# Supplementary material for: The Impact of Management on Hospital Performance
Source: bioRxiv or medRxiv preprint supplement (doi:10.1101/2020.06.02.20119545), 2021-05-25
Supplement: Supplementary file [file 2020.06.02.20119545-1.pdf]

# The Impact of Management on Hospital Performance - supplementary appendix

Asaria, Miqdad <sup>\*1,2</sup>, Gershlick, Benjamin<sup>2</sup>, McGuire, Alistair<sup>1</sup> and Street, Andrew<sup>1</sup>

<sup>1</sup>Department of Health Policy, London School of Economics and Political Science

<sup>2</sup>Health Foundation, London

June 1, 2020

## 1 Data

Table 1: Data Sources

| Data                                              | Source                         | URL                                                                                                                                                                                                                                                     |
|---------------------------------------------------|--------------------------------|---------------------------------------------------------------------------------------------------------------------------------------------------------------------------------------------------------------------------------------------------------|
| Inpatient admissions                              | NHS Digital                    | <a href="https://digital.nhs.uk/data-and-information/publications/statistical/hospital-admitted-patient-care-activity/2018-19">https://digital.nhs.uk/data-and-information/publications/statistical/hospital-admitted-patient-care-activity/2018-19</a> |
| Accident and emergency target                     | NHS Digital                    | <a href="https://digital.nhs.uk/data-and-information/publications/statistical/hospital-accident-emergency-activity/2018-19">https://digital.nhs.uk/data-and-information/publications/statistical/hospital-accident-emergency-activity/2018-19</a>       |
| Inpatient admissions referral to treatment target | NHS England                    | <a href="https://www.england.nhs.uk/statistics/statistical-work-areas/rtt-waiting-times/rtt-data-2018-19/">https://www.england.nhs.uk/statistics/statistical-work-areas/rtt-waiting-times/rtt-data-2018-19/</a>                                         |
| NHS staff survey management scores                | NHS survey coordination centre | <a href="https://www.nhsstaffsurveys.com/Page/1064/Latest-Results/2018-Results/">https://www.nhsstaffsurveys.com/Page/1064/Latest-Results/2018-Results/</a>                                                                                             |
| NHS workforce statistics (ESR)                    | NHS Digital                    | <a href="https://digital.nhs.uk/data-and-information/publications/statistical/nhs-workforce-statistics/september-2018">https://digital.nhs.uk/data-and-information/publications/statistical/nhs-workforce-statistics/september-2018</a>                 |
| Summary Hospital-level Mortality Indicator (SHMI) | NHS Digital                    | <a href="https://digital.nhs.uk/data-and-information/publications/clinical-indicators/shmi/">https://digital.nhs.uk/data-and-information/publications/clinical-indicators/shmi/</a>                                                                     |
| Care quality commission rating                    | Care quality commission        | <a href="https://www.cqc.org.uk/about-us/transparency/using-cqc-data">https://www.cqc.org.uk/about-us/transparency/using-cqc-data</a>                                                                                                                   |
| Financial performance of NHS trusts               | NHS Improvement                | <a href="https://improvement.nhs.uk/resources/nhs-providers-trust-accounts-consolidation-tac-data-201718/">https://improvement.nhs.uk/resources/nhs-providers-trust-accounts-consolidation-tac-data-201718/</a>                                         |
| Bed Availability and Occupancy Data ð Overnight   | NHS England                    | <a href="https://www.england.nhs.uk/statistics/statistical-work-areas/bed-availability-and-occupancy/bed-data-overnight/">https://www.england.nhs.uk/statistics/statistical-work-areas/bed-availability-and-occupancy/bed-data-overnight/</a>           |

Table 2: Staff Survey Management Questions

| 7) My immediate manager:                                           | 8) Senior managers:                                                 |
|--------------------------------------------------------------------|---------------------------------------------------------------------|
| a. encourages those who work for her/him to work as a team         | a. I know who the senior managers are here                          |
| b. can be counted on to help me with a difficult task at work      | b. Communication between senior management and staff is effective   |
| c. gives me clear feedback on my work                              | c. Senior managers here try to involve staff in important decisions |
| d. asks for my opinion before making decisions that affect my work | d. Senior managers act on staff feedback                            |
| e. is supportive in a personal crisis                              |                                                                     |
| f. takes a positive interest in my health and well-being           |                                                                     |
| g. values my work                                                  |                                                                     |

\* Contact Author. Email: m.asaria@lse.ac.uk

Figure 1: How we narrowed down to 97 acute NHS hospital trusts

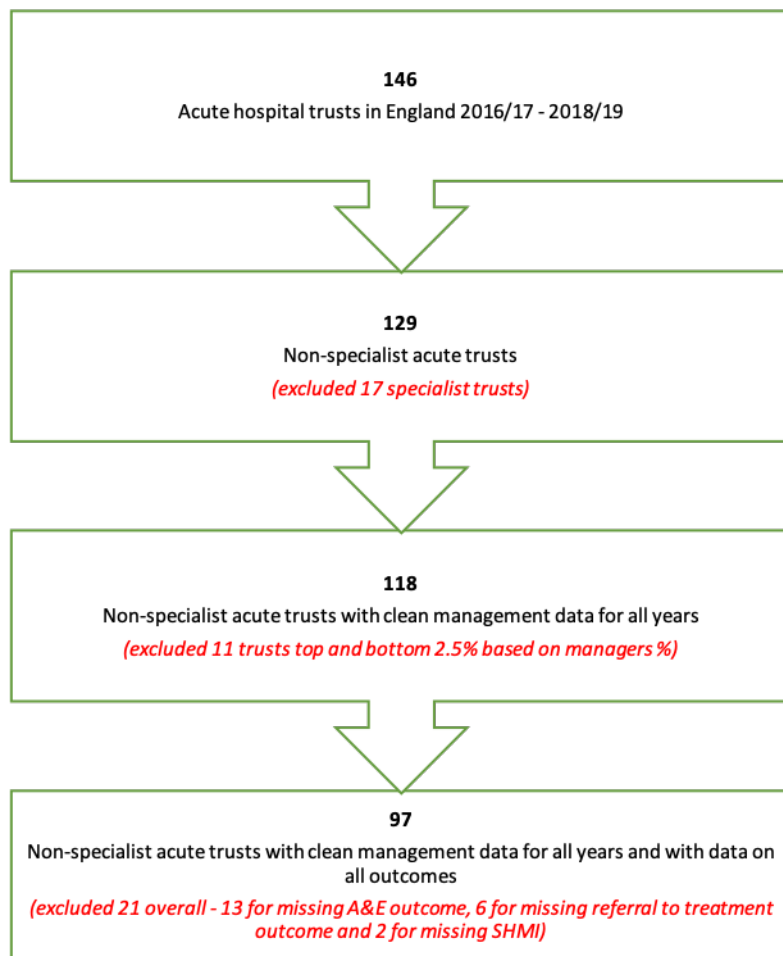

Table 3: List of 97 Acute NHS Trusts included in analysis presented in paper with data for 2018/19

| <b>Trust Name</b>                                    | <b>Organisation Code</b> | <b>Managers (% of all staff)</b> | <b>Managers (FTE)</b> | <b>Spend on Management (£ millions)</b> | <b>Staff Survey Management Score</b> |
|------------------------------------------------------|--------------------------|----------------------------------|-----------------------|-----------------------------------------|--------------------------------------|
| Aintree University Hospital                          | REM                      | 3.27                             | 148.3                 | 8.89                                    | 63.7                                 |
| Airedale                                             | RCF                      | 3.39                             | 85.0                  | 5.06                                    | 67.1                                 |
| Ashford and St. Peter's Hospitals                    | RTK                      | 2.44                             | 79.5                  | 5.39                                    | 64.2                                 |
| Barking, Havering and Redbridge University Hospitals | RF4                      | 2.57                             | 149.2                 | 11.51                                   | 63.3                                 |
| Barnsley Hospital                                    | RFF                      | 2.52                             | 74.4                  | 4.09                                    | 65.6                                 |
| Basildon and Thurrock University Hospitals           | RDD                      | 3.16                             | 133.3                 | 8.68                                    | 64.0                                 |
| Bedford Hospital                                     | RC1                      | 2.34                             | 58.5                  | 3.75                                    | 64.0                                 |
| Blackpool Teaching Hospitals                         | RXL                      | 4.64                             | 288.4                 | 15.05                                   | 64.5                                 |
| Bolton                                               | RMC                      | 1.73                             | 88.5                  | 5.74                                    | 68.4                                 |
| Bradford Teaching Hospitals                          | RAE                      | 2.19                             | 112.8                 | 7.39                                    | 65.3                                 |
| Brighton and Sussex University Hospitals             | RXH                      | 2.63                             | 192.7                 | 11.47                                   | 64.4                                 |
| Buckinghamshire Healthcare                           | RXQ                      | 3.88                             | 197.7                 | 11.39                                   | 66.2                                 |
| Calderdale and Huddersfield                          | RWY                      | 2.42                             | 125.1                 | 6.69                                    | 63.0                                 |
| Cambridge University Hospitals                       | RGT                      | 2.84                             | 262.8                 | 16.36                                   | 66.6                                 |
| Chelsea and Westminster Hospital                     | RQM                      | 4.83                             | 261.7                 | 16.06                                   | 65.7                                 |
| Chesterfield Royal Hospital                          | RFS                      | 1.91                             | 67.1                  | 3.81                                    | 65.7                                 |
| Colchester Hospital University                       | RDE                      | 2.84                             | 230.8                 | 14.27                                   | 60.5                                 |
| Countess of Chester Hospital                         | RJR                      | 3.11                             | 107.1                 | 5.89                                    | 63.9                                 |
| County Durham and Darlington                         | RXP                      | 3.03                             | 186.6                 | 10.52                                   | 62.8                                 |
| Croydon Health Services                              | RJ6                      | 4.31                             | 139.1                 | 8.15                                    | 62.2                                 |
| Derby Teaching Hospitals                             | RTG                      | 2.81                             | 289.3                 | 16.63                                   | 64.2                                 |
| Doncaster and Bassetlaw Teaching Hospitals           | RP5                      | 3.26                             | 173.7                 | 9.42                                    | 61.7                                 |
| Dorset County Hospital                               | RBD                      | 3.99                             | 90.1                  | 5.28                                    | 66.1                                 |
| East Cheshire                                        | RJN                      | 3.64                             | 80.9                  | 4.67                                    | 67.5                                 |
| East Kent Hospitals University                       | RVV                      | 1.73                             | 132.8                 | 8.44                                    | 60.5                                 |
| East Lancashire Hospitals                            | RXR                      | 3.24                             | 238.6                 | 13.36                                   | 67.7                                 |
| East Sussex Healthcare                               | RXC                      | 2.64                             | 159.3                 | 9.62                                    | 64.8                                 |
| Frimley Health                                       | RDU                      | 2.21                             | 177.0                 | 11.30                                   | 68.3                                 |
| George Eliot Hospital                                | RLT                      | 2.67                             | 53.4                  | 3.45                                    | 62.1                                 |
| Great Western Hospitals                              | RN3                      | 2.32                             | 90.7                  | 5.82                                    | 63.9                                 |

Table 3 continued from previous page

| Trust Name                               | Organisation Code | Managers (% of all staff) | Managers (FTE) | Spend on Management (£ millions) | Staff Survey Management Score |
|------------------------------------------|-------------------|---------------------------|----------------|----------------------------------|-------------------------------|
| Harrogate and District                   | RCD               | 2.58                      | 94.5           | 5.48                             | 67.0                          |
| Hillingdon Hospitals                     | RAS               | 4.33                      | 126.2          | 7.83                             | 62.9                          |
| Homerton University Hospital             | RQX               | 3.12                      | 105.3          | 6.64                             | 67.9                          |
| Hull and East Yorkshire Hospitals        | RWA               | 3.60                      | 259.4          | 14.42                            | 65.4                          |
| Imperial College Healthcare              | RYJ               | 4.56                      | 465.5          | 27.69                            | 62.6                          |
| James Paget University Hospitals         | RGP               | 3.45                      | 91.6           | 5.46                             | 63.4                          |
| Kettering General Hospital               | RNQ               | 3.64                      | 125.6          | 7.10                             | 65.0                          |
| King's College Hospital                  | RJZ               | 2.63                      | 298.3          | 19.70                            | 61.7                          |
| Kingston Hospital                        | RAX               | 3.37                      | 96.8           | 6.77                             | 66.9                          |
| Lancashire Teaching Hospitals            | RXN               | 2.19                      | 151.8          | 9.36                             | 63.2                          |
| Leeds Teaching Hospitals                 | RR8               | 1.57                      | 237.3          | 15.77                            | 68.2                          |
| Lewisham and Greenwich                   | RJ2               | 3.56                      | 197.8          | 12.36                            | 65.7                          |
| London North West Healthcare             | R1K               | 4.44                      | 337.2          | 20.51                            | 62.5                          |
| Luton and Dunstable University Hospital  | RC9               | 4.25                      | 158.1          | 9.33                             | 67.3                          |
| Maidstone and Tunbridge Wells            | RWF               | 3.40                      | 167.2          | 9.78                             | 62.8                          |
| Medway                                   | RPA               | 2.43                      | 89.0           | 5.80                             | 56.5                          |
| Mid Cheshire Hospitals                   | RBT               | 2.77                      | 102.8          | 5.98                             | 65.4                          |
| Milton Keynes University Hospital        | RD8               | 4.51                      | 133.5          | 7.99                             | 64.2                          |
| Norfolk and Norwich University Hospitals | RM1               | 1.97                      | 133.7          | 8.46                             | 61.6                          |
| North Cumbria University Hospitals       | RNL               | 3.04                      | 106.9          | 6.24                             | 56.8                          |
| North Tees and Hartlepool                | RVW               | 3.10                      | 140.2          | 8.11                             | 66.4                          |
| North West Anglia                        | RGN               | 4.01                      | 214.1          | 11.69                            | 63.3                          |
| Northampton General Hospital             | RNS               | 3.83                      | 164.0          | 8.67                             | 63.5                          |
| Northumbria Healthcare                   | RTF               | 4.54                      | 310.1          | 17.66                            | 68.0                          |
| Nottingham University Hospitals          | RX1               | 3.63                      | 472.8          | 26.36                            | 65.2                          |
| Oxford University Hospitals              | RTH               | 2.97                      | 314.0          | 18.56                            | 63.8                          |
| Pennine Acute Hospitals                  | RW6               | 3.37                      | 295.7          | 17.12                            | 62.3                          |
| Plymouth Hospitals                       | RK9               | 2.28                      | 141.8          | 8.99                             | 66.4                          |
| Poole Hospital                           | RD3               | 2.92                      | 98.2           | 5.66                             | 65.4                          |
| Queen Elizabeth Hospital King's Lynn     | RCX               | 3.96                      | 110.0          | 6.29                             | 58.7                          |
| Rotherham                                | RFR               | 3.13                      | 115.1          | 6.88                             | 62.2                          |

Table 3 continued from previous page

| Trust Name                                          | Organisation<br>Code | Managers<br>(% of all staff) | Managers<br>(FTE) | Spend on Management<br>(£ millions) | Staff Survey<br>Management Score |
|-----------------------------------------------------|----------------------|------------------------------|-------------------|-------------------------------------|----------------------------------|
| Royal Berkshire                                     | RHW                  | 2.94                         | 136.9             | 7.93                                | 66.5                             |
| Royal Bournemouth and Christchurch Hospitals        | RDZ                  | 2.98                         | 118.4             | 7.23                                | 69.7                             |
| Royal Devon and Exeter                              | RH8                  | 2.42                         | 167.1             | 9.61                                | 66.4                             |
| Royal Liverpool and Broadgreen University Hospitals | RQ6                  | 5.00                         | 314.7             | 17.30                               | 65.4                             |
| Royal Surrey County Hospital                        | RA2                  | 4.15                         | 149.2             | 9.20                                | 66.5                             |
| Royal United Hospitals Bath                         | RD1                  | 4.00                         | 177.1             | 10.00                               | 64.0                             |
| Royal Wolverhampton                                 | RL4                  | 1.83                         | 133.0             | 8.50                                | 66.4                             |
| Salford Royal                                       | RM3                  | 3.94                         | 285.0             | 17.40                               | 64.8                             |
| Salisbury                                           | RNZ                  | 2.82                         | 81.2              | 4.67                                | 65.1                             |
| Sheffield Teaching Hospitals                        | RHQ                  | 2.26                         | 315.1             | 19.57                               | 65.9                             |
| Sherwood Forest Hospitals                           | RK5                  | 4.54                         | 186.0             | 10.55                               | 67.0                             |
| Shrewsbury and Telford Hospital                     | RXW                  | 4.84                         | 241.0             | 12.75                               | 61.6                             |
| South Tees Hospitals                                | RTR                  | 2.11                         | 156.6             | 9.20                                | 59.4                             |
| South Warwickshire                                  | RJC                  | 3.40                         | 133.4             | 7.55                                | 66.1                             |
| St Helens and Knowsley Hospitals                    | RBN                  | 3.23                         | 168.2             | 12.78                               | 69.7                             |
| Stockport                                           | RWJ                  | 3.61                         | 162.9             | 9.59                                | 63.1                             |
| Surrey and Sussex Healthcare                        | RTP                  | 2.81                         | 102.7             | 6.85                                | 70.8                             |
| Tameside and Glossop Integrated Care                | RMP                  | 2.82                         | 95.2              | 6.02                                | 64.6                             |
| Taunton and Somerset                                | RBA                  | 2.57                         | 102.7             | 6.11                                | 66.0                             |
| Torbay and South Devon                              | RA9                  | 3.21                         | 163.4             | 9.63                                | 64.8                             |
| United Lincolnshire Hospitals                       | RWD                  | 2.26                         | 144.8             | 8.84                                | 58.5                             |
| University Hospitals Bristol                        | RA7                  | 2.35                         | 187.7             | 11.98                               | 65.4                             |
| University Hospitals Coventry and Warwickshire      | RKB                  | 4.54                         | 322.7             | 17.82                               | 65.9                             |
| University Hospitals of Leicester                   | RWE                  | 1.50                         | 193.3             | 12.79                               | 63.0                             |
| University Hospitals of Morecambe Bay               | RTX                  | 3.39                         | 178.6             | 10.23                               | 65.4                             |
| University Hospitals of North Midlands              | RJE                  | 2.36                         | 220.5             | 12.97                               | 61.7                             |
| Walsall Healthcare                                  | RBK                  | 2.78                         | 101.2             | 5.67                                | 63.5                             |
| Warrington and Halton Hospitals                     | RWW                  | 5.16                         | 180.3             | 9.96                                | 66.2                             |
| West Hertfordshire Hospitals                        | RWG                  | 4.02                         | 170.6             | 10.08                               | 67.4                             |
| West Suffolk                                        | RGR                  | 4.75                         | 156.0             | 8.55                                | 67.5                             |
| Whittington Hospital                                | RKE                  | 4.43                         | 162.8             | 9.68                                | 64.5                             |

Table 3 continued from previous page

| Trust Name                          | Organisation<br>Code | Managers<br>(% of all staff) | Managers<br>(FTE) | Spend on Management<br>(£ millions) | Staff Survey<br>Management Score |
|-------------------------------------|----------------------|------------------------------|-------------------|-------------------------------------|----------------------------------|
| Wirral University Teaching Hospital | RBL                  | 3.39                         | 176.3             | 9.63                                | 60.8                             |
| Wrightington, Wigan and Leigh       | RRF                  | 3.68                         | 159.7             | 9.35                                | 64.0                             |
| Wye Valley                          | RLQ                  | 4.20                         | 110.7             | 6.07                                | 62.2                             |
| Yeovil District Hospital            | RA4                  | 4.04                         | 79.1              | 4.69                                | 68.3                             |
| York Teaching Hospital              | RCB                  | 3.14                         | 220.1             | 12.40                               | 64.4                             |

Figure 2: Managers by staff type in 97 acute NHS hospital trusts in 2016/17

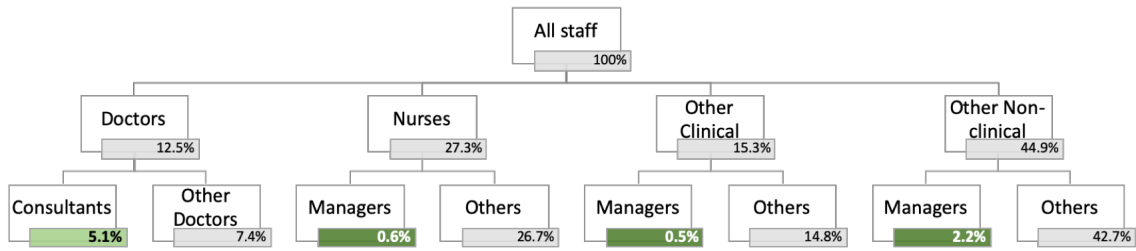

Figure 3: Managers by staff type in 97 acute NHS hospital trusts in 2017/18

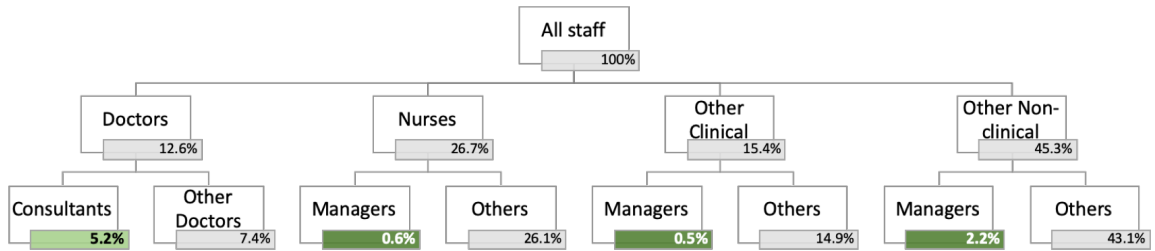

Figure 4: Managers by staff type in 97 acute NHS hospital trusts in 2018/19

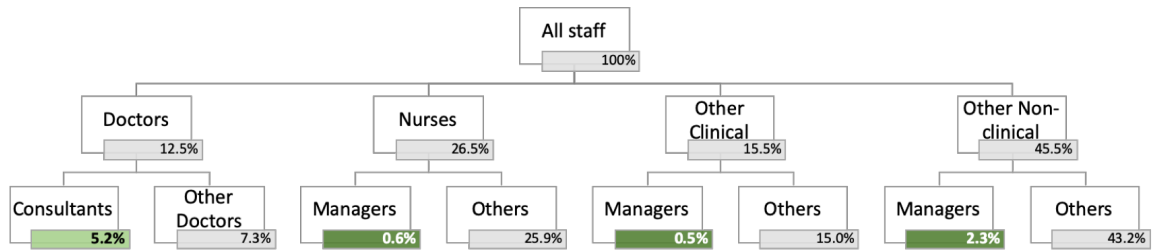

Figure 5: Managers by agenda for change pay grade in in 97 acute NHS hospital trusts in 2016/17

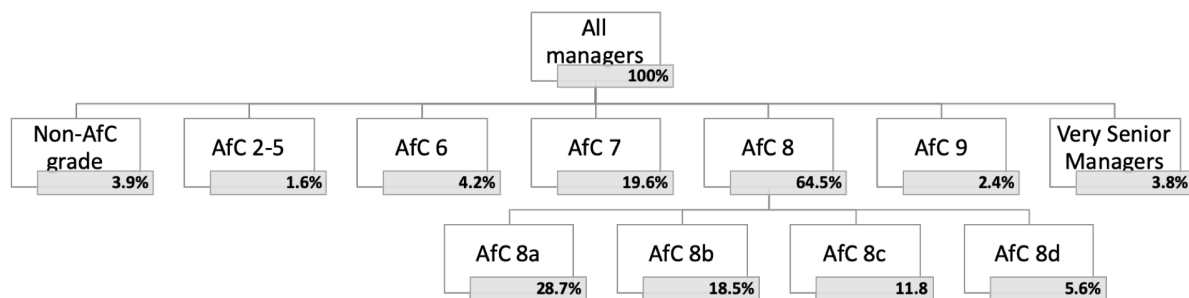

Figure 6: Managers by agenda for change pay grade in in 97 acute NHS hospital trusts in 2017/18

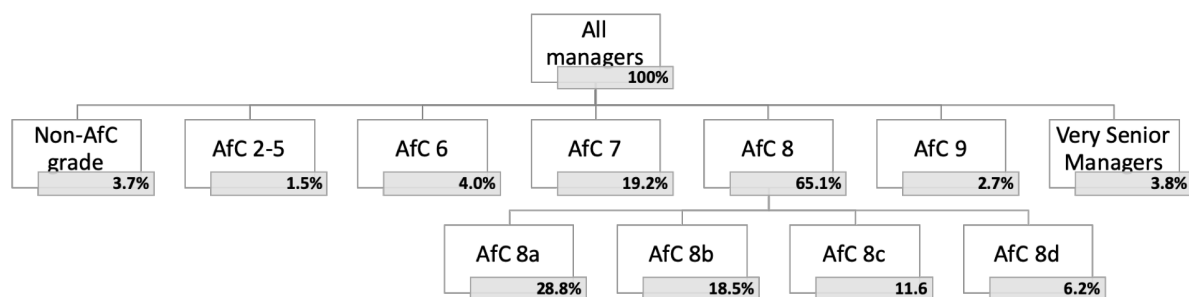

Figure 7: Managers by agenda for change pay grade in in 97 acute NHS hospital trusts in 2018/19

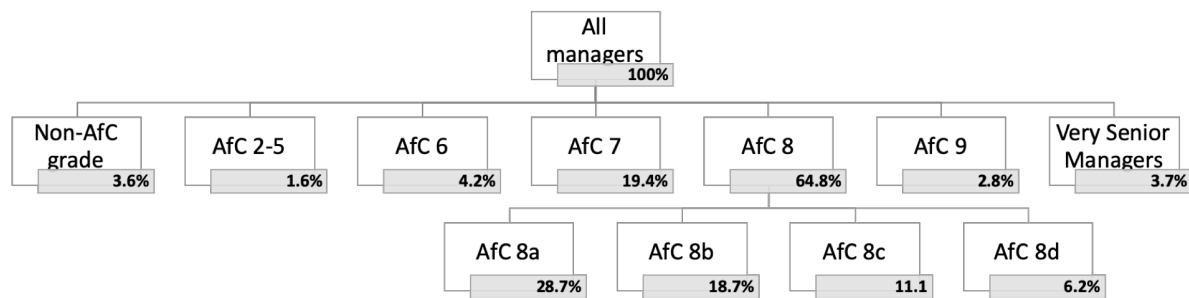

Figure 8: Cross tabulation of agenda for change pay grade and staff type in 97 acute NHS hospital trusts in 2016/17

|                                             | Non AfC Grade | Band 2       | Band 3       | Band 4       | Band 5       | Band 6       | Band 7        | Band 8a       | Band 8b       | Band 8c       | Band 8d      | Band 9       | Very Senior Manager | Total          |
|---------------------------------------------|---------------|--------------|--------------|--------------|--------------|--------------|---------------|---------------|---------------|---------------|--------------|--------------|---------------------|----------------|
| Manager Central functions                   | 2.29%         | 0.01%        | 0.06%        | 0.11%        | 0.53%        | 2.13%        | 7.84%         | 11.89%        | 8.97%         | 5.80%         | 3.28%        | 1.40%        | 3.49%               | 47.79%         |
| Manager Clinical support                    | 0.51%         | 0.00%        | 0.04%        | 0.10%        | 0.40%        | 0.73%        | 1.88%         | 3.49%         | 2.50%         | 1.84%         | 0.72%        | 0.39%        | 0.19%               | 12.79%         |
| Manager Hotel, property & estates           | 0.12%         | 0.04%        | 0.05%        | 0.02%        | 0.07%        | 0.43%        | 1.01%         | 1.26%         | 0.79%         | 0.44%         | 0.24%        | 0.11%        | 0.09%               | 4.69%          |
| Manager Scientific, therapeutic & technical | 0.07%         | 0.00%        | 0.00%        | 0.02%        | 0.02%        | 0.07%        | 0.27%         | 0.36%         | 0.24%         | 0.16%         | 0.05%        | 0.02%        | 0.01%               | 1.30%          |
| Nurses & health visitors                    | 0.76%         | 0.00%        | 0.00%        | 0.00%        | 0.02%        | 0.57%        | 6.53%         | 5.42%         | 2.62%         | 1.95%         | 0.57%        | 0.16%        | 0.00%               | 18.60%         |
| Scientific, therapeutic & technical staff   | 0.14%         | 0.00%        | 0.00%        | 0.03%        | 0.09%        | 0.25%        | 2.07%         | 6.27%         | 3.33%         | 1.62%         | 0.70%        | 0.33%        | 0.00%               | 14.83%         |
| <b>Total</b>                                | <b>3.89%</b>  | <b>0.05%</b> | <b>0.15%</b> | <b>0.29%</b> | <b>1.14%</b> | <b>4.17%</b> | <b>19.61%</b> | <b>28.69%</b> | <b>18.45%</b> | <b>11.82%</b> | <b>5.56%</b> | <b>2.42%</b> | <b>3.78%</b>        | <b>100.00%</b> |



Figure 9: Cross tabulation of agenda for change pay grade and staff type in 97 acute NHS hospital trusts in 2017/18

|                                             | Non AFC      |              |              |              |              |              |               |               |               |               |              |              | Very Senior  | Total          |
|---------------------------------------------|--------------|--------------|--------------|--------------|--------------|--------------|---------------|---------------|---------------|---------------|--------------|--------------|--------------|----------------|
|                                             | Grade        | Band 2       | Band 3       | Band 4       | Band 5       | Band 6       | Band 7        | Band 8a       | Band 8b       | Band 8c       | Band 8d      | Band 9       | Manager      |                |
| Manager Central functions                   | 2.05%        | 0.01%        | 0.04%        | 0.11%        | 0.53%        | 1.97%        | 7.46%         | 12.05%        | 9.24%         | 5.75%         | 3.82%        | 1.57%        | 3.44%        | 48.04%         |
| Manager Clinical support                    | 0.52%        | 0.00%        | 0.03%        | 0.08%        | 0.39%        | 0.81%        | 2.01%         | 3.76%         | 2.51%         | 1.66%         | 0.76%        | 0.39%        | 0.21%        | 13.14%         |
| Manager Hotel, property & estates           | 0.19%        | 0.01%        | 0.02%        | 0.01%        | 0.12%        | 0.42%        | 0.93%         | 1.22%         | 0.69%         | 0.47%         | 0.20%        | 0.12%        | 0.10%        | 4.50%          |
| Manager Scientific, therapeutic & technical | 0.05%        | 0.00%        | 0.00%        | 0.01%        | 0.02%        | 0.08%        | 0.26%         | 0.31%         | 0.18%         | 0.18%         | 0.05%        | 0.02%        | 0.03%        | 1.19%          |
| Nurses & health visitors                    | 0.79%        | 0.00%        | 0.00%        | 0.00%        | 0.02%        | 0.47%        | 6.35%         | 5.19%         | 2.69%         | 1.95%         | 0.64%        | 0.26%        | 0.00%        | 18.36%         |
| Scientific, therapeutic & technical staff   | 0.14%        | 0.00%        | 0.00%        | 0.02%        | 0.06%        | 0.28%        | 2.16%         | 6.23%         | 3.22%         | 1.61%         | 0.70%        | 0.32%        | 0.00%        | 14.76%         |
| <b>Total</b>                                | <b>3.73%</b> | <b>0.02%</b> | <b>0.09%</b> | <b>0.23%</b> | <b>1.15%</b> | <b>4.04%</b> | <b>19.18%</b> | <b>28.76%</b> | <b>18.53%</b> | <b>11.63%</b> | <b>6.17%</b> | <b>2.67%</b> | <b>3.78%</b> | <b>100.00%</b> |

Figure 10: Cross tabulation of agenda for change pay grade and staff type in 97 acute NHS hospital trusts in 2018/19

|                                             | Non AFC      |              |              |              |              |              |               |               |               |               |              |              | Very Senior  | Total          |
|---------------------------------------------|--------------|--------------|--------------|--------------|--------------|--------------|---------------|---------------|---------------|---------------|--------------|--------------|--------------|----------------|
|                                             | Grade        | Band 2       | Band 3       | Band 4       | Band 5       | Band 6       | Band 7        | Band 8a       | Band 8b       | Band 8c       | Band 8d      | Band 9       | Manager      |                |
| Manager Central functions                   | 1.89%        | 0.01%        | 0.06%        | 0.14%        | 0.58%        | 2.19%        | 7.57%         | 12.16%        | 9.47%         | 5.48%         | 3.76%        | 1.68%        | 3.42%        | 48.42%         |
| Manager Clinical support                    | 0.53%        | 0.00%        | 0.02%        | 0.05%        | 0.48%        | 0.80%        | 2.03%         | 3.68%         | 2.55%         | 1.56%         | 0.89%        | 0.37%        | 0.18%        | 13.15%         |
| Manager Hotel, property & estates           | 0.23%        | 0.01%        | 0.00%        | 0.01%        | 0.12%        | 0.34%        | 0.90%         | 1.25%         | 0.76%         | 0.53%         | 0.19%        | 0.11%        | 0.11%        | 4.55%          |
| Manager Scientific, therapeutic & technical | 0.04%        | 0.00%        | 0.00%        | 0.02%        | 0.02%        | 0.08%        | 0.25%         | 0.30%         | 0.19%         | 0.17%         | 0.05%        | 0.02%        | 0.02%        | 1.16%          |
| Nurses & health visitors                    | 0.76%        | 0.00%        | 0.00%        | 0.00%        | 0.00%        | 0.57%        | 6.63%         | 5.21%         | 2.70%         | 1.88%         | 0.70%        | 0.28%        | 0.00%        | 18.73%         |
| Scientific, therapeutic & technical staff   | 0.11%        | 0.00%        | 0.00%        | 0.02%        | 0.06%        | 0.20%        | 1.99%         | 6.14%         | 3.02%         | 1.51%         | 0.63%        | 0.31%        | 0.00%        | 13.98%         |
| <b>Total</b>                                | <b>3.57%</b> | <b>0.01%</b> | <b>0.08%</b> | <b>0.23%</b> | <b>1.26%</b> | <b>4.19%</b> | <b>19.37%</b> | <b>28.74%</b> | <b>18.68%</b> | <b>11.13%</b> | <b>6.23%</b> | <b>2.77%</b> | <b>3.73%</b> | <b>100.00%</b> |

Figure 11: Distribution of key variables across 97 acute NHS hospital trusts in 2016/17

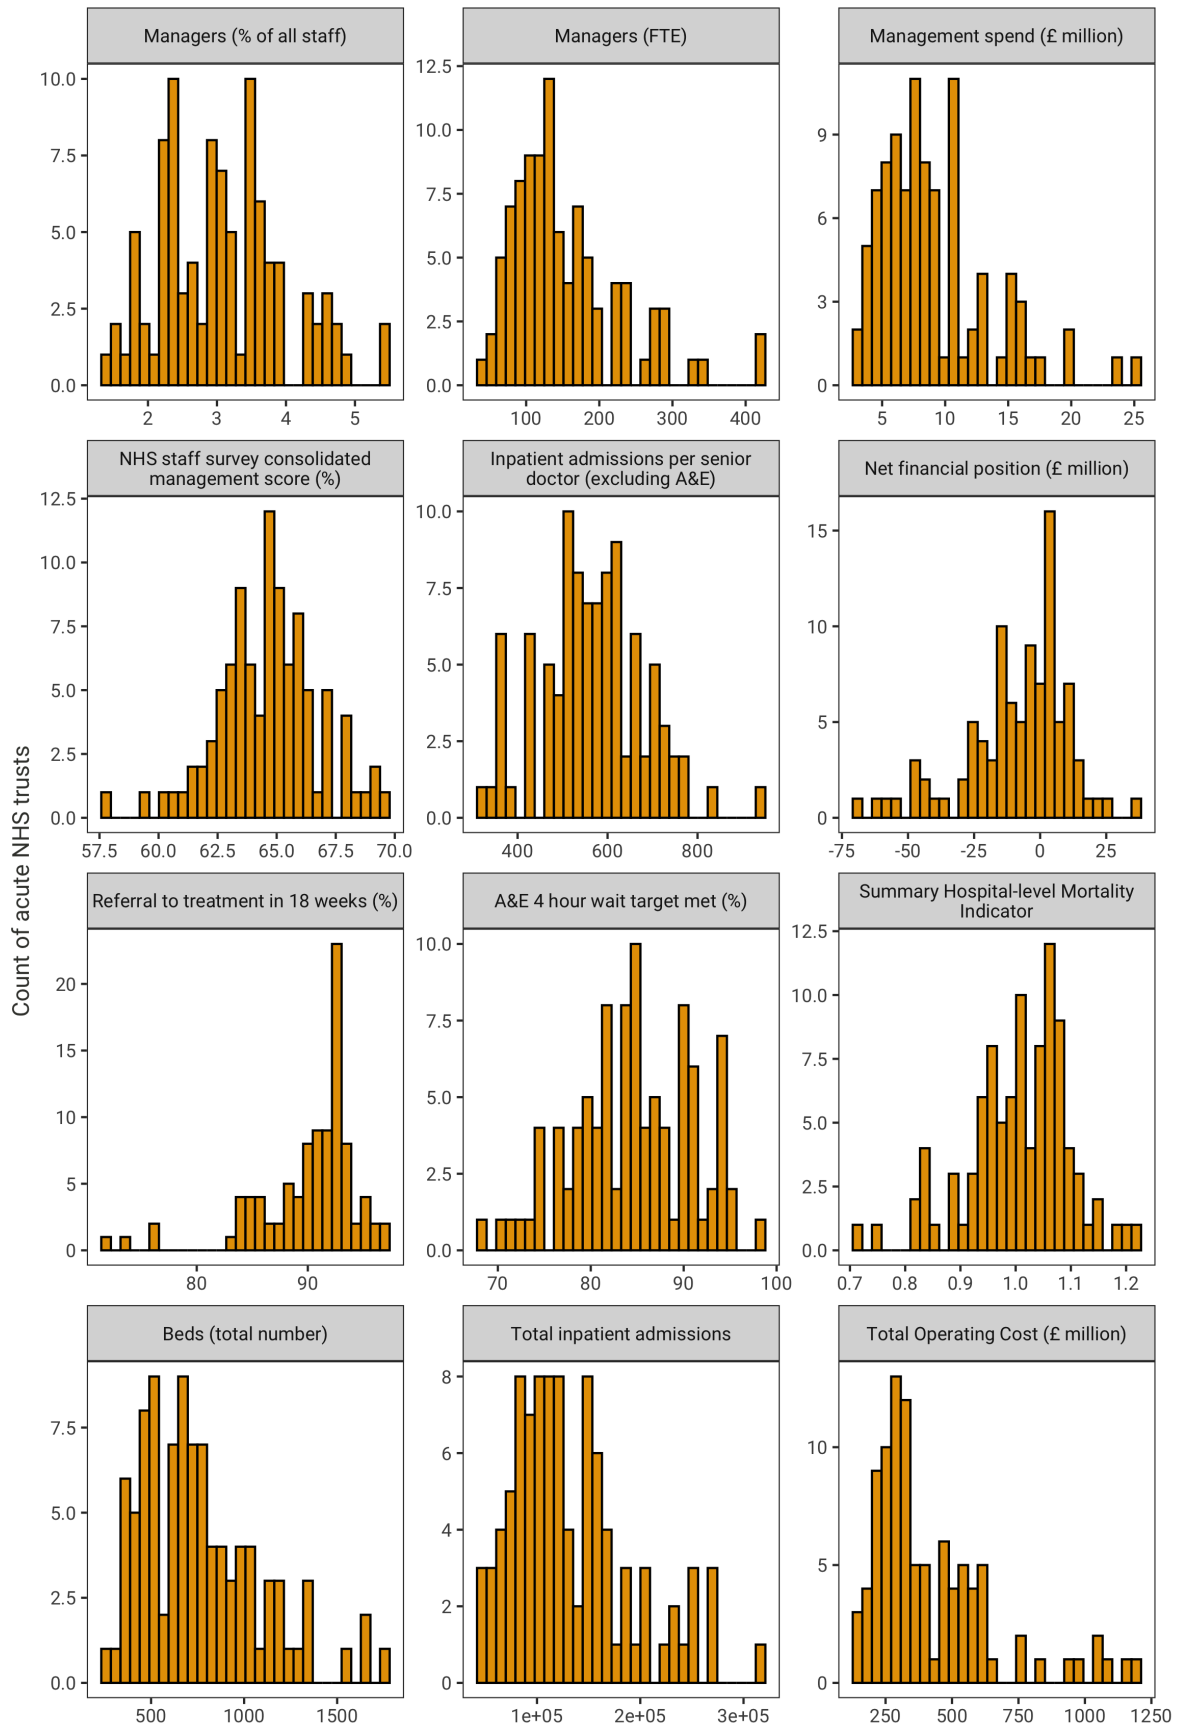

Figure 12: Distribution of key variables across 97 acute NHS hospital trusts in 2017/18

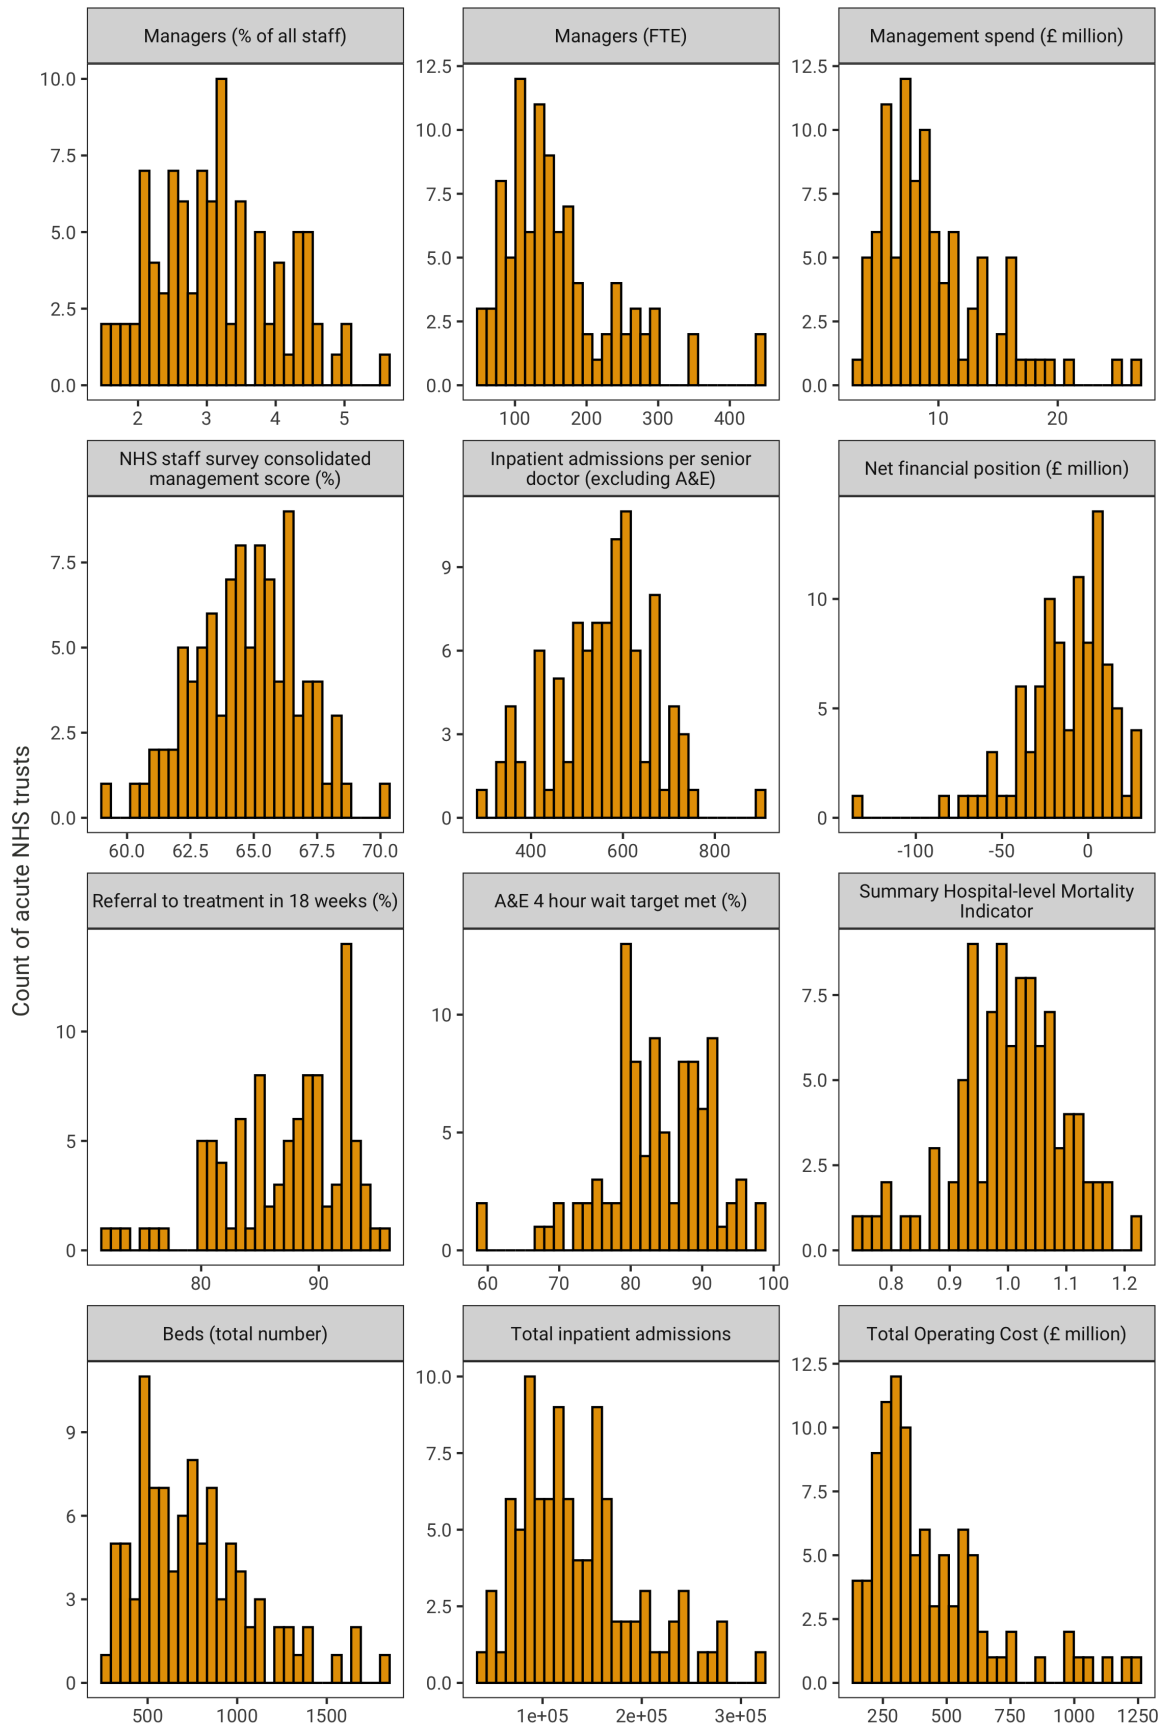

Figure 13: Distribution of key variables across 97 acute NHS hospital trusts in 2018/19

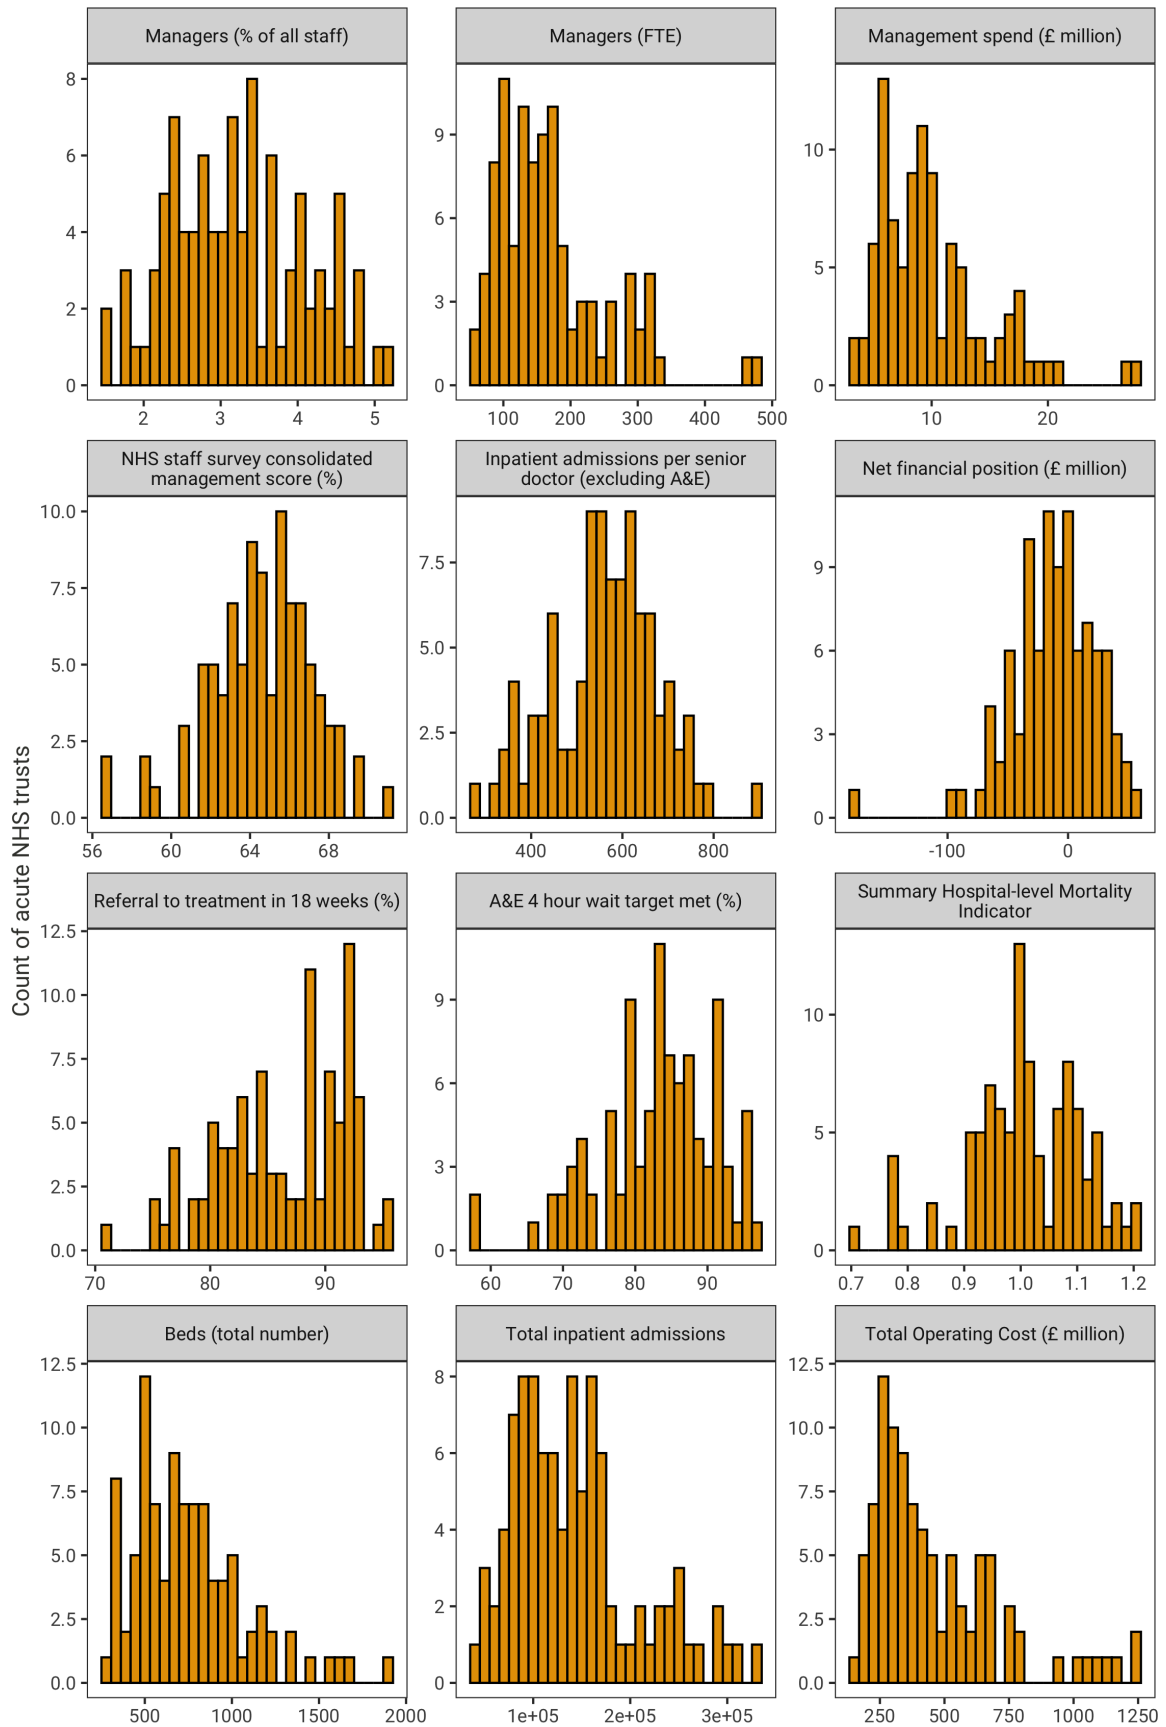

Figure 14: Relationship between management input (%) and resources to be managed across 97 acute NHS hospital trusts in 2016/17

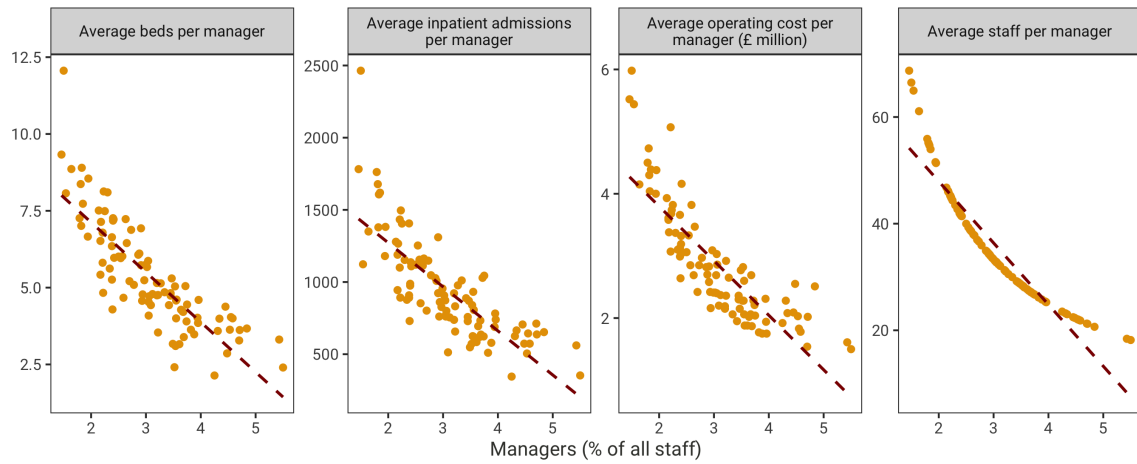

Figure 15: Relationship between management input (%) and resources to be managed across 97 acute NHS hospital trusts in 2017/18

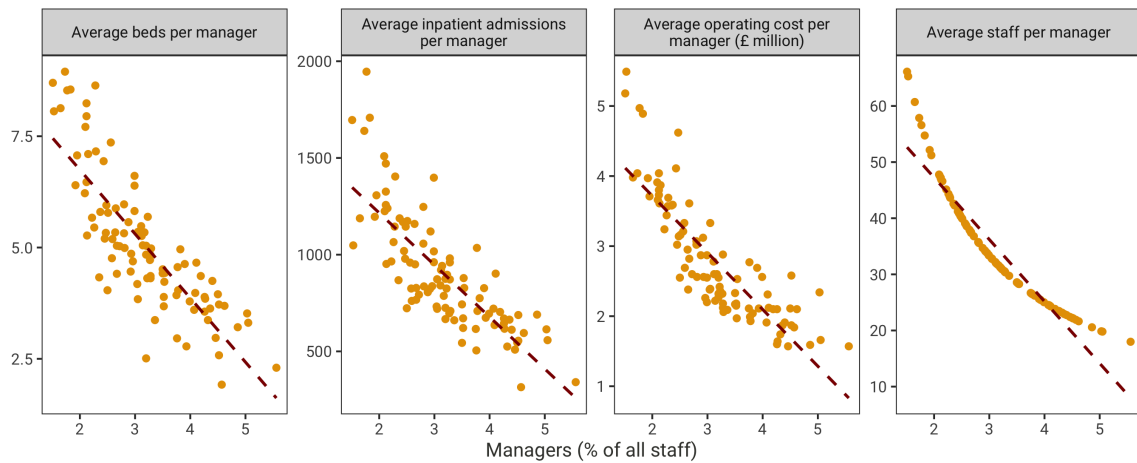

Figure 16: Relationship between management input (%) and resources to be managed across 97 acute NHS hospital trusts in 2018/19

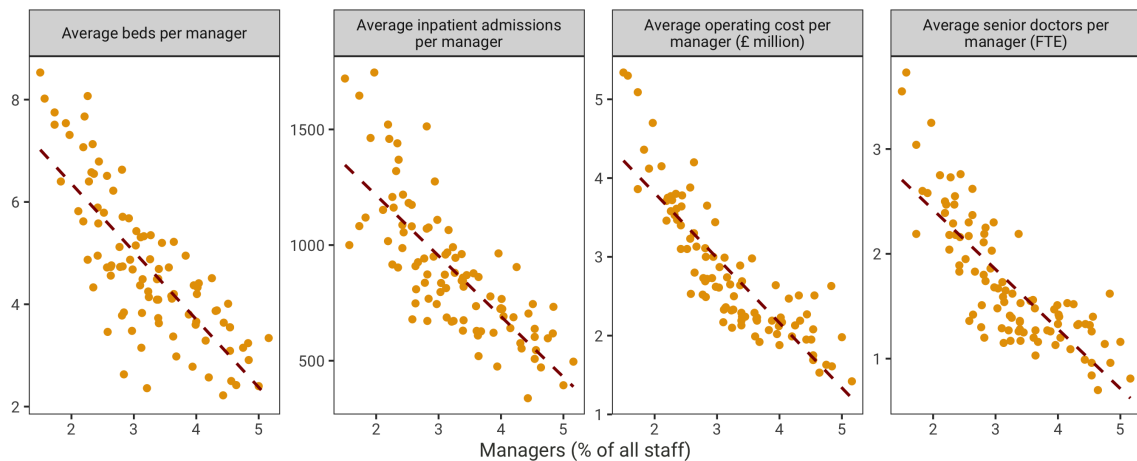

Figure 17: Relationship between management input (FTE) and resources to be managed across 97 acute NHS hospital trusts in 2016/17

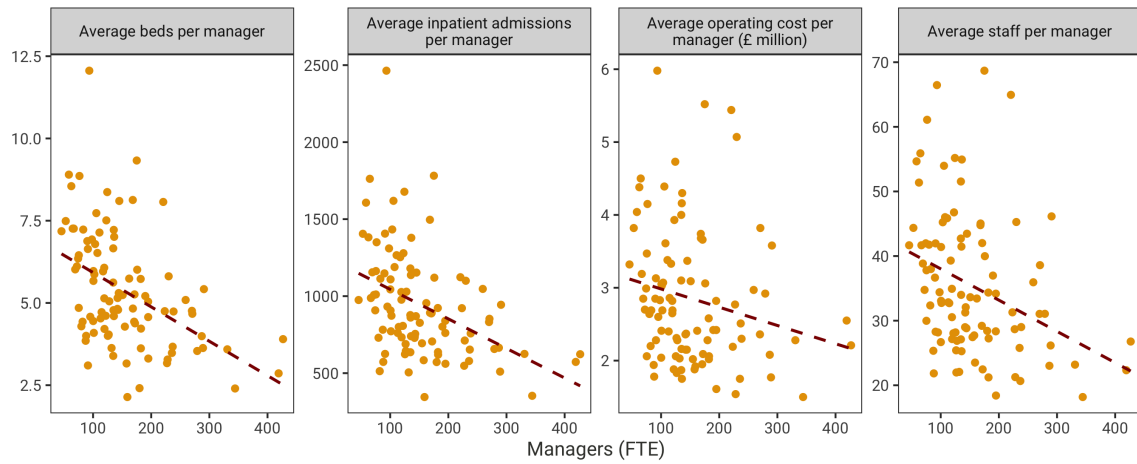

Figure 18: Relationship between management input (FTE) and resources to be managed across 97 acute NHS hospital trusts in 2017/18

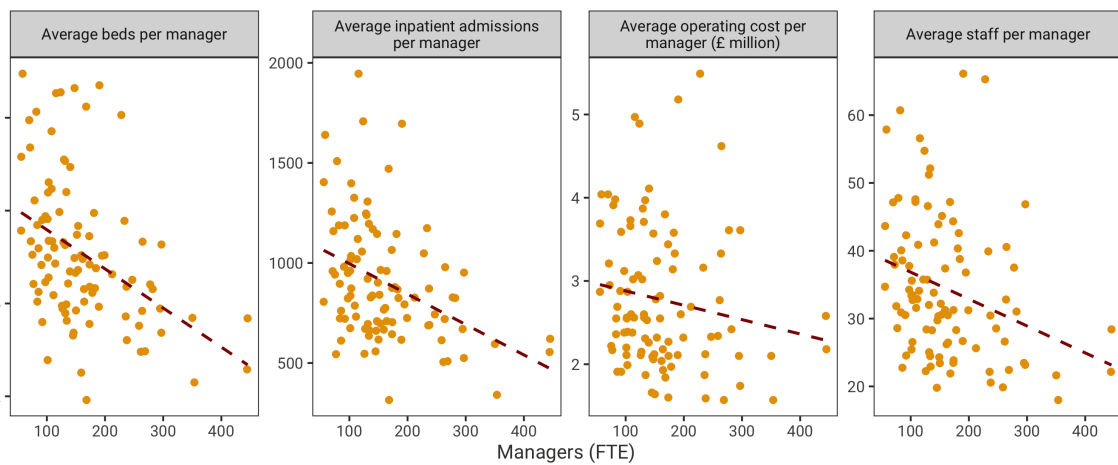

Figure 19: Relationship between management input (FTE) and resources to be managed across 97 acute NHS hospital trusts in 2018/19

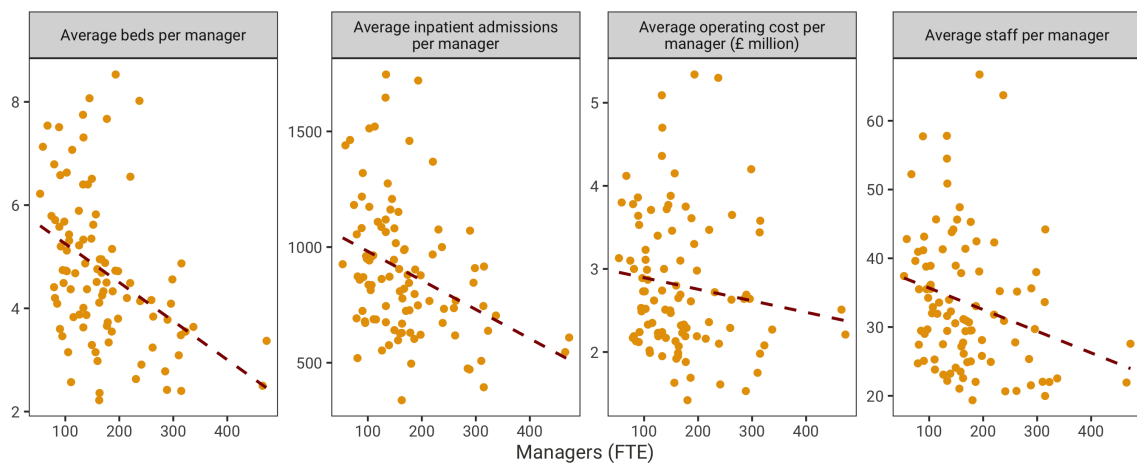

## 2 Supplementary results

Figure 20: Managers time series in acute NHS hospital trusts using basic management definition\*

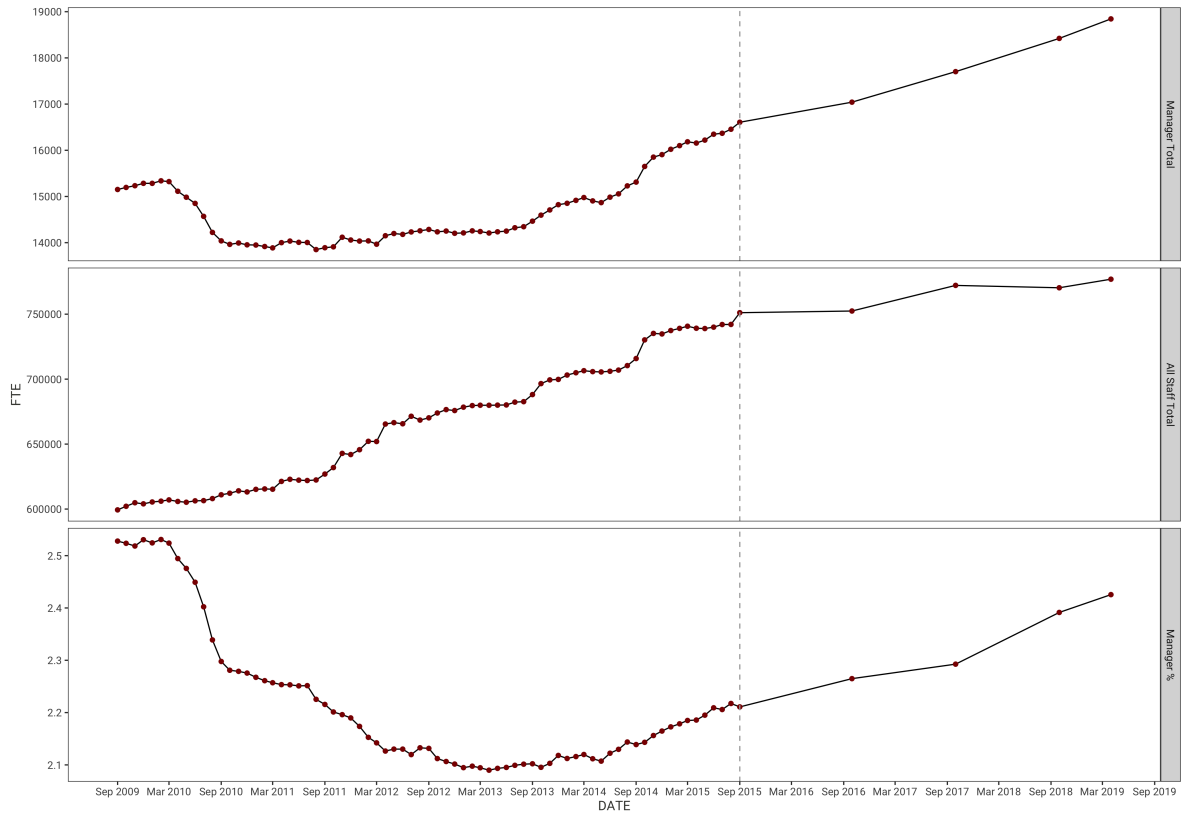

Figure 21: Managers by staff type in all acute NHS hospital trusts in 2016/17

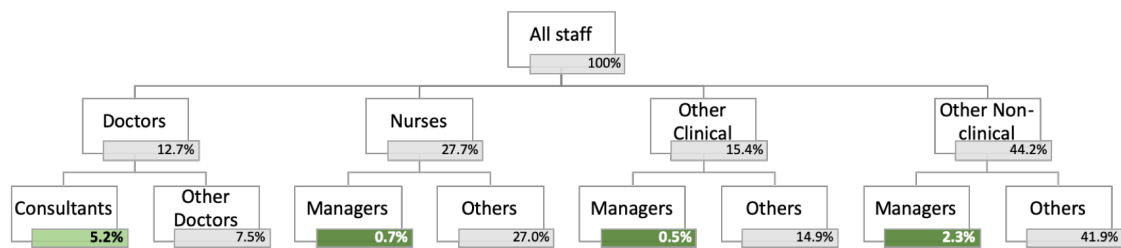

Figure 22: Managers by staff type in all acute NHS hospital trusts in 2017/18

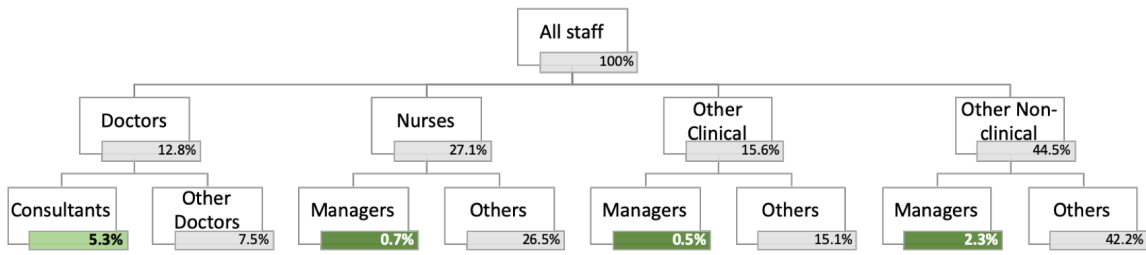

Figure 23: Managers by staff type in all acute NHS hospital trusts in 2018/19

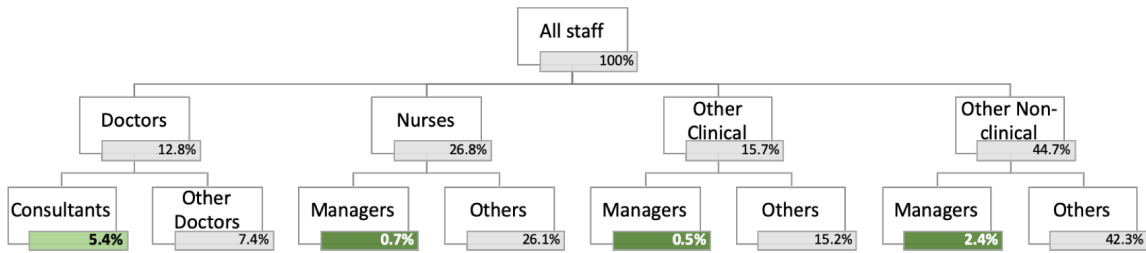

Figure 24: Managers by agenda for change pay grade in all acute NHS hospital trusts in 2016/17

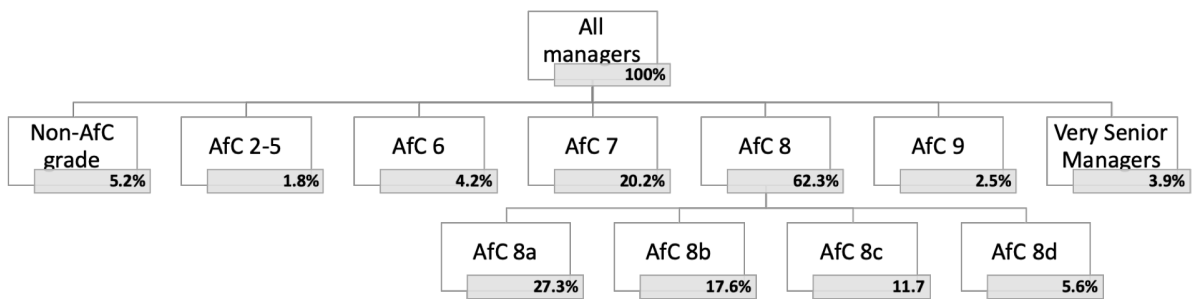

Figure 25: Managers by agenda for change pay grade in all acute NHS hospital trusts in 2017/18

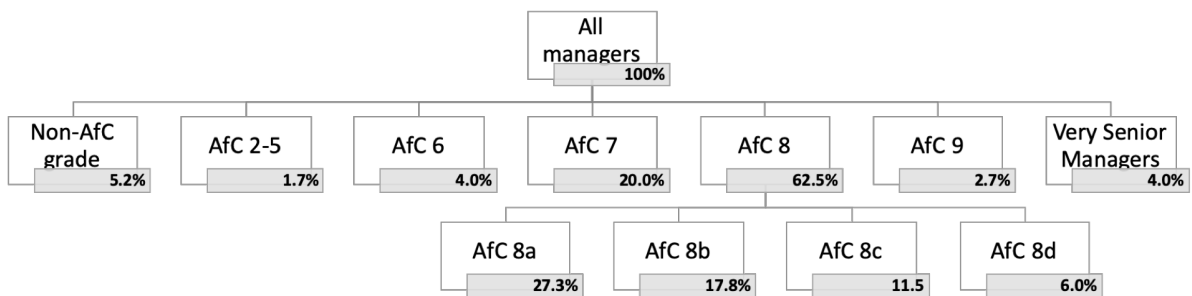

Figure 26: Managers by agenda for change pay grade in all acute NHS hospital trusts in 2018/19

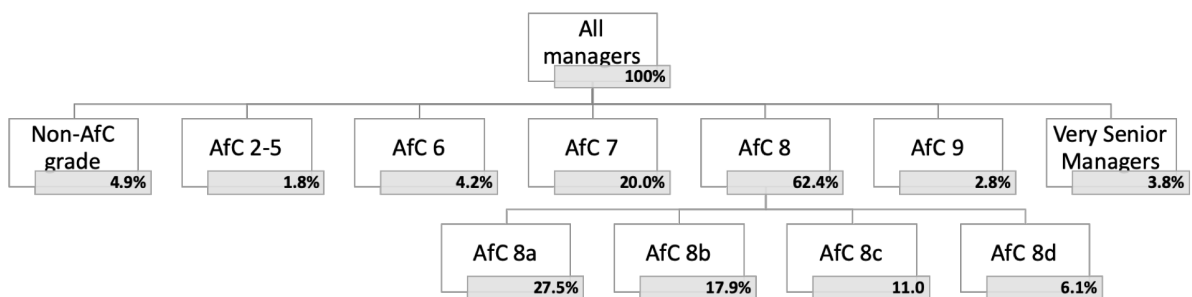



Figure 27: Cross tabulation of agenda for change pay grade and staff type in all acute NHS hospital trusts in 2016/17

|                                             | Non AFC Grade | Band 2       | Band 3       | Band 4       | Band 5       | Band 6       | Band 7        | Band 8a       | Band 8b       | Band 8c       | Band 8d      | Band 9       | Very Senior Manager | Total          |
|---------------------------------------------|---------------|--------------|--------------|--------------|--------------|--------------|---------------|---------------|---------------|---------------|--------------|--------------|---------------------|----------------|
| Manager Central functions                   | 2.92%         | 0.02%        | 0.13%        | 0.18%        | 0.58%        | 2.06%        | 7.70%         | 11.17%        | 8.48%         | 5.77%         | 3.26%        | 1.46%        | 3.53%               | 47.26%         |
| Manager Clinical support                    | 0.68%         | 0.00%        | 0.02%        | 0.07%        | 0.38%        | 0.84%        | 2.02%         | 3.21%         | 2.49%         | 1.76%         | 0.78%        | 0.41%        | 0.20%               | 12.88%         |
| Manager Hotel, property & estates           | 0.22%         | 0.03%        | 0.03%        | 0.02%        | 0.11%        | 0.35%        | 0.94%         | 1.15%         | 0.75%         | 0.49%         | 0.28%        | 0.10%        | 0.12%               | 4.59%          |
| Manager Scientific, therapeutic & technical | 0.06%         | 0.00%        | 0.00%        | 0.02%        | 0.02%        | 0.08%        | 0.24%         | 0.34%         | 0.25%         | 0.17%         | 0.07%        | 0.02%        | 0.01%               | 1.28%          |
| Nurses & health visitors                    | 1.01%         | 0.00%        | 0.00%        | 0.00%        | 0.01%        | 0.55%        | 7.35%         | 5.19%         | 2.41%         | 1.94%         | 0.60%        | 0.16%        | 0.00%               | 19.23%         |
| Scientific, therapeutic & technical staff   | 0.28%         | 0.00%        | 0.00%        | 0.05%        | 0.08%        | 0.30%        | 1.94%         | 6.25%         | 3.25%         | 1.61%         | 0.65%        | 0.35%        | 0.00%               | 14.76%         |
| <b>Total</b>                                | <b>5.17%</b>  | <b>0.05%</b> | <b>0.19%</b> | <b>0.34%</b> | <b>1.18%</b> | <b>4.18%</b> | <b>20.20%</b> | <b>27.32%</b> | <b>17.62%</b> | <b>11.74%</b> | <b>5.63%</b> | <b>2.51%</b> | <b>3.86%</b>        | <b>100.00%</b> |

Figure 28: Cross tabulation of agenda for change pay grade and staff type in all acute NHS hospital trusts in 2017/18

|                                             | Non AFC Grade | Band 2       | Band 3       | Band 4       | Band 5       | Band 6       | Band 7        | Band 8a       | Band 8b       | Band 8c       | Band 8d      | Band 9       | Very Senior Manager | Total          |
|---------------------------------------------|---------------|--------------|--------------|--------------|--------------|--------------|---------------|---------------|---------------|---------------|--------------|--------------|---------------------|----------------|
| Manager Central functions                   | 2.86%         | 0.02%        | 0.07%        | 0.19%        | 0.61%        | 1.91%        | 7.46%         | 11.28%        | 8.75%         | 5.62%         | 3.58%        | 1.59%        | 3.58%               | 47.52%         |
| Manager Clinical support                    | 0.69%         | 0.01%        | 0.02%        | 0.07%        | 0.39%        | 0.88%        | 2.20%         | 3.47%         | 2.53%         | 1.66%         | 0.81%        | 0.39%        | 0.23%               | 13.34%         |
| Manager Hotel, property & estates           | 0.27%         | 0.01%        | 0.01%        | 0.00%        | 0.14%        | 0.35%        | 0.86%         | 1.08%         | 0.68%         | 0.49%         | 0.24%        | 0.10%        | 0.12%               | 4.35%          |
| Manager Scientific, therapeutic & technical | 0.04%         | 0.00%        | 0.00%        | 0.01%        | 0.02%        | 0.09%        | 0.24%         | 0.33%         | 0.21%         | 0.17%         | 0.07%        | 0.02%        | 0.02%               | 1.21%          |
| Nurses & health visitors                    | 1.05%         | 0.00%        | 0.00%        | 0.00%        | 0.01%        | 0.50%        | 7.26%         | 4.93%         | 2.45%         | 1.94%         | 0.64%        | 0.23%        | 0.00%               | 19.00%         |
| Scientific, therapeutic & technical staff   | 0.29%         | 0.00%        | 0.00%        | 0.05%        | 0.06%        | 0.31%        | 1.96%         | 6.20%         | 3.13%         | 1.58%         | 0.63%        | 0.35%        | 0.00%               | 14.57%         |
| <b>Total</b>                                | <b>5.20%</b>  | <b>0.04%</b> | <b>0.11%</b> | <b>0.32%</b> | <b>1.23%</b> | <b>4.03%</b> | <b>19.98%</b> | <b>27.29%</b> | <b>17.75%</b> | <b>11.46%</b> | <b>5.97%</b> | <b>2.68%</b> | <b>3.95%</b>        | <b>100.00%</b> |

Figure 29: Cross tabulation of agenda for change pay grade and staff type in all acute NHS hospital trusts in 2018/19

|                                             | Non AFC Grade | Band 2       | Band 3       | Band 4       | Band 5       | Band 6       | Band 7        | Band 8a       | Band 8b       | Band 8c       | Band 8d      | Band 9       | Very Senior Manager | Total          |
|---------------------------------------------|---------------|--------------|--------------|--------------|--------------|--------------|---------------|---------------|---------------|---------------|--------------|--------------|---------------------|----------------|
| Manager Central functions                   | 2.64%         | 0.04%        | 0.09%        | 0.20%        | 0.64%        | 2.11%        | 7.61%         | 11.45%        | 8.86%         | 5.48%         | 3.53%        | 1.67%        | 3.51%               | 47.82%         |
| Manager Clinical support                    | 0.67%         | 0.01%        | 0.02%        | 0.03%        | 0.45%        | 0.92%        | 2.24%         | 3.53%         | 2.51%         | 1.58%         | 0.91%        | 0.42%        | 0.18%               | 13.48%         |
| Manager Hotel, property & estates           | 0.31%         | 0.01%        | 0.00%        | 0.02%        | 0.14%        | 0.29%        | 0.86%         | 1.13%         | 0.72%         | 0.52%         | 0.26%        | 0.09%        | 0.13%               | 4.47%          |
| Manager Scientific, therapeutic & technical | 0.04%         | 0.00%        | 0.00%        | 0.01%        | 0.01%        | 0.09%        | 0.23%         | 0.30%         | 0.23%         | 0.15%         | 0.09%        | 0.02%        | 0.01%               | 1.17%          |
| Nurses & health visitors                    | 0.99%         | 0.00%        | 0.00%        | 0.00%        | 0.00%        | 0.57%        | 7.28%         | 4.93%         | 2.52%         | 1.85%         | 0.68%        | 0.27%        | 0.00%               | 19.09%         |
| Scientific, therapeutic & technical staff   | 0.27%         | 0.00%        | 0.00%        | 0.04%        | 0.06%        | 0.24%        | 1.81%         | 6.11%         | 3.03%         | 1.47%         | 0.59%        | 0.33%        | 0.00%               | 13.94%         |
| <b>Total</b>                                | <b>4.92%</b>  | <b>0.06%</b> | <b>0.11%</b> | <b>0.30%</b> | <b>1.30%</b> | <b>4.23%</b> | <b>20.03%</b> | <b>27.46%</b> | <b>17.87%</b> | <b>11.03%</b> | <b>6.06%</b> | <b>2.79%</b> | <b>3.84%</b>        | <b>100.00%</b> |

Figure 30: Distribution of key variables across all acute NHS hospital trusts in 2016/17

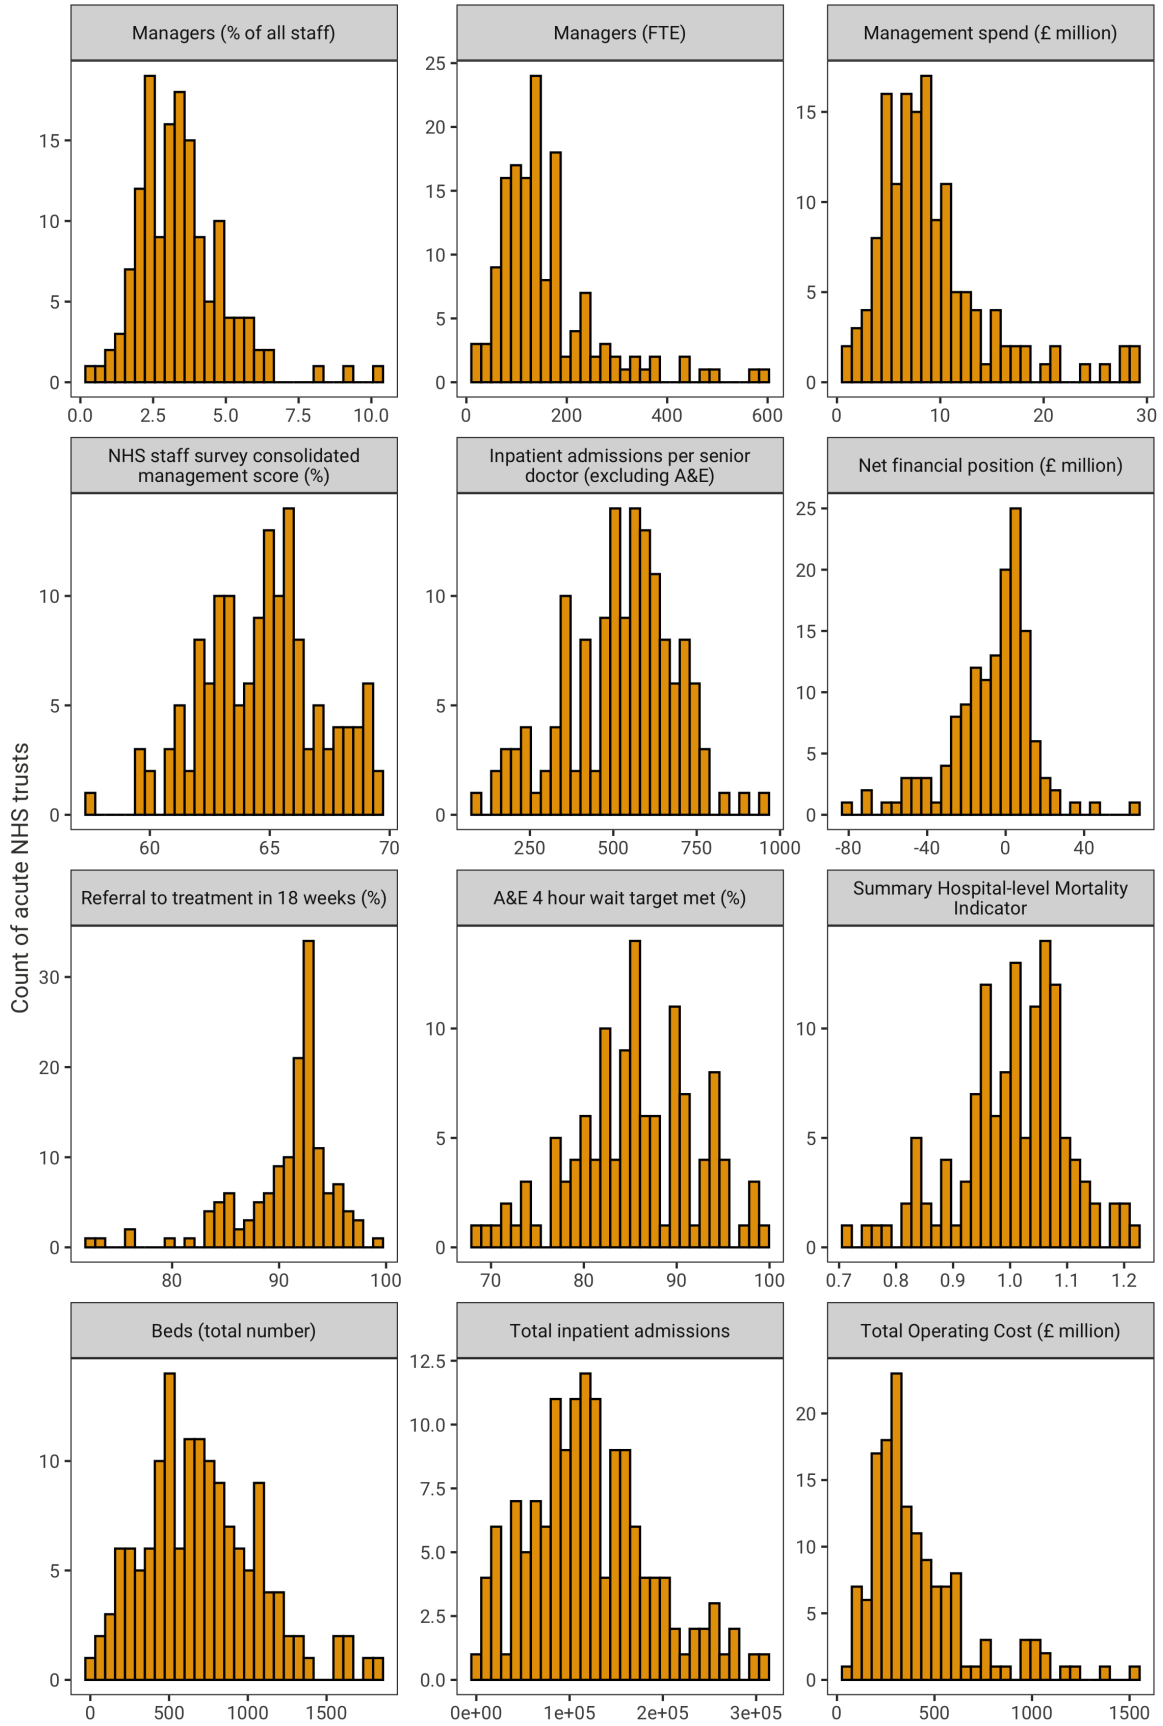

Figure 31: Distribution of key variables across all acute NHS hospital trusts in 2017/18

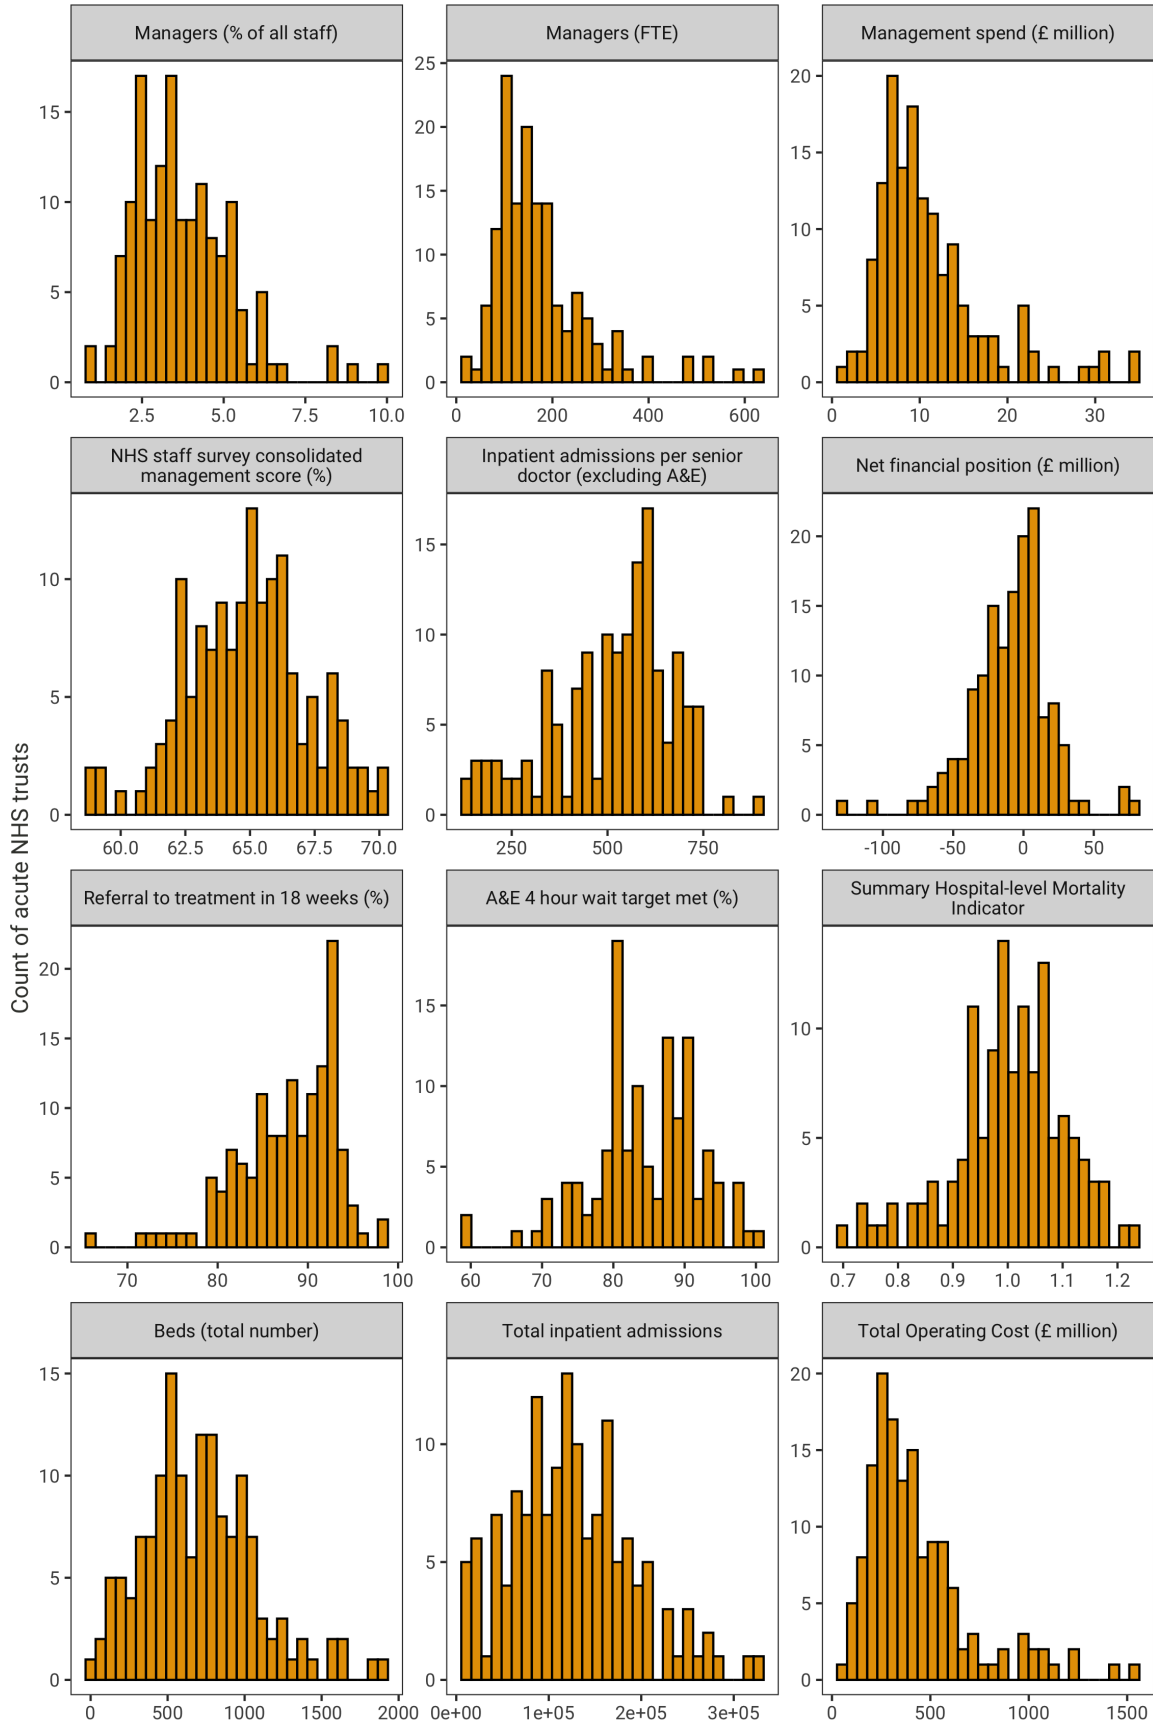

Figure 32: Distribution of key variables across all acute NHS hospital trusts in 2018/19

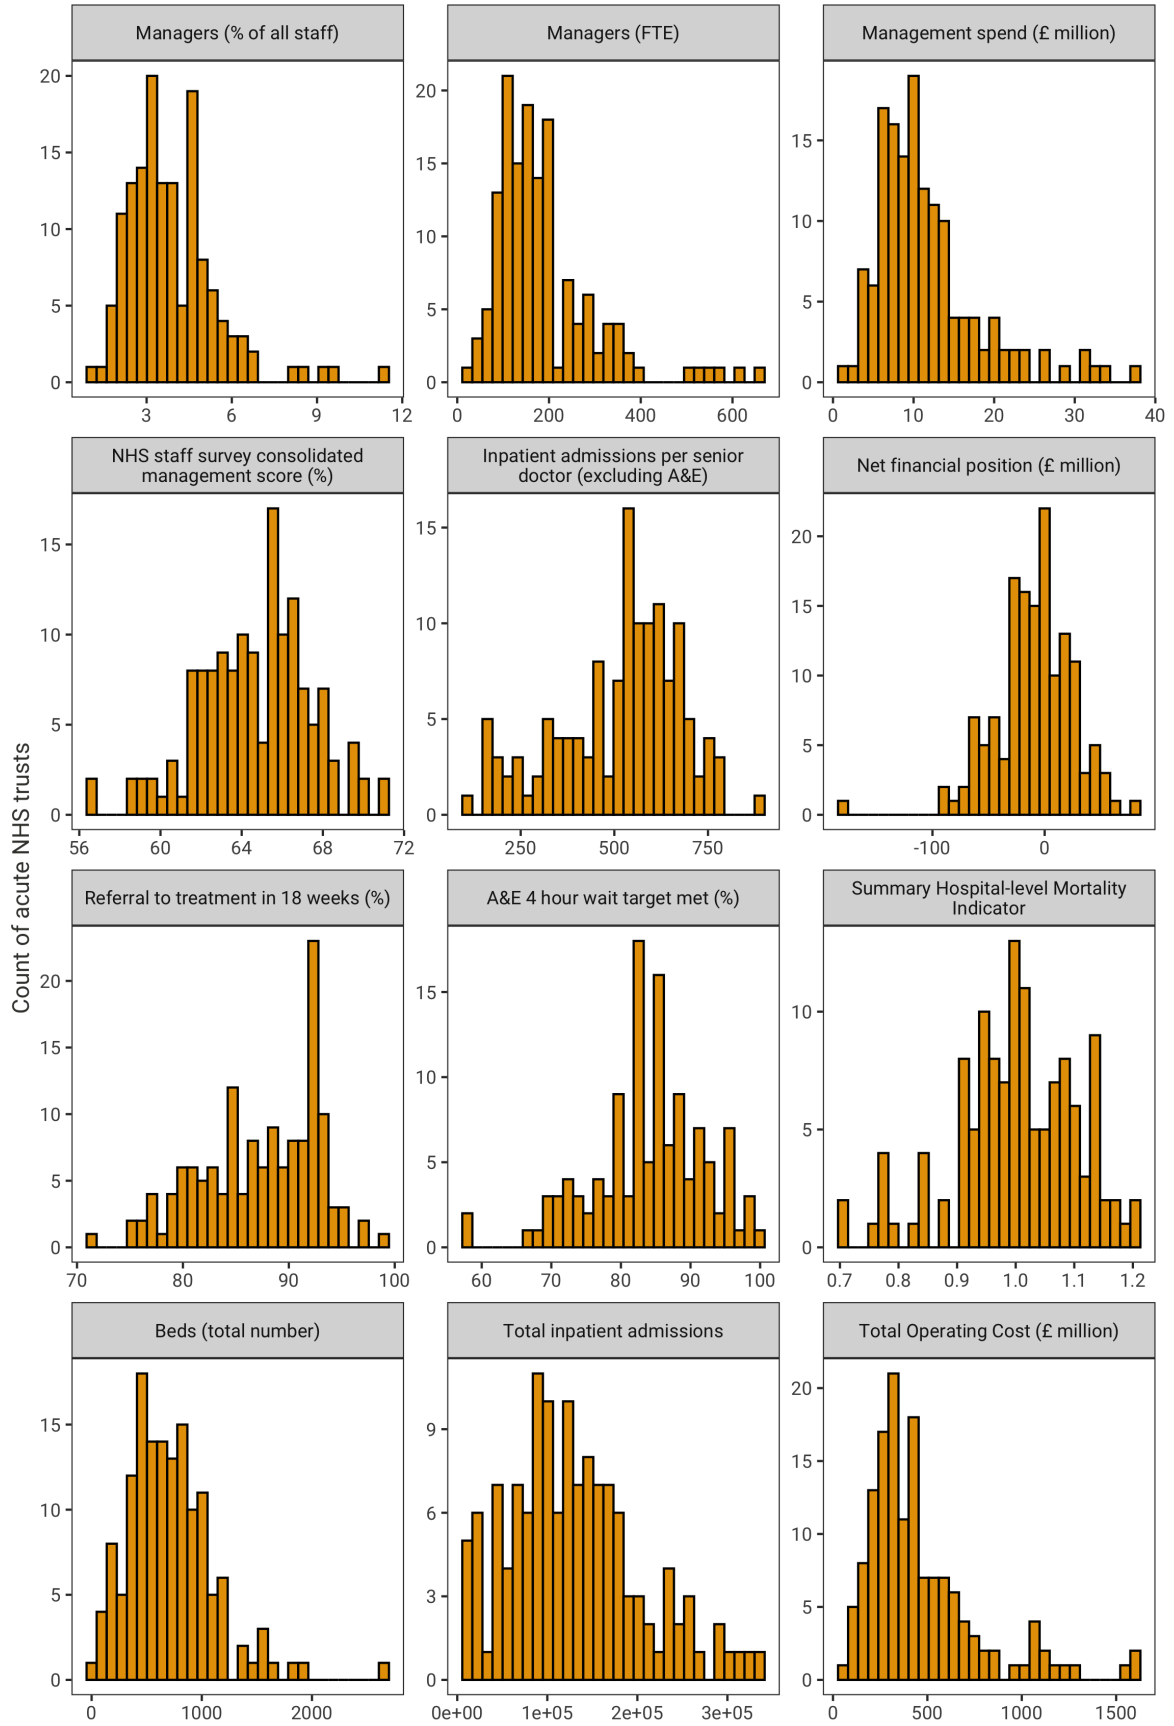

Figure 33: Relationship between management input (%) and resources to be managed across all acute NHS hospital trusts in 2016/17

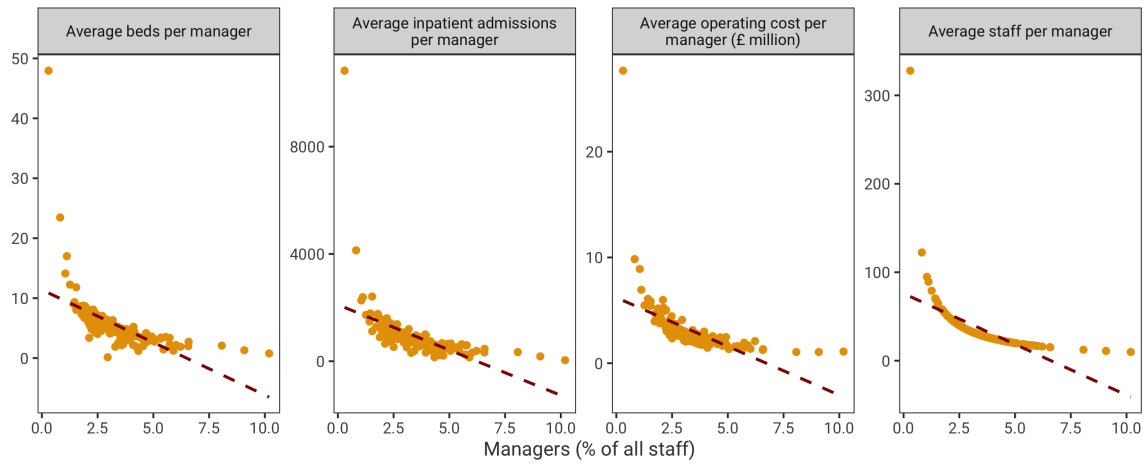

Figure 34: Relationship between management input (%) and resources to be managed across all acute NHS hospital trusts in 2017/18

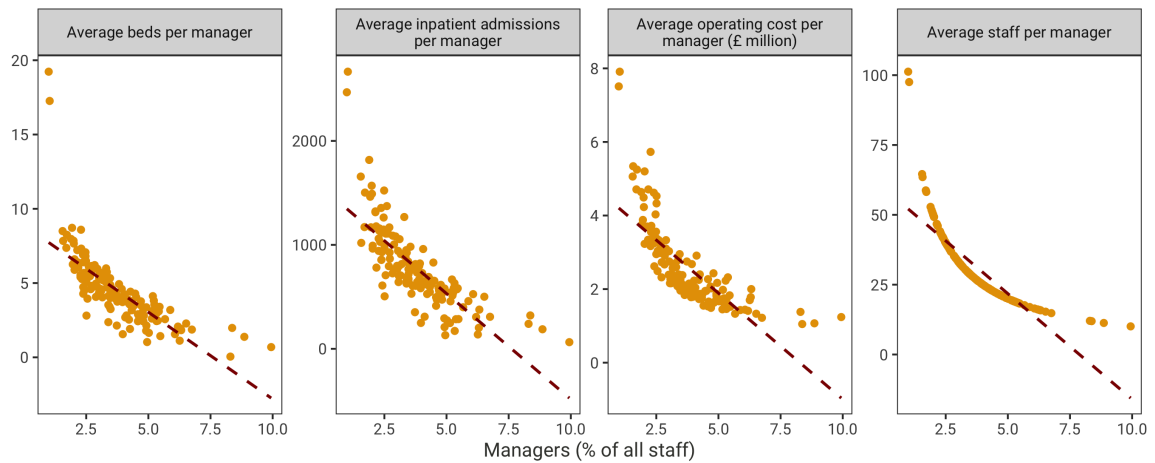

Figure 35: Relationship between management input (%) and resources to be managed across all acute NHS hospital trusts in 2018/19

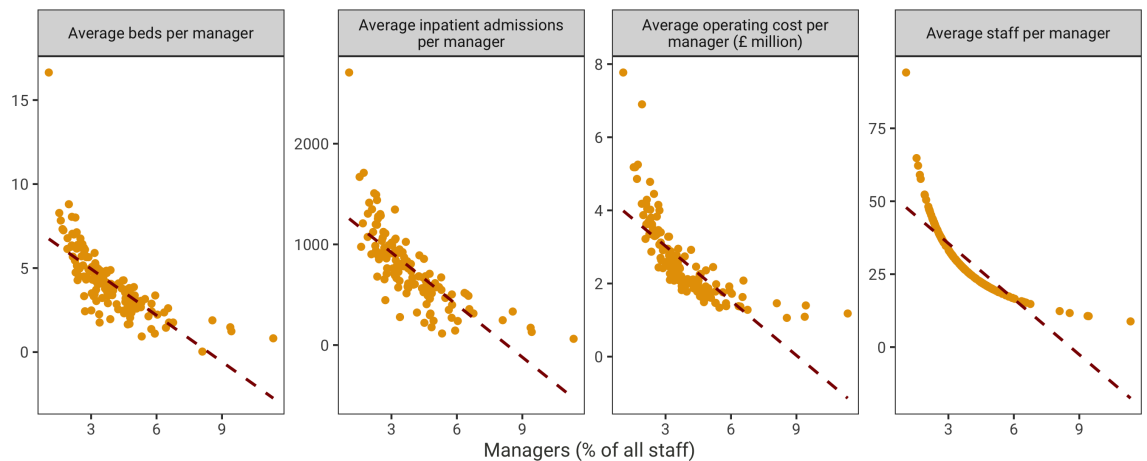

Figure 36: Relationship between management input (FTE) and resources to be managed across all acute NHS hospital trusts in 2016/17

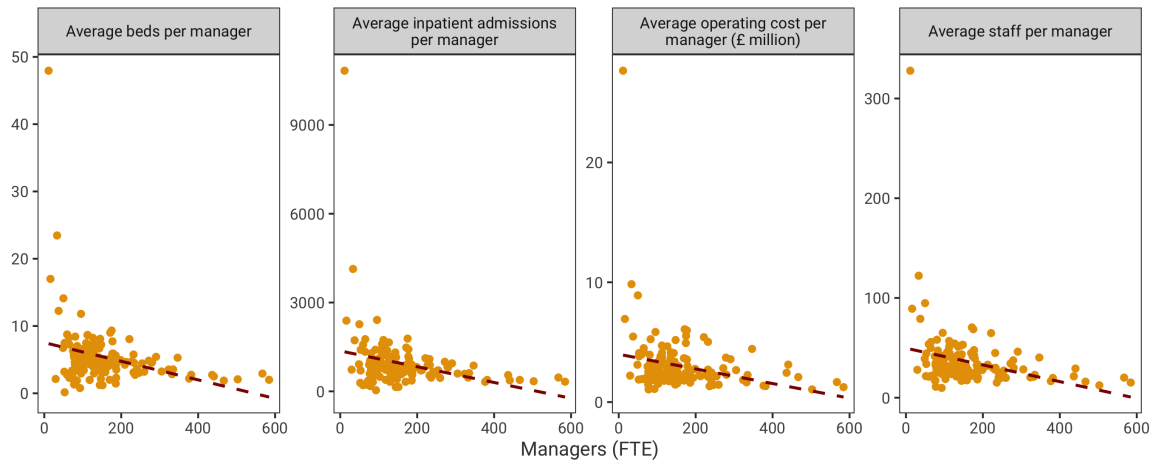

Figure 37: Relationship between management input (FTE) and resources to be managed across all acute NHS hospital trusts in 2017/18

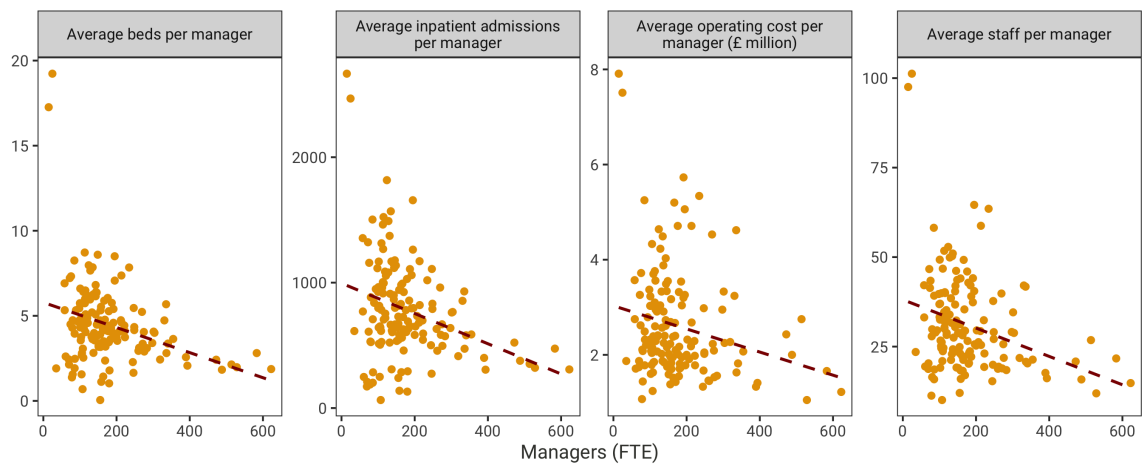

Figure 38: Relationship between management input (FTE) and resources to be managed across all acute NHS hospital trusts in 2018/19

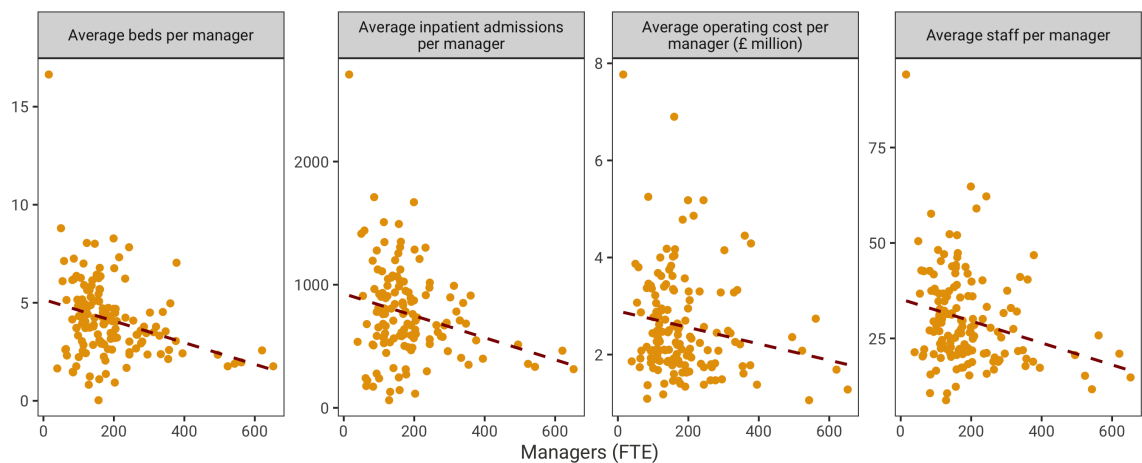

Table 4: Inpatient admissions per senior doctor (excluding A&E) against Management (FTE)

|                                                               | <i>Dependent variable:</i>                             |                                 |                                 |                                  |                                         |                                                     |                                  |                                         |                                                     |
|---------------------------------------------------------------|--------------------------------------------------------|---------------------------------|---------------------------------|----------------------------------|-----------------------------------------|-----------------------------------------------------|----------------------------------|-----------------------------------------|-----------------------------------------------------|
|                                                               | Inpatient admissions per senior doctor (excluding A&E) |                                 |                                 |                                  |                                         |                                                     |                                  |                                         |                                                     |
|                                                               | <i>cross-section</i><br>2016/17                        | <i>cross-section</i><br>2017/18 | <i>cross-section</i><br>2018/19 | <i>pooled</i><br>2016/17-2018/19 | <i>fixed effects</i><br>2016/17-2018/19 | <i>lagged dependent variable</i><br>2016/17-2018/19 | <i>pooled</i><br>2016/17-2018/19 | <i>fixed effects</i><br>2016/17-2018/19 | <i>lagged dependent variable</i><br>2016/17-2018/19 |
| (1)                                                           | (2)                                                    | (3)                             | (4)                             | (5)                              | (6)                                     | (7)                                                 | (8)                              | (9)                                     |                                                     |
| Managers (FTE)                                                | -0.225<br>(0.191)                                      | -0.323<br>(0.197)               | -0.248<br>(0.204)               | -0.263**<br>(0.109)              | -0.264***<br>(0.092)                    | -0.083<br>(0.069)                                   |                                  |                                         |                                                     |
| Managers (FTE) squared                                        | 0.0004<br>(0.0003)                                     | 0.001*<br>(0.0003)              | 0.0004<br>(0.0003)              | 0.0004***<br>(0.0002)            | 0.001***<br>(0.0002)                    | 0.0002<br>(0.0001)                                  |                                  |                                         |                                                     |
| Managers (FTE - basic definition)                             |                                                        |                                 |                                 |                                  |                                         |                                                     | -0.343**<br>(0.143)              | -0.412**<br>(0.175)                     | -0.120<br>(0.089)                                   |
| Managers (FTE basic definition) squared                       |                                                        |                                 |                                 |                                  |                                         |                                                     | 0.001**<br>(0.0003)              | 0.002***<br>(0.0004)                    | 0.0002<br>(0.0002)                                  |
| Senior doctors (FTE)                                          | -1.803***<br>(0.173)                                   | -1.715***<br>(0.164)            | -1.487***<br>(0.164)            | -1.635***<br>(0.092)             | -1.788***<br>(0.111)                    | -0.435***<br>(0.071)                                | -1.597***<br>(0.089)             | -1.795***<br>(0.112)                    | -0.423***<br>(0.068)                                |
| NHS staff survey consolidated management score (%)            | -2.035<br>(2.288)                                      | 0.974<br>(2.325)                | -0.429<br>(2.127)               | -0.440<br>(1.242)                | -1.348<br>(0.865)                       | 0.263<br>(0.763)                                    | -0.155<br>(1.245)                | -1.083<br>(0.868)                       | 0.430<br>(0.765)                                    |
| Beds (total number)                                           | 0.006<br>(0.062)                                       | -0.029<br>(0.051)               | 0.018<br>(0.046)                | -0.008<br>(0.028)                | 0.046<br>(0.036)                        | -0.041**<br>(0.016)                                 | -0.009<br>(0.028)                | 0.038<br>(0.036)                        | -0.041**<br>(0.016)                                 |
| Total Operating Cost (£ million)                              | 0.415***<br>(0.090)                                    | 0.459***<br>(0.094)             | 0.293***<br>(0.100)             | 0.377***<br>(0.053)              | 0.098<br>(0.069)                        | 0.105***<br>(0.035)                                 | 0.358***<br>(0.052)              | 0.110<br>(0.069)                        | 0.101***<br>(0.034)                                 |
| Total inpatient admissions                                    | 0.002***<br>(0.0003)                                   | 0.002***<br>(0.0003)            | 0.002***<br>(0.0002)            | 0.002***<br>(0.0001)             | 0.003***<br>(0.0002)                    | 0.001***<br>(0.0001)                                | 0.002***<br>(0.0001)             | 0.003***<br>(0.0002)                    | 0.001***<br>(0.0001)                                |
| Female share of inpatient admissions (%)                      | -0.156<br>(1.621)                                      | 0.109<br>(1.470)                | -0.457<br>(1.461)               | -0.070<br>(0.847)                | -3.001**<br>(1.254)                     | -0.692<br>(0.508)                                   | 0.019<br>(0.846)                 | -2.874**<br>(1.255)                     | -0.695<br>(0.509)                                   |
| Inpatient admissions age 0-14 (%)                             | -7.520<br>(6.691)                                      | 9.336<br>(6.955)                | 5.166<br>(6.823)                | 2.099<br>(3.717)                 | -1.648<br>(1.993)                       | 2.406<br>(2.361)                                    | 2.063<br>(3.712)                 | -2.282<br>(2.002)                       | 2.245<br>(2.366)                                    |
| Inpatient admissions age 15-29 (%)                            | 8.449<br>(7.166)                                       | 25.601***<br>(7.484)            | 18.313**<br>(7.385)             | 17.281***<br>(4.020)             | -0.208<br>(2.430)                       | 4.731*<br>(2.627)                                   | 17.323***<br>(4.018)             | -0.270<br>(2.436)                       | 4.650*<br>(2.636)                                   |
| Inpatient admissions age 30-44 (%)                            | -10.705<br>(7.094)                                     | 3.882<br>(7.519)                | 3.250<br>(7.780)                | -1.564<br>(4.062)                | -1.547<br>(2.632)                       | 1.525<br>(2.600)                                    | -1.871<br>(4.055)                | -1.836<br>(2.627)                       | 1.268<br>(2.606)                                    |
| Inpatient admissions age 45-59 (%)                            | -11.444<br>(7.323)                                     | 6.544<br>(7.477)                | -0.183<br>(7.355)               | -2.040<br>(4.029)                | 1.905<br>(2.196)                        | 2.770<br>(2.548)                                    | -1.905<br>(4.021)                | 1.215<br>(2.190)                        | 2.654<br>(2.554)                                    |
| Inpatient admissions age 60-74 (%)                            | -11.848*<br>(7.002)                                    | 5.193<br>(7.277)                | 3.084<br>(7.067)                | -1.287<br>(3.893)                | -1.670<br>(2.278)                       | 1.230<br>(2.448)                                    | -1.398<br>(3.896)                | -1.036<br>(2.274)                       | 1.083<br>(2.457)                                    |
| Inpatient admissions age 75-89 (%)                            | 5.231<br>(7.619)                                       | 20.785***<br>(10.543)           | 14.873*<br>(7.864)              | 13.384***<br>(4.201)             | 0.559<br>(2.220)                        | 4.013<br>(2.712)                                    | 13.512***<br>(4.190)             | 1.389<br>(2.207)                        | 3.863<br>(2.718)                                    |
| Inpatient admissions age 90+ (%)                              | -21.492**<br>(10.261)                                  | -4.449<br>(10.543)              | -5.803<br>(11.716)              | -10.817*<br>(5.995)              | -1.552<br>(3.641)                       | 1.294<br>(3.812)                                    | -10.463*<br>(5.981)              | -1.399<br>(3.644)                       | 1.104<br>(3.821)                                    |
| Specialist status                                             | -153.576***<br>(33.274)                                | -186.125***<br>(31.308)         | -184.187***<br>(34.030)         | -177.400***<br>(18.350)          |                                         | -46.646***<br>(12.332)                              | -174.655***<br>(18.415)          |                                         | -47.157***<br>(12.359)                              |
| Financial Year 2017/18                                        |                                                        |                                 |                                 | 0.886<br>(6.741)                 |                                         |                                                     | -0.331<br>(6.690)                |                                         |                                                     |
| Financial Year 2018/19                                        |                                                        |                                 |                                 | 1.906<br>(7.182)                 |                                         |                                                     | 1.232<br>(7.124)                 |                                         |                                                     |
| Lagged Inpatient admissions per senior doctor (excluding A&E) |                                                        |                                 |                                 |                                  |                                         | 0.774***<br>(0.028)                                 |                                  |                                         | 0.772***<br>(0.028)                                 |
| Constant                                                      | 1,284.398*<br>(712.702)                                | -578.544<br>(703.177)           | -40.978<br>(706.050)            | 237.150<br>(385.910)             |                                         | -119.176<br>(241.330)                               | 212.452<br>(385.684)             |                                         | -114.564<br>(242.014)                               |
| Observations                                                  | 151                                                    | 149                             | 133                             | 433                              | 433                                     | 282                                                 | 433                              | 433                                     | 282                                                 |
| R <sup>2</sup>                                                | 0.879                                                  | 0.885                           | 0.888                           | 0.880                            | 0.667                                   | 0.971                                               | 0.880                            | 0.668                                   | 0.970                                               |
| Adjusted R <sup>2</sup>                                       | 0.865                                                  | 0.871                           | 0.873                           | 0.875                            | 0.457                                   | 0.969                                               | 0.874                            | 0.458                                   | 0.969                                               |
| F Statistic                                                   | 61.099*** (df = 16; 134)                               | 63.282*** (df = 16; 132)        | 57.568*** (df = 16; 116)        | 168.274*** (df = 18; 414)        | 35.355*** (df = 15; 265)                | 512.707*** (df = 17; 264)                           | 168.202*** (df = 18; 414)        | 35.513*** (df = 15; 265)                | 510.784*** (df = 17; 264)                           |

Note:

\*p<0.1; \*\*p<0.05; \*\*\*p<0.01

Table 5: log Inpatient admissions per senior doctor (excluding A&E) against log Management (FTE)

|                                                                   | <i>Dependent variable:</i>                                 |                                 |                                 |                                  |                                         |                                                     |                                  |                                         |                                                     |
|-------------------------------------------------------------------|------------------------------------------------------------|---------------------------------|---------------------------------|----------------------------------|-----------------------------------------|-----------------------------------------------------|----------------------------------|-----------------------------------------|-----------------------------------------------------|
|                                                                   | log Inpatient admissions per senior doctor (excluding A&E) |                                 |                                 |                                  |                                         |                                                     |                                  |                                         |                                                     |
|                                                                   | <i>cross-section</i><br>2016/17                            | <i>cross-section</i><br>2017/18 | <i>cross-section</i><br>2018/19 | <i>pooled</i><br>2016/17-2018/19 | <i>fixed effects</i><br>2016/17-2018/19 | <i>lagged dependent variable</i><br>2016/17-2018/19 | <i>pooled</i><br>2016/17-2018/19 | <i>fixed effects</i><br>2016/17-2018/19 | <i>lagged dependent variable</i><br>2016/17-2018/19 |
| (1)                                                               | (2)                                                        | (3)                             | (4)                             | (5)                              | (6)                                     | (7)                                                 | (8)                              | (9)                                     |                                                     |
| log Managers (FTE)                                                | 0.024<br>(0.028)                                           | 0.071**<br>(0.030)              | 0.094***<br>(0.032)             | 0.055***<br>(0.017)              | 0.003<br>(0.012)                        | 0.035***<br>(0.010)                                 |                                  |                                         |                                                     |
| log Managers (FTE - basic definition)                             |                                                            |                                 |                                 |                                  |                                         |                                                     | 0.064***<br>(0.017)              | 0.003<br>(0.021)                        | 0.023**<br>(0.010)                                  |
| log Senior doctors (FTE)                                          | -0.387***<br>(0.065)                                       | -0.427***<br>(0.064)            | -0.408***<br>(0.064)            | -0.398***<br>(0.036)             | -0.965***<br>(0.061)                    | -0.158***<br>(0.022)                                | -0.409***<br>(0.061)             | -0.965***<br>(0.061)                    | -0.151***<br>(0.022)                                |
| log NHS staff survey consolidated management score (%)            | -0.221<br>(0.348)                                          | -0.337<br>(0.327)               | -0.469<br>(0.292)               | -0.319*<br>(0.180)               | -0.123<br>(0.118)                       | -0.143<br>(0.098)                                   | -0.359**<br>(0.181)              | -0.124<br>(0.118)                       | -0.119<br>(0.100)                                   |
| log Beds (total number)                                           | 0.114**<br>(0.044)                                         | 0.046<br>(0.037)                | 0.016<br>(0.035)                | 0.055**<br>(0.022)               | 0.205***<br>(0.037)                     | -0.025**<br>(0.012)                                 | 0.057***<br>(0.022)              | 0.205***<br>(0.042)                     | -0.024**<br>(0.012)                                 |
| Total Operating Cost (£ million)                                  | -0.001***<br>(0.0001)                                      | -0.001***<br>(0.0001)           | -0.001***<br>(0.0001)           | -0.001***<br>(0.0001)            | -0.0004***<br>(0.0001)                  | -0.0002***<br>(0.00004)                             | -0.001***<br>(0.0001)            | -0.0004***<br>(0.0001)                  | -0.0002***<br>(0.00004)                             |
| Total inpatient admissions                                        | 0.00000***<br>(0.00000)                                    | 0.00000***<br>(0.00000)         | 0.00000***<br>(0.00000)         | 0.00000***<br>(0.00000)          | 0.00001***<br>(0.00000)                 | 0.00000***<br>(0.00000)                             | 0.00000***<br>(0.00000)          | 0.00001***<br>(0.00000)                 | 0.00000***<br>(0.00000)                             |
| Female share of inpatient admissions (%)                          | 0.005<br>(0.004)                                           | 0.001<br>(0.003)                | 0.002<br>(0.003)                | 0.003<br>(0.002)                 | 0.007**<br>(0.003)                      | -0.002<br>(0.001)                                   | 0.002<br>(0.002)                 | 0.007**<br>(0.003)                      | -0.002*<br>(0.001)                                  |
| Inpatient admissions age 0-14 (%)                                 | -0.002<br>(0.015)                                          | 0.026*<br>(0.015)               | 0.018<br>(0.015)                | 0.013<br>(0.008)                 | -0.003<br>(0.004)                       | 0.003<br>(0.005)                                    | 0.011<br>(0.008)                 | -0.003<br>(0.004)                       | 0.003<br>(0.005)                                    |
| Inpatient admissions age 15-29 (%)                                | 0.012<br>(0.017)                                           | 0.047***<br>(0.017)             | 0.035**<br>(0.016)              | 0.029***<br>(0.009)              | -0.020***<br>(0.005)                    | 0.006<br>(0.005)                                    | 0.029***<br>(0.009)              | -0.021***<br>(0.005)                    | 0.006<br>(0.005)                                    |
| Inpatient admissions age 30-44 (%)                                | 0.002<br>(0.016)                                           | 0.023<br>(0.016)                | 0.022<br>(0.017)                | 0.015<br>(0.009)                 | 0.012**<br>(0.006)                      | 0.004<br>(0.005)                                    | 0.013<br>(0.009)                 | 0.012**<br>(0.006)                      | 0.004<br>(0.005)                                    |
| Inpatient admissions age 45-59 (%)                                | -0.018<br>(0.016)                                          | 0.014<br>(0.016)                | 0.002<br>(0.016)                | -0.001<br>(0.009)                | -0.004<br>(0.005)                       | -0.001<br>(0.005)                                   | -0.003<br>(0.009)                | -0.004<br>(0.005)                       | -0.001<br>(0.005)                                   |
| Inpatient admissions age 60-74 (%)                                | -0.023<br>(0.016)                                          | 0.013<br>(0.016)                | 0.009<br>(0.015)                | -0.002<br>(0.009)                | -0.009*<br>(0.005)                      | 0.004<br>(0.005)                                    | -0.005<br>(0.009)                | -0.009*<br>(0.005)                      | 0.004<br>(0.005)                                    |
| Inpatient admissions age 75-89 (%)                                | 0.049***<br>(0.017)                                        | 0.054***<br>(0.017)             | 0.044**<br>(0.017)              | 0.049***<br>(0.009)              | 0.018***<br>(0.005)                     | 0.003<br>(0.006)                                    | 0.047***<br>(0.009)              | 0.018***<br>(0.005)                     | 0.003<br>(0.006)                                    |
| Inpatient admissions age 90+ (%)                                  | -0.077***<br>(0.024)                                       | -0.011<br>(0.023)               | -0.012<br>(0.026)               | -0.037***<br>(0.014)             | -0.010<br>(0.008)                       | 0.003<br>(0.008)                                    | -0.037***<br>(0.014)             | -0.010<br>(0.008)                       | 0.002<br>(0.008)                                    |
| Specialist status                                                 | -0.418***<br>(0.096)                                       | -0.609***<br>(0.084)            | -0.664***<br>(0.091)            | -0.563***<br>(0.051)             |                                         | -0.239***<br>(0.031)                                | -0.561***<br>(0.051)             |                                         | -0.239***<br>(0.031)                                |
| Financial Year 2017/18                                            |                                                            |                                 |                                 | -0.009<br>(0.015)                |                                         |                                                     | -0.005<br>(0.015)                |                                         |                                                     |
| Financial Year 2018/19                                            |                                                            |                                 |                                 | -0.002<br>(0.016)                |                                         |                                                     | 0.001<br>(0.016)                 |                                         |                                                     |
| Lagged log Inpatient admissions per senior doctor (excluding A&E) |                                                            |                                 |                                 |                                  |                                         | 0.761***<br>(0.025)                                 |                                  |                                         | 0.765***<br>(0.025)                                 |
| Constant                                                          | 7.856***<br>(2.298)                                        | 6.237***<br>(2.074)             | 7.607***<br>(1.981)             | 7.231***<br>(1.175)              |                                         | 2.583***<br>(0.656)                                 | 7.613***<br>(1.183)              |                                         | 2.488***<br>(0.668)                                 |
| Observations                                                      | 151                                                        | 149                             | 133                             | 433                              | 433                                     | 282                                                 | 433                              | 433                                     | 282                                                 |
| R <sup>2</sup>                                                    | 0.886                                                      | 0.908                           | 0.917                           | 0.899                            | 0.656                                   | 0.981                                               | 0.900                            | 0.655                                   | 0.981                                               |
| Adjusted R <sup>2</sup>                                           | 0.873                                                      | 0.898                           | 0.906                           | 0.895                            | 0.441                                   | 0.980                                               | 0.896                            | 0.440                                   | 0.979                                               |
| F Statistic                                                       | 69.841*** (df = 15; 135)                                   | 87.837*** (df = 15; 133)        | 86.191*** (df = 15; 117)        | 217.583*** (df = 17; 415)        | 36.155*** (df = 14; 266)                | 853.293*** (df = 16; 265)                           | 219.202*** (df = 17; 415)        | 36.141*** (df = 14; 266)                | 833.108*** (df = 16; 265)                           |

Note:

\*p<0.1; \*\*p<0.05; \*\*\*p<0.01



Table 6: Inpatient admissions per senior doctor (excluding A&E) against Management Spend (£)

|                                                               | <i>Dependent variable:</i>                             |                                 |                                 |                                  |                                         |                                                     |
|---------------------------------------------------------------|--------------------------------------------------------|---------------------------------|---------------------------------|----------------------------------|-----------------------------------------|-----------------------------------------------------|
|                                                               | Inpatient admissions per senior doctor (excluding A&E) |                                 |                                 |                                  |                                         |                                                     |
|                                                               | <i>cross-section</i><br>2016/17                        | <i>cross-section</i><br>2017/18 | <i>cross-section</i><br>2018/19 | <i>pooled</i><br>2016/17-2018/19 | <i>fixed effects</i><br>2016/17-2018/19 | <i>lagged dependent variable</i><br>2016/17-2018/19 |
| (1)                                                           | (2)                                                    | (3)                             | (4)                             | (5)                              | (6)                                     |                                                     |
| Management spend (£ million)                                  | -5.239<br>(3.699)                                      | -8.658**<br>(3.491)             | -6.438<br>(3.886)               | -6.987**<br>(2.016)              | -4.837***<br>(1.504)                    | -1.777<br>(1.300)                                   |
| Management spend (£ million) squared                          | 0.00000<br>(0.00000)                                   | 0.00000***<br>(0.00000)         | 0.00000*<br>(0.00000)           | 0.00000***<br>(0.00000)          | 0.00000***<br>(0.00000)                 | 0.00000<br>(0.00000)                                |
| Senior doctors (FTE)                                          | -1.782***<br>(0.169)                                   | -1.704***<br>(0.157)            | -1.481***<br>(0.159)            | -1.625***<br>(0.089)             | -1.764***<br>(0.110)                    | -0.432***<br>(0.070)                                |
| NHS staff survey consolidated management score (%)            | -1.974<br>(2.277)                                      | 1.427<br>(2.318)                | -0.253<br>(2.138)               | -0.295<br>(1.237)                | -1.435*<br>(0.866)                      | 0.365<br>(0.772)                                    |
| Beds (total number)                                           | 0.016<br>(0.062)                                       | -0.012<br>(0.051)               | 0.025<br>(0.046)                | 0.005<br>(0.028)                 | 0.034<br>(0.036)                        | -0.039**<br>(0.016)                                 |
| Total Operating Cost (£ million)                              | 0.393***<br>(0.091)                                    | 0.438***<br>(0.093)             | 0.286***<br>(0.100)             | 0.360***<br>(0.052)              | 0.131*<br>(0.067)                       | 0.101***<br>(0.035)                                 |
| Total inpatient admissions                                    | 0.002***<br>(0.0003)                                   | 0.002***<br>(0.0003)            | 0.002***<br>(0.0002)            | 0.002***<br>(0.0001)             | 0.003***<br>(0.0002)                    | 0.001***<br>(0.0001)                                |
| Female share of inpatient admissions (%)                      | -0.221<br>(1.618)                                      | -0.023<br>(1.448)               | -0.516<br>(1.451)               | -0.202<br>(0.838)                | -2.860**<br>(1.254)                     | -0.733<br>(0.509)                                   |
| Inpatient admissions age 0-14 (%)                             | -7.482<br>(6.669)                                      | 8.283<br>(6.875)                | 3.883<br>(6.817)                | 1.273<br>(3.683)                 | -1.792<br>(1.996)                       | 2.061<br>(2.370)                                    |
| Inpatient admissions age 15-29 (%)                            | 8.443<br>(7.143)                                       | 24.562***<br>(7.402)            | 16.625**<br>(7.442)             | 16.315***<br>(3.996)             | 0.254<br>(2.434)                        | 4.511*<br>(2.638)                                   |
| Inpatient admissions age 30-44 (%)                            | -10.605<br>(7.064)                                     | 2.830<br>(7.416)                | 2.320<br>(7.733)                | -2.192<br>(4.017)                | -1.848<br>(2.633)                       | 1.175<br>(2.605)                                    |
| Inpatient admissions age 45-59 (%)                            | -11.413<br>(7.294)                                     | 5.482<br>(7.393)                | -1.801<br>(7.382)               | -3.006<br>(3.997)                | 1.423<br>(2.196)                        | 2.380<br>(2.564)                                    |
| Inpatient admissions age 60-74 (%)                            | -11.769*<br>(6.983)                                    | 4.052<br>(7.192)                | 1.691<br>(7.070)                | -2.128<br>(3.861)                | -1.850<br>(2.283)                       | 0.882<br>(2.460)                                    |
| Inpatient admissions age 75-89 (%)                            | 5.099<br>(7.598)                                       | 19.687**<br>(7.632)             | 13.877*<br>(7.838)              | 12.523***<br>(4.159)             | 1.027<br>(2.216)                        | 3.740<br>(2.720)                                    |
| Inpatient admissions age 90+ (%)                              | -20.835**<br>(10.211)                                  | -5.028<br>(10.383)              | -7.797<br>(11.737)              | -11.496*<br>(5.934)              | -1.984<br>(3.638)                       | 0.861<br>(3.826)                                    |
| Specialist status                                             | -151.678***<br>(33.204)                                | -179.579***<br>(30.664)         | -180.631***<br>(33.625)         | -173.595***<br>(18.081)          |                                         | -46.694***<br>(12.243)                              |
| Financial Year 2017/18                                        |                                                        |                                 |                                 | 2.265<br>(6.771)                 |                                         |                                                     |
| Financial Year 2018/19                                        |                                                        |                                 |                                 | 4.039<br>(7.222)                 |                                         |                                                     |
| Lagged Inpatient admissions per senior doctor (excluding A&E) |                                                        |                                 |                                 |                                  |                                         | 0.769***<br>(0.028)                                 |
| Constant                                                      | 1.284.484*<br>(710.179)                                | -482.471<br>(698.340)           | 93.502<br>(707.124)             | 327.374<br>(383.306)             |                                         | -87.326<br>(243.227)                                |
| Observations                                                  | 151                                                    | 149                             | 133                             | 433                              | 433                                     | 282                                                 |
| R <sup>2</sup>                                                | 0.880                                                  | 0.888                           | 0.890                           | 0.882                            | 0.666                                   | 0.971                                               |
| Adjusted R <sup>2</sup>                                       | 0.866                                                  | 0.875                           | 0.874                           | 0.877                            | 0.455                                   | 0.969                                               |
| F Statistic                                                   | 61.474*** (df = 16; 134)                               | 65.522*** (df = 16; 132)        | 58.477*** (df = 16; 116)        | 171.875*** (df = 18; 414)        | 35.213*** (df = 15; 265)                | 511.939*** (df = 17; 264)                           |

Note:

\*p<0.1; \*\*p<0.05; \*\*\*p<0.01

Table 7: log Inpatient admissions per senior doctor (excluding A&E) against log Management Spend (£)

|                                                                   | <i>Dependent variable:</i>                                 |                                 |                                 |                                  |                                         |                                                     |
|-------------------------------------------------------------------|------------------------------------------------------------|---------------------------------|---------------------------------|----------------------------------|-----------------------------------------|-----------------------------------------------------|
|                                                                   | log Inpatient admissions per senior doctor (excluding A&E) |                                 |                                 |                                  |                                         |                                                     |
|                                                                   | <i>cross-section</i><br>2016/17                            | <i>cross-section</i><br>2017/18 | <i>cross-section</i><br>2018/19 | <i>pooled</i><br>2016/17-2018/19 | <i>fixed effects</i><br>2016/17-2018/19 | <i>lagged dependent variable</i><br>2016/17-2018/19 |
| (1)                                                               | (2)                                                        | (3)                             | (4)                             | (5)                              | (6)                                     |                                                     |
| log Management spend (£ million)                                  | 0.026<br>(0.033)                                           | 0.117***<br>(0.032)             | 0.134***<br>(0.033)             | 0.081***<br>(0.018)              | 0.003<br>(0.010)                        | 0.046***<br>(0.011)                                 |
| log Senior doctors (FTE)                                          | -0.386***<br>(0.065)                                       | -0.470***<br>(0.063)            | -0.449***<br>(0.064)            | -0.416***<br>(0.036)             | -0.965***<br>(0.061)                    | -0.174***<br>(0.023)                                |
| log NHS staff survey consolidated management score (%)            | -0.218<br>(0.348)                                          | -0.447<br>(0.321)               | -0.553*<br>(0.284)              | -0.365**<br>(0.179)              | -0.122<br>(0.118)                       | -0.170*<br>(0.098)                                  |
| log Beds (total number)                                           | 0.111**<br>(0.045)                                         | 0.054<br>(0.036)                | 0.027<br>(0.034)                | 0.055**<br>(0.022)               | 0.206***<br>(0.043)                     | -0.020*<br>(0.011)                                  |
| Total Operating Cost (£ million)                                  | -0.001***<br>(0.0001)                                      | -0.001***<br>(0.0001)           | -0.001***<br>(0.0001)           | -0.001***<br>(0.0001)            | -0.0004***<br>(0.0001)                  | -0.0002***<br>(0.00004)                             |
| Total inpatient admissions                                        | 0.00000***<br>(0.00000)                                    | 0.00000***<br>(0.00000)         | 0.00000***<br>(0.00000)         | 0.00000***<br>(0.00000)          | 0.00001***<br>(0.00000)                 | 0.00000***<br>(0.00000)                             |
| Female share of inpatient admissions (%)                          | 0.005<br>(0.004)                                           | -0.0001<br>(0.003)              | -0.0005<br>(0.003)              | 0.002<br>(0.002)                 | 0.007**<br>(0.003)                      | -0.002*<br>(0.001)                                  |
| Inpatient admissions age 0-14 (%)                                 | -0.002<br>(0.015)                                          | 0.021<br>(0.015)                | 0.016<br>(0.014)                | 0.012<br>(0.008)                 | -0.003<br>(0.004)                       | 0.003<br>(0.005)                                    |
| Inpatient admissions age 15-29 (%)                                | 0.012<br>(0.017)                                           | 0.043***<br>(0.016)             | 0.035**<br>(0.015)              | 0.029***<br>(0.009)              | -0.020***<br>(0.005)                    | 0.005<br>(0.005)                                    |
| Inpatient admissions age 30-44 (%)                                | 0.001<br>(0.016)                                           | 0.019<br>(0.016)                | 0.019<br>(0.016)                | 0.013<br>(0.009)                 | 0.011**<br>(0.006)                      | 0.003<br>(0.005)                                    |
| Inpatient admissions age 45-59 (%)                                | -0.018<br>(0.016)                                          | 0.010<br>(0.016)                | 0.001<br>(0.015)                | -0.002<br>(0.009)                | -0.004<br>(0.005)                       | -0.001<br>(0.005)                                   |
| Inpatient admissions age 60-74 (%)                                | -0.024<br>(0.016)                                          | 0.009<br>(0.016)                | 0.007<br>(0.015)                | -0.004<br>(0.009)                | -0.009*<br>(0.005)                      | 0.003<br>(0.005)                                    |
| Inpatient admissions age 75-89 (%)                                | 0.049***<br>(0.017)                                        | 0.049***<br>(0.017)             | 0.040**<br>(0.017)              | 0.048***<br>(0.009)              | 0.018***<br>(0.005)                     | 0.003<br>(0.006)                                    |
| Inpatient admissions age 90+ (%)                                  | -0.078***<br>(0.024)                                       | -0.013<br>(0.022)               | -0.010<br>(0.025)               | -0.037***<br>(0.013)             | -0.010<br>(0.008)                       | 0.002<br>(0.008)                                    |
| Specialist status                                                 | -0.422***<br>(0.096)                                       | -0.608***<br>(0.082)            | -0.672***<br>(0.088)            | -0.564***<br>(0.050)             |                                         | -0.247***<br>(0.030)                                |
| Financial Year 2017/18                                            |                                                            |                                 |                                 | -0.017<br>(0.015)                |                                         |                                                     |
| Financial Year 2018/19                                            |                                                            |                                 |                                 | -0.010<br>(0.016)                |                                         |                                                     |
| Lagged log Inpatient admissions per senior doctor (excluding A&E) |                                                            |                                 |                                 |                                  |                                         | 0.749***<br>(0.025)                                 |
| Constant                                                          | 7.945***<br>(2.299)                                        | 7.456***<br>(2.073)             | 8.474***<br>(1.950)             | 7.736***<br>(1.175)              |                                         | 2.962***<br>(0.667)                                 |
| Observations                                                      | 151                                                        | 149                             | 133                             | 433                              | 433                                     | 282                                                 |
| R <sup>2</sup>                                                    | 0.886                                                      | 0.913                           | 0.922                           | 0.901                            | 0.655                                   | 0.981                                               |
| Adjusted R <sup>2</sup>                                           | 0.873                                                      | 0.903                           | 0.912                           | 0.897                            | 0.441                                   | 0.980                                               |
| F Statistic                                                       | 69.751*** (df = 15; 135)                                   | 92.960*** (df = 15; 133)        | 91.845*** (df = 15; 117)        | 222.542*** (df = 17; 415)        | 36.151*** (df = 14; 266)                | 870.298*** (df = 16; 265)                           |

Note:

\*p<0.1; \*\*p<0.05; \*\*\*p<0.01

Table 8: Net financial position (£ million) against Management (FTE)

|                                                    | <i>Dependent variable:</i>         |                                 |                                 |                                  |                                         |                                                     |                                  |                                         |                                                     |
|----------------------------------------------------|------------------------------------|---------------------------------|---------------------------------|----------------------------------|-----------------------------------------|-----------------------------------------------------|----------------------------------|-----------------------------------------|-----------------------------------------------------|
|                                                    | Net financial position (£ million) |                                 |                                 |                                  |                                         |                                                     |                                  |                                         |                                                     |
|                                                    | <i>cross-section</i><br>2016/17    | <i>cross-section</i><br>2017/18 | <i>cross-section</i><br>2018/19 | <i>pooled</i><br>2016/17-2018/19 | <i>fixed effects</i><br>2016/17-2018/19 | <i>lagged dependent variable</i><br>2016/17-2018/19 | <i>pooled</i><br>2015/13-2018/19 | <i>fixed effects</i><br>2012/13-2018/19 | <i>lagged dependent variable</i><br>2012/13-2018/19 |
| (1)                                                | (2)                                | (3)                             | (4)                             | (5)                              | (6)                                     | (7)                                                 | (8)                              | (9)                                     |                                                     |
| Managers (FTE)                                     | -0.088<br>(0.059)                  | -0.005<br>(0.080)               | -0.0005<br>(0.110)              | -0.039<br>(0.046)                | 0.029<br>(0.079)                        | -0.038<br>(0.034)                                   |                                  |                                         |                                                     |
| Managers (FTE) squared                             | 0.0002**<br>(0.0001)               | 0.0001<br>(0.0001)              | 0.0001<br>(0.0002)              | 0.0001*<br>(0.0001)              | 0.0001<br>(0.0002)                      | 0.0001*<br>(0.0001)                                 |                                  |                                         |                                                     |
| Managers (FTE - basic definition)                  |                                    |                                 |                                 |                                  |                                         |                                                     | -0.036<br>(0.032)                | 0.033<br>(0.058)                        | -0.020<br>(0.028)                                   |
| Managers (FTE basic definition) squared            |                                    |                                 |                                 |                                  |                                         |                                                     | 0.0002***<br>(0.0001)            | 0.0001<br>(0.0001)                      | 0.0001<br>(0.0001)                                  |
| Senior doctors (FTE)                               | 0.022<br>(0.053)                   | 0.077<br>(0.067)                | 0.114<br>(0.088)                | 0.068*<br>(0.039)                | 0.266***<br>(0.096)                     | 0.001<br>(0.030)                                    | 0.092***<br>(0.019)              | 0.100***<br>(0.036)                     | 0.040**<br>(0.016)                                  |
| NHS staff survey consolidated management score (%) | 4.161***<br>(0.702)                | 5.278***<br>(0.944)             | 4.700***<br>(1.146)             | 4.586***<br>(0.525)              | 0.892<br>(0.748)                        | 1.496***<br>(0.433)                                 | 2.641***<br>(0.249)              | 0.447<br>(0.319)                        | 0.925***<br>(0.206)                                 |
| Beds (total number)                                | -0.009<br>(0.019)                  | -0.027<br>(0.021)               | -0.024<br>(0.025)               | -0.019<br>(0.012)                | -0.044<br>(0.031)                       | 0.003<br>(0.009)                                    | -0.004<br>(0.006)                | -0.012<br>(0.009)                       | -0.0002<br>(0.005)                                  |
| Total Operating Cost (£ million)                   | -0.024<br>(0.028)                  | -0.038<br>(0.038)               | -0.083<br>(0.054)               | -0.045**<br>(0.022)              | -0.172***<br>(0.060)                    | -0.002<br>(0.017)                                   | -0.060***<br>(0.011)             | -0.117***<br>(0.024)                    | -0.030***<br>(0.009)                                |
| Total inpatient admissions                         | 0.00004<br>(0.0001)                | -0.0001<br>(0.0001)             | -0.00003<br>(0.0001)            | -0.00002<br>(0.0001)             | -0.0002*<br>(0.0001)                    | -0.00005<br>(0.00005)                               | -0.00005<br>(0.00003)            | 0.0001<br>(0.0001)                      | -0.00003<br>(0.00003)                               |
| Female share of inpatient admissions (%)           | 0.349<br>(0.407)                   | -0.595<br>(0.597)               | 0.069<br>(0.787)                | -0.022<br>(0.350)                | 0.478<br>(1.084)                        | -0.080<br>(0.271)                                   | 0.485**<br>(0.197)               | 0.453*<br>(0.255)                       | -0.432***<br>(0.127)                                |
| Inpatient admissions age 0-14 (%)                  | 1.174<br>(2.053)                   | 1.554<br>(2.824)                | 2.279<br>(3.676)                | 2.211<br>(1.573)                 | -1.329<br>(1.723)                       | 0.039<br>(1.196)                                    | 1.235<br>(0.797)                 | 0.316<br>(0.802)                        | -0.458<br>(0.698)                                   |
| Inpatient admissions age 15-29 (%)                 | 0.771<br>(2.199)                   | 2.226<br>(3.039)                | -0.468<br>(3.979)               | 1.563<br>(1.701)                 | -0.548<br>(2.100)                       | -0.638<br>(1.292)                                   | 0.751<br>(0.849)                 | 1.114<br>(1.043)                        | -0.306<br>(0.745)                                   |
| Inpatient admissions age 30-44 (%)                 | 0.140<br>(2.177)                   | 1.261<br>(3.054)                | 3.918<br>(4.192)                | 2.166<br>(1.719)                 | 3.214<br>(2.274)                        | 0.526<br>(1.303)                                    | 0.616<br>(0.865)                 | 0.316<br>(1.004)                        | -0.142<br>(0.756)                                   |
| Inpatient admissions age 45-59 (%)                 | 1.029<br>(2.247)                   | 0.356<br>(3.036)                | -0.246<br>(3.963)               | 0.991<br>(1.705)                 | 0.219<br>(1.898)                        | -0.589<br>(1.289)                                   | 0.736<br>(0.873)                 | -0.096<br>(0.998)                       | -0.996<br>(0.766)                                   |
| Inpatient admissions age 60-74 (%)                 | 1.067<br>(2.149)                   | 3.353<br>(2.955)                | 3.193<br>(3.808)                | 3.059*<br>(1.647)                | 0.929<br>(1.968)                        | 0.251<br>(1.257)                                    | 1.865**<br>(0.833)               | -0.439<br>(1.015)                       | 0.055<br>(0.728)                                    |
| Inpatient admissions age 75-89 (%)                 | 1.263<br>(2.338)                   | -0.810<br>(3.135)               | 1.111<br>(4.237)                | 1.157<br>(1.778)                 | 0.818<br>(1.919)                        | -0.380<br>(1.345)                                   | 0.397<br>(0.890)                 | -0.152<br>(1.002)                       | -1.022<br>(0.785)                                   |
| Inpatient admissions age 90+ (%)                   | -5.198<br>(3.148)                  | 2.697<br>(4.281)                | -4.806<br>(6.313)               | -2.092<br>(2.537)                | 0.559<br>(3.147)                        | -2.316<br>(1.914)                                   | -0.668<br>(1.232)                | -0.153<br>(1.569)                       | -0.908<br>(1.090)                                   |
| Specialist status                                  | -21.395**<br>(10.210)              | -18.928<br>(12.714)             | -36.430**<br>(18.337)           | -25.113***<br>(7.765)            |                                         | -12.825**<br>(5.890)                                | -12.712***<br>(3.990)            |                                         | -8.031**<br>(3.528)                                 |
| Financial Year 2013/14                             |                                    |                                 |                                 |                                  |                                         |                                                     | -6.273***<br>(2.231)             |                                         |                                                     |
| Financial Year 2014/15                             |                                    |                                 |                                 |                                  |                                         |                                                     | -10.853***<br>(2.335)            |                                         |                                                     |
| Financial Year 2015/16                             |                                    |                                 |                                 |                                  |                                         |                                                     | -27.642***<br>(2.480)            |                                         |                                                     |
| Financial Year 2016/17                             |                                    |                                 |                                 |                                  |                                         |                                                     | -16.147***<br>(2.769)            |                                         |                                                     |
| Financial Year 2017/18                             |                                    |                                 |                                 | -3.487<br>(2.853)                |                                         |                                                     | -19.511***<br>(2.821)            |                                         |                                                     |
| Financial Year 2018/19                             |                                    |                                 |                                 | -3.221<br>(3.039)                |                                         |                                                     | -18.556***<br>(2.924)            |                                         |                                                     |
| Lagged Net financial position (£ million)          |                                    |                                 |                                 |                                  |                                         | 0.787**<br>(0.044)                                  |                                  |                                         | 0.810***<br>(0.030)                                 |
| Constant                                           | -350.882<br>(218.688)              | -437.247<br>(285.552)           | -438.735<br>(380.448)           | -456.112***<br>(163.298)         |                                         | -64.408<br>(125.566)                                | -264.318***<br>(82.508)          |                                         | 18.834<br>(72.491)                                  |
| Observations                                       | 151                                | 149                             | 133                             | 433                              | 433                                     | 432                                                 | 1,017                            | 1,017                                   | 865                                                 |
| R <sup>2</sup>                                     | 0.355                              | 0.410                           | 0.309                           | 0.321                            | 0.082                                   | 0.613                                               | 0.297                            | 0.060                                   | 0.578                                               |
| Adjusted R <sup>2</sup>                            | 0.278                              | 0.339                           | 0.213                           | 0.291                            | -0.496                                  | 0.597                                               | 0.281                            | -0.131                                  | 0.570                                               |
| F Statistic                                        | 4.604*** (df = 16; 134)            | 5.745*** (df = 16; 132)         | 3.237*** (df = 16; 116)         | 10.874*** (df = 18; 414)         | 1.578* (df = 15; 265)                   | 38.562*** (df = 17; 414)                            | 19.086*** (df = 22; 994)         | 3.577*** (df = 15; 845)                 | 68.295*** (df = 17; 847)                            |

Note:

\*p<0.1; \*\*p<0.05; \*\*\*p<0.01

Table 9: Net financial position (£ million) against Management Spend (£)

|                                                    | <i>Dependent variable:</i>         |                                 |                                 |                                  |                                         |                                                     |
|----------------------------------------------------|------------------------------------|---------------------------------|---------------------------------|----------------------------------|-----------------------------------------|-----------------------------------------------------|
|                                                    | Net financial position (£ million) |                                 |                                 |                                  |                                         |                                                     |
|                                                    | <i>cross-section</i><br>2016/17    | <i>cross-section</i><br>2017/18 | <i>cross-section</i><br>2018/19 | <i>pooled</i><br>2016/17-2018/19 | <i>fixed effects</i><br>2016/17-2018/19 | <i>lagged dependent variable</i><br>2016/17-2018/19 |
| (1)                                                | (2)                                | (3)                             | (4)                             | (5)                              | (6)                                     |                                                     |
| Management spend (£ million)                       | -2.854**<br>(1.102)                | 0.253<br>(1.437)                | -0.367<br>(2.097)               | -0.973<br>(0.856)                | 0.451<br>(1.301)                        | -1.037<br>(0.631)                                   |
| Management spend (£ million) squared               | 0.00000***<br>(0.00000)            | 0.00000<br>(0.00000)            | 0.00000<br>(0.00000)            | 0.00000**<br>(0.00000)           | -0.000<br>(0.00000)                     | 0.00000**<br>(0.00000)                              |
| Senior doctors (FTE)                               | 0.030<br>(0.050)                   | 0.091<br>(0.065)                | 0.125<br>(0.086)                | 0.079**<br>(0.038)               | 0.283***<br>(0.095)                     | 0.006<br>(0.029)                                    |
| NHS staff survey consolidated management score (%) | 4.106***<br>(0.678)                | 5.206***<br>(0.954)             | 4.644***<br>(1.154)             | 4.561***<br>(0.525)              | 0.919<br>(0.749)                        | 1.557***<br>(0.434)                                 |
| Beds (total number)                                | -0.0001<br>(0.018)                 | -0.023<br>(0.021)               | -0.019<br>(0.025)               | -0.013<br>(0.012)                | -0.047<br>(0.031)                       | 0.006<br>(0.009)                                    |
| Total Operating Cost (£ million)                   | -0.040<br>(0.027)                  | -0.052<br>(0.038)               | -0.096*<br>(0.054)              | -0.058***<br>(0.022)             | -0.157***<br>(0.058)                    | -0.007<br>(0.017)                                   |
| Total inpatient admissions                         | 0.00003<br>(0.0001)                | -0.0001<br>(0.0001)             | -0.00004<br>(0.0001)            | -0.00003<br>(0.0001)             | -0.00002*<br>(0.0001)                   | -0.00005<br>(0.00005)                               |
| Female share of inpatient admissions (%)           | 0.331<br>(0.482)                   | -0.718<br>(0.596)               | -0.056<br>(0.783)               | -0.115<br>(0.356)                | 0.542<br>(1.085)                        | -0.130<br>(0.270)                                   |
| Inpatient admissions age 0-14 (%)                  | 1.334<br>(1.986)                   | 1.050<br>(2.830)                | 1.561<br>(3.678)                | 1.778<br>(1.564)                 | -1.307<br>(1.726)                       | -0.196<br>(1.194)                                   |
| Inpatient admissions age 15-29 (%)                 | 0.748<br>(2.128)                   | 1.922<br>(3.046)                | -1.034<br>(4.016)               | 1.236<br>(1.697)                 | -0.475<br>(2.105)                       | -0.838<br>(1.294)                                   |
| Inpatient admissions age 30-44 (%)                 | 0.409<br>(2.104)                   | 0.762<br>(3.052)                | 3.202<br>(4.173)                | 1.750<br>(1.706)                 | 3.096<br>(2.278)                        | 0.304<br>(1.299)                                    |
| Inpatient admissions age 45-59 (%)                 | 1.126<br>(2.173)                   | -0.124<br>(3.043)               | -1.050<br>(3.984)               | 0.538<br>(1.698)                 | 0.173<br>(1.900)                        | -0.846<br>(1.288)                                   |
| Inpatient admissions age 60-74 (%)                 | 1.238<br>(2.080)                   | 2.897<br>(2.960)                | 2.605<br>(3.815)                | 2.666<br>(1.640)                 | 0.914<br>(1.975)                        | 0.038<br>(1.256)                                    |
| Inpatient admissions age 75-89 (%)                 | 1.342<br>(2.263)                   | -1.394<br>(3.141)               | 0.224<br>(4.229)                | 0.657<br>(1.767)                 | 1.048<br>(1.917)                        | -0.652<br>(1.342)                                   |
| Inpatient admissions age 90+ (%)                   | -4.713<br>(3.041)                  | 2.429<br>(4.273)                | -5.387<br>(6.334)               | -2.357<br>(2.521)                | 0.306<br>(3.147)                        | -2.544<br>(1.910)                                   |
| Specialist status                                  | -19.485*<br>(9.890)                | -18.651<br>(12.620)             | -37.588**<br>(18.144)           | -24.391***<br>(7.680)            |                                         | -12.665**<br>(5.852)                                |
| Financial Year 2017/18                             |                                    |                                 |                                 | -3.957<br>(2.876)                |                                         |                                                     |
| Financial Year 2018/19                             |                                    |                                 |                                 | -3.344<br>(3.068)                |                                         |                                                     |
| Lagged Net financial position (£ million)          |                                    |                                 |                                 |                                  |                                         | 0.784***<br>(0.045)                                 |
| Constant                                           | -355.567*<br>(211.524)             | -380.749<br>(287.399)           | -355.259<br>(381.573)           | -406.548**<br>(162.816)          |                                         | -40.934<br>(125.535)                                |
| Observations                                       | 151                                | 149                             | 133                             | 433                              | 433                                     | 432                                                 |
| R <sup>2</sup>                                     | 0.395                              | 0.413                           | 0.316                           | 0.328                            | 0.078                                   | 0.614                                               |
| Adjusted R <sup>2</sup>                            | 0.323                              | 0.342                           | 0.222                           | 0.299                            | -0.503                                  | 0.598                                               |
| F Statistic                                        | 5.474*** (df = 16; 134)            | 5.803*** (df = 16; 132)         | 3.354*** (df = 16; 116)         | 11.249*** (df = 18; 414)         | 1.490 (df = 15; 265)                    | 38.682*** (df = 17; 414)                            |

Note:

\*p<0.1; \*\*p<0.05; \*\*\*p<0.01

Table 10: A&E 4 hour wait target met (%) against Management (FTE)

|                                                    | Dependent variable:            |                          |                          |                           |                                  |                                              |                           |                                  |                                              |
|----------------------------------------------------|--------------------------------|--------------------------|--------------------------|---------------------------|----------------------------------|----------------------------------------------|---------------------------|----------------------------------|----------------------------------------------|
|                                                    | A&E 4 hour wait target met (%) |                          |                          |                           |                                  |                                              |                           |                                  |                                              |
|                                                    | cross-section<br>2016/17       | cross-section<br>2017/18 | cross-section<br>2018/19 | pooled<br>2016/17-2018/19 | fixed effects<br>2016/17-2018/19 | logged dependent variable<br>2016/17-2018/19 | pooled<br>2012/13-2018/19 | fixed effects<br>2012/13-2018/19 | logged dependent variable<br>2012/13-2018/19 |
| (1)                                                | (2)                            | (3)                      | (4)                      | (5)                       | (6)                              | (7)                                          | (8)                       | (9)                              |                                              |
| Managers (FTE)                                     | -0.026<br>(0.021)              | -0.040<br>(0.026)        | -0.028<br>(0.026)        | -0.029**<br>(0.013)       | 0.014<br>(0.018)                 | -0.003<br>(0.008)                            |                           |                                  |                                              |
| Managers (FTE) squared                             | 0.00003<br>(0.00003)           | 0.00004<br>(0.00004)     | 0.00002<br>(0.00004)     | 0.00002<br>(0.00002)      | -0.00005<br>(0.00004)            | 0.00000<br>(0.00001)                         |                           |                                  |                                              |
| Managers (FTE - basic definition)                  |                                |                          |                          |                           |                                  |                                              | -0.023**<br>(0.010)       | 0.003<br>(0.017)                 | -0.008<br>(0.009)                            |
| Managers (FTE basic definition) squared            |                                |                          |                          |                           |                                  |                                              | 0.00004*<br>(0.00002)     | -0.00003<br>(0.00003)            | 0.00001<br>(0.00002)                         |
| Senior doctors (FTE)                               | 0.026<br>(0.019)               | 0.015<br>(0.021)         | 0.011<br>(0.021)         | 0.018<br>(0.011)          | 0.017<br>(0.021)                 | 0.003<br>(0.007)                             | 0.021***<br>(0.006)       | 0.010<br>(0.011)                 | 0.007<br>(0.005)                             |
| NHS staff survey consolidated management score (%) | 0.549**<br>(0.252)             | 0.992***<br>(0.314)      | 0.941***<br>(0.269)      | 0.798***<br>(0.153)       | 0.369**<br>(0.175)               | 0.173*<br>(0.101)                            | 0.400**<br>(0.079)        | 0.081<br>(0.093)                 | 0.042<br>(0.061)                             |
| Beds (total number)                                | -0.011<br>(0.007)              | -0.008<br>(0.007)        | -0.009<br>(0.006)        | -0.009**<br>(0.004)       | -0.001<br>(0.007)                | -0.007***<br>(0.002)                         | -0.002<br>(0.002)         | -0.002<br>(0.003)                | -0.002<br>(0.001)                            |
| Total Operating Cost (£ million)                   | -0.007<br>(0.010)              | 0.0002<br>(0.013)        | 0.003<br>(0.013)         | -0.001<br>(0.007)         | -0.004<br>(0.013)                | 0.002<br>(0.004)                             | -0.005<br>(0.004)         | -0.021***<br>(0.007)             | -0.003<br>(0.003)                            |
| Total inpatient admissions                         | 0.00003<br>(0.00004)           | -0.00001<br>(0.00004)    | 0.00001<br>(0.00003)     | 0.00001<br>(0.00002)      | 0.00003<br>(0.00003)             | 0.00002**<br>(0.00001)                       | -0.00002**<br>(0.00001)   | 0.00004**<br>(0.00002)           | 0.00000<br>(0.00001)                         |
| Female share of inpatient admissions (%)           | 0.146<br>(0.203)               | 0.050<br>(0.207)         | 0.355*<br>(0.203)        | 0.174<br>(0.113)          | 0.273<br>(0.253)                 | 0.105<br>(0.072)                             | 0.284***<br>(0.076)       | 0.089<br>(0.085)                 | 0.149***<br>(0.042)                          |
| Inpatient admissions age 0-14 (%)                  | -0.00003<br>(0.750)            | 0.491<br>(0.959)         | -0.104<br>(0.885)        | 0.279<br>(0.469)          | 0.333<br>(0.401)                 | 0.200<br>(0.298)                             | 0.295<br>(0.260)          | -0.259<br>(0.238)                | 0.215<br>(0.217)                             |
| Inpatient admissions age 15-29 (%)                 | 0.369<br>(0.822)               | 0.514<br>(1.046)         | 0.091<br>(0.983)         | 0.467<br>(0.519)          | 0.264<br>(0.507)                 | 0.123<br>(0.330)                             | 0.389<br>(0.284)          | 0.278<br>(0.321)                 | 0.121<br>(0.237)                             |
| Inpatient admissions age 30-44 (%)                 | -0.796<br>(0.783)              | 0.159<br>(1.035)         | -0.889<br>(0.855)        | -0.327<br>(0.513)         | 0.594<br>(0.559)                 | -0.013<br>(0.326)                            | -0.192<br>(0.285)         | -0.191<br>(0.310)                | 0.027<br>(0.236)                             |
| Inpatient admissions age 45-59 (%)                 | 0.884<br>(0.869)               | 0.525<br>(1.026)         | -0.069<br>(0.965)        | 0.585<br>(0.517)          | 1.015**<br>(0.452)               | 0.318<br>(0.327)                             | 0.552*<br>(0.293)         | 0.265<br>(0.300)                 | 0.350<br>(0.244)                             |
| Inpatient admissions age 60-74 (%)                 | -0.767<br>(0.795)              | 0.922<br>(1.001)         | 0.567<br>(0.931)         | 0.313<br>(0.497)          | 0.115<br>(0.458)                 | 0.174<br>(0.317)                             | 0.372<br>(0.280)          | -0.064<br>(0.306)                | 0.263<br>(0.231)                             |
| Inpatient admissions age 75-89 (%)                 | 0.752<br>(0.904)               | -0.038<br>(1.156)        | -1.003<br>(1.118)        | 0.193<br>(0.572)          | 1.052**<br>(0.472)               | 0.095<br>(0.362)                             | 0.330<br>(0.313)          | 0.169<br>(0.313)                 | 0.083<br>(0.263)                             |
| Inpatient admissions age 90+ (%)                   | -1.516<br>(1.190)              | 1.205<br>(1.366)         | 2.092<br>(1.564)         | 0.359<br>(0.758)          | 0.769<br>(0.712)                 | 0.637<br>(0.481)                             | 0.080<br>(0.416)          | 0.381<br>(0.473)                 | 0.477<br>(0.349)                             |
| Specialist status                                  | 7.594*<br>(4.508)              | 8.089<br>(5.172)         | 7.767<br>(5.503)         | 7.683***<br>(2.826)       |                                  | 2.322<br>(1.808)                             | 6.794***<br>(1.602)       |                                  | 2.961**<br>(1.367)                           |
| Financial Year 2013/14                             |                                |                          |                          |                           |                                  |                                              | -1.082<br>(0.730)         |                                  |                                              |
| Financial Year 2014/15                             |                                |                          |                          |                           |                                  |                                              | -4.189***<br>(0.744)      |                                  |                                              |
| Financial Year 2015/16                             |                                |                          |                          |                           |                                  |                                              | -6.906***<br>(0.812)      |                                  |                                              |
| Financial Year 2016/17                             |                                |                          |                          |                           |                                  |                                              | -8.276***<br>(0.951)      |                                  |                                              |
| Financial Year 2017/18                             |                                |                          |                          | -0.901<br>(0.833)         |                                  |                                              | -9.284***<br>(0.966)      |                                  |                                              |
| Financial Year 2018/19                             |                                |                          |                          | -1.414<br>(0.871)         |                                  |                                              | -9.610***<br>(0.980)      |                                  |                                              |
| Lagged A&E 4 hour wait target met (%)              |                                |                          |                          |                           |                                  | 0.832***<br>(0.036)                          |                           |                                  | 0.777***<br>(0.028)                          |
| Constant                                           | 45.652<br>(79.755)             | -21.324<br>(95.991)      | 25.457<br>(91.173)       | 4.393<br>(48.339)         |                                  | -19.718<br>(30.777)                          | 27.251<br>(26.840)        |                                  | -10.488<br>(22.429)                          |
| Observations                                       | 125                            | 124                      | 122                      | 371                       | 371                              | 370                                          | 863                       | 863                              | 735                                          |
| R <sup>2</sup>                                     | 0.311                          | 0.323                    | 0.318                    | 0.288                     | 0.075                            | 0.714                                        | 0.416                     | 0.038                            | 0.657                                        |
| Adjusted R <sup>2</sup>                            | 0.209                          | 0.222                    | 0.214                    | 0.252                     | -0.495                           | 0.700                                        | 0.401                     | -0.156                           | 0.649                                        |
| F Statistic                                        | 3.049*** (df = 16; 108)        | 3.189*** (df = 16; 107)  | 3.059*** (df = 16; 105)  | 7.908*** (df = 18; 352)   | 1.237 (df = 15; 229)             | 51.580*** (df = 17; 352)                     | 27.237*** (df = 22; 840)  | 1.905** (df = 15; 717)           | 80.873*** (df = 17; 717)                     |

Note:

\*p<0.1; \*\*p<0.05; \*\*\*p<0.01

Table 11: log A&E 4 hour wait target met (%) against log Management (FTE)

|                                                        | <i>Dependent variable:</i>             |                                        |                                        |                                         |                                                |                                                            |                                         |                                                |                                                            |
|--------------------------------------------------------|----------------------------------------|----------------------------------------|----------------------------------------|-----------------------------------------|------------------------------------------------|------------------------------------------------------------|-----------------------------------------|------------------------------------------------|------------------------------------------------------------|
|                                                        | log A&E 4 hour wait target met (%)     |                                        |                                        |                                         |                                                |                                                            |                                         |                                                |                                                            |
|                                                        | <i>cross-section</i><br>2016/17<br>(1) | <i>cross-section</i><br>2018/18<br>(2) | <i>cross-section</i><br>2018/19<br>(3) | <i>pooled</i><br>2016/17-2018/19<br>(4) | <i>fixed effects</i><br>2016/17-2018/19<br>(5) | <i>lagged dependent variable</i><br>2016/17-2018/19<br>(6) | <i>pooled</i><br>2012/13-2018/19<br>(7) | <i>fixed effects</i><br>2012/13-2018/19<br>(8) | <i>lagged dependent variable</i><br>2012/13-2018/19<br>(9) |
| log Managers (FTE)                                     | -0.029*<br>(0.015)                     | -0.045**<br>(0.022)                    | -0.042*<br>(0.024)                     | -0.033***<br>(0.011)                    | 0.003<br>(0.013)                               | -0.001<br>(0.007)                                          |                                         |                                                |                                                            |
| log Managers (FTE - basic definition)                  |                                        |                                        |                                        |                                         |                                                |                                                            | -0.017***<br>(0.006)                    | -0.006<br>(0.013)                              | -0.007<br>(0.006)                                          |
| log Senior doctors (FTE)                               | -0.006<br>(0.040)                      | -0.013<br>(0.050)                      | -0.008<br>(0.050)                      | -0.007<br>(0.026)                       | 0.115<br>(0.071)                               | -0.016<br>(0.017)                                          | 0.023*<br>(0.014)                       | 0.099***<br>(0.037)                            | 0.0003<br>(0.012)                                          |
| log NHS staff survey consolidated management score (%) | 0.416**<br>(0.202)                     | 0.903***<br>(0.260)                    | 0.749***<br>(0.219)                    | 0.649***<br>(0.126)                     | 0.284**<br>(0.143)                             | 0.114<br>(0.083)                                           | 0.294***<br>(0.061)                     | 0.053<br>(0.071)                               | 0.041<br>(0.049)                                           |
| log Beds (total number)                                | 0.001<br>(0.036)                       | 0.0004<br>(0.039)                      | -0.019<br>(0.036)                      | -0.006<br>(0.021)                       | -0.021<br>(0.053)                              | -0.018<br>(0.013)                                          | 0.002<br>(0.012)                        | -0.044*<br>(0.025)                             | -0.002<br>(0.010)                                          |
| Total Operating Cost (£ million)                       | 0.00003<br>(0.0001)                    | 0.0001<br>(0.0001)                     | 0.0001<br>(0.0001)                     | 0.0001<br>(0.00004)                     | -0.0001<br>(0.0001)                            | 0.00001<br>(0.00003)                                       | 0.00003<br>(0.00003)                    | -0.0002***<br>(0.0001)                         | 0.00000<br>(0.00002)                                       |
| Total inpatient admissions                             | -0.00000<br>(0.00000)                  | -0.00000<br>(0.00000)                  | -0.00000<br>(0.00000)                  | -0.00000<br>(0.00000)                   | 0.00000<br>(0.00000)                           | 0.00000<br>(0.00000)                                       | -0.00000***<br>(0.00000)                | 0.00000*<br>(0.00000)                          | -0.00000<br>(0.00000)                                      |
| Female share of inpatient admissions (%)               | 0.0003<br>(0.002)                      | -0.00000<br>(0.002)                    | 0.004<br>(0.003)                       | 0.001<br>(0.001)                        | 0.002<br>(0.003)                               | 0.001<br>(0.001)                                           | 0.003***<br>(0.001)                     | 0.001<br>(0.001)                               | 0.002***<br>(0.001)                                        |
| Inpatient admissions age 0-14 (%)                      | -0.006<br>(0.009)                      | 0.003<br>(0.012)                       | -0.003<br>(0.011)                      | 0.0002<br>(0.006)                       | 0.004<br>(0.005)                               | 0.001<br>(0.004)                                           | 0.003<br>(0.003)                        | -0.003<br>(0.003)                              | 0.002<br>(0.003)                                           |
| Inpatient admissions age 15-29 (%)                     | -0.003<br>(0.010)                      | 0.002<br>(0.014)                       | -0.001<br>(0.013)                      | 0.001<br>(0.007)                        | 0.006<br>(0.007)                               | -0.001<br>(0.004)                                          | 0.004<br>(0.004)                        | 0.003<br>(0.004)                               | 0.001<br>(0.003)                                           |
| Inpatient admissions age 30-44 (%)                     | -0.013<br>(0.009)                      | 0.0004<br>(0.013)                      | -0.013<br>(0.013)                      | -0.006<br>(0.006)                       | 0.006<br>(0.007)                               | -0.001<br>(0.004)                                          | -0.003<br>(0.004)                       | -0.002<br>(0.004)                              | 0.0004<br>(0.003)                                          |
| Inpatient admissions age 45-59 (%)                     | 0.001<br>(0.010)                       | 0.002<br>(0.013)                       | -0.004<br>(0.012)                      | 0.002<br>(0.006)                        | 0.014**<br>(0.006)                             | 0.001<br>(0.004)                                           | 0.005<br>(0.004)                        | 0.003<br>(0.004)                               | 0.004<br>(0.003)                                           |
| Inpatient admissions age 60-74 (%)                     | -0.013<br>(0.010)                      | 0.011<br>(0.013)                       | 0.006<br>(0.012)                       | 0.002<br>(0.006)                        | 0.001<br>(0.006)                               | 0.001<br>(0.004)                                           | 0.005<br>(0.004)                        | -0.002<br>(0.004)                              | 0.003<br>(0.003)                                           |
| Inpatient admissions age 75-89 (%)                     | 0.001<br>(0.010)                       | -0.007<br>(0.015)                      | -0.017<br>(0.014)                      | -0.003<br>(0.007)                       | 0.012**<br>(0.006)                             | -0.002<br>(0.004)                                          | 0.003<br>(0.004)                        | 0.002<br>(0.004)                               | 0.0004<br>(0.003)                                          |
| Inpatient admissions age 90+ (%)                       | -0.024<br>(0.015)                      | 0.017<br>(0.017)                       | 0.026<br>(0.020)                       | 0.003<br>(0.010)                        | 0.010<br>(0.009)                               | 0.008<br>(0.006)                                           | 0.001<br>(0.005)                        | 0.004<br>(0.006)                               | 0.006<br>(0.004)                                           |
| Specialist status                                      | 0.111<br>(0.093)                       | 0.095<br>(0.106)                       | 0.046<br>(0.114)                       | 0.082<br>(0.058)                        |                                                | -0.003<br>(0.037)                                          | 0.087***<br>(0.032)                     |                                                | 0.033<br>(0.028)                                           |
| Financial Year 2013/14                                 |                                        |                                        |                                        |                                         |                                                |                                                            | -0.013<br>(0.009)                       |                                                |                                                            |
| Financial Year 2014/15                                 |                                        |                                        |                                        |                                         |                                                |                                                            | -0.047***<br>(0.009)                    |                                                |                                                            |
| Financial Year 2015/16                                 |                                        |                                        |                                        |                                         |                                                |                                                            | -0.078***<br>(0.010)                    |                                                |                                                            |
| Financial Year 2016/17                                 |                                        |                                        |                                        |                                         |                                                |                                                            | -0.094***<br>(0.012)                    |                                                |                                                            |
| Financial Year 2017/18                                 |                                        |                                        |                                        | -0.010<br>(0.010)                       |                                                |                                                            | -0.106***<br>(0.012)                    |                                                |                                                            |
| Financial Year 2018/19                                 |                                        |                                        |                                        | -0.012<br>(0.011)                       |                                                |                                                            | -0.110***<br>(0.012)                    |                                                |                                                            |
| Lagged log A&E 4 hour wait target met (%)              |                                        |                                        |                                        |                                         |                                                |                                                            |                                         |                                                | 0.770***<br>(0.029)                                        |
| Constant                                               | 3.482***<br>(1.319)                    | 0.705<br>(1.638)                       | 1.900<br>(1.523)                       | 1.944**<br>(0.818)                      |                                                |                                                            | 0.262<br>(0.524)                        | 2.857***<br>(0.434)                            | 0.581<br>(0.382)                                           |
| Observations                                           | 125                                    | 124                                    | 122                                    | 371                                     | 371                                            | 370                                                        | 863                                     | 863                                            | 735                                                        |
| R <sup>2</sup>                                         | 0.255                                  | 0.285                                  | 0.290                                  | 0.244                                   | 0.074                                          | 0.697                                                      | 0.376                                   | 0.039                                          | 0.624                                                      |
| Adjusted R <sup>2</sup>                                | 0.152                                  | 0.186                                  | 0.190                                  | 0.207                                   | -0.490                                         | 0.683                                                      | 0.360                                   | -0.153                                         | 0.616                                                      |
| F Statistic                                            | 2.481*** (df = 15; 109)                | 2.874*** (df = 15; 108)                | 2.888*** (df = 15; 106)                | 6.689*** (df = 17; 353)                 | 1.310 (df = 14; 230)                           | 50.804*** (df = 16; 353)                                   | 24.096*** (df = 21; 841)                | 2.096** (df = 14; 718)                         | 74.614*** (df = 16; 718)                                   |

Note:

\*p<0.1; \*\*p<0.05; \*\*\*p<0.01

Table 12: A&E 4 hour wait target met (%) against Management Spend (£)

|                                                    | <i>Dependent variable:</i>      |                                 |                                 |                                  |                                         |                                                     |
|----------------------------------------------------|---------------------------------|---------------------------------|---------------------------------|----------------------------------|-----------------------------------------|-----------------------------------------------------|
|                                                    | A&E 4 hour wait target met (%)  |                                 |                                 |                                  |                                         |                                                     |
|                                                    | <i>cross-section</i><br>2016/17 | <i>cross-section</i><br>2017/18 | <i>cross-section</i><br>2018/19 | <i>pooled</i><br>2016/17-2018/19 | <i>fixed effects</i><br>2016/17-2018/19 | <i>lagged dependent variable</i><br>2016/17-2018/19 |
| (1)                                                | (2)                             | (3)                             | (4)                             | (5)                              | (6)                                     |                                                     |
| Management spend (£ million)                       | -0.723*<br>(0.421)              | -0.914*<br>(0.499)              | -0.711<br>(0.505)               | -0.706***<br>(0.255)             | -0.194<br>(0.299)                       | -0.127<br>(0.160)                                   |
| Management spend (£ million) squared               | 0.0000<br>(0.000)               | 0.0000<br>(0.000)               | 0.000<br>(0.000)                | 0.000**<br>(0.000)               | 0.000<br>(0.000)                        | 0.000<br>(0.000)                                    |
| Senior doctors (FTE)                               | 0.025<br>(0.018)                | 0.015<br>(0.021)                | 0.010<br>(0.020)                | 0.017<br>(0.011)                 | 0.013<br>(0.021)                        | 0.002<br>(0.007)                                    |
| NHS staff survey consolidated management score (%) | 0.547**<br>(0.249)              | 1.017***<br>(0.320)             | 0.967***<br>(0.273)             | 0.806***<br>(0.154)              | 0.364**<br>(0.176)                      | 0.176*<br>(0.102)                                   |
| Beds (total number)                                | -0.011<br>(0.007)               | -0.008<br>(0.007)               | -0.009<br>(0.006)               | -0.009**<br>(0.004)              | -0.0004<br>(0.007)                      | -0.007***<br>(0.002)                                |
| Total Operating Cost (£ million)                   | -0.006<br>(0.010)               | 0.0003<br>(0.012)               | 0.003<br>(0.013)                | -0.001<br>(0.007)                | -0.010<br>(0.013)                       | 0.002<br>(0.004)                                    |
| Total inpatient admissions                         | 0.00003<br>(0.00004)            | -0.00000<br>(0.00004)           | 0.00002<br>(0.00003)            | 0.00001<br>(0.00002)             | 0.00004<br>(0.00003)                    | 0.00003**<br>(0.00001)                              |
| Female share of inpatient admissions (%)           | 0.131<br>(0.202)                | 0.082<br>(0.205)                | 0.368*<br>(0.203)               | 0.187*<br>(0.113)                | 0.272<br>(0.253)                        | 0.107<br>(0.071)                                    |
| Inpatient admissions age 0-14 (%)                  | -0.037<br>(0.744)               | 0.573<br>(0.962)                | -0.113<br>(0.888)               | 0.311<br>(0.468)                 | 0.348<br>(0.401)                        | 0.207<br>(0.298)                                    |
| Inpatient admissions age 15-29 (%)                 | 0.303<br>(0.815)                | 0.543<br>(1.049)                | -0.007<br>(0.994)               | 0.444<br>(0.520)                 | 0.389<br>(0.509)                        | 0.114<br>(0.330)                                    |
| Inpatient admissions age 30-44 (%)                 | -0.791<br>(0.776)               | 0.248<br>(1.039)                | -0.837<br>(1.017)               | -0.264<br>(0.512)                | 0.635<br>(0.558)                        | 0.001<br>(0.325)                                    |
| Inpatient admissions age 45-59 (%)                 | 0.824<br>(0.861)                | 0.628<br>(1.029)                | -0.093<br>(0.971)               | 0.610<br>(0.516)                 | 1.080**<br>(0.450)                      | 0.322<br>(0.327)                                    |
| Inpatient admissions age 60-74 (%)                 | -0.829<br>(0.792)               | 0.957<br>(1.010)                | 0.528<br>(0.937)                | 0.306<br>(0.499)                 | 0.048<br>(0.459)                        | 0.171<br>(0.318)                                    |
| Inpatient admissions age 75-89 (%)                 | 0.728<br>(0.895)                | 0.112<br>(1.155)                | -0.945<br>(1.117)               | 0.279<br>(0.569)                 | 0.974**<br>(0.469)                      | 0.114<br>(0.360)                                    |
| Inpatient admissions age 90+ (%)                   | -1.619<br>(1.182)               | 1.204<br>(1.375)                | 1.967<br>(1.582)                | 0.296<br>(0.762)                 | 0.865<br>(0.711)                        | 0.612<br>(0.483)                                    |
| Specialist status                                  | 7.188<br>(4.486)                | 8.902*<br>(5.221)               | 8.817<br>(5.550)                | 8.079***<br>(2.831)              |                                         | 2.390<br>(1.813)                                    |
| Financial Year 2017/18                             |                                 |                                 |                                 | -0.626<br>(0.846)                |                                         |                                                     |
| Financial Year 2018/19                             |                                 |                                 |                                 | -1.169<br>(0.884)                |                                         |                                                     |
| Lagged A&E 4 hour wait target met (%)              |                                 |                                 |                                 |                                  |                                         | 0.831***<br>(0.036)                                 |
| Constant                                           | 51.909<br>(79.169)              | -31.656<br>(96.801)             | 25.171<br>(91.707)              | 1.127<br>(48.390)                |                                         | -20.119<br>(30.806)                                 |
| Observations                                       | 125                             | 124                             | 122                             | 371                              | 371                                     | 370                                                 |
| R <sup>2</sup>                                     | 0.320                           | 0.320                           | 0.318                           | 0.288                            | 0.072                                   | 0.714                                               |
| Adjusted R <sup>2</sup>                            | 0.220                           | 0.219                           | 0.214                           | 0.252                            | -0.499                                  | 0.700                                               |
| F Statistic                                        | 3.181*** (df = 16; 108)         | 3.152*** (df = 16; 107)         | 3.057*** (df = 16; 105)         | 7.920*** (df = 18; 352)          | 1.192 (df = 15; 229)                    | 51.610*** (df = 17; 352)                            |

Note:

\*p<0.1; \*\*p<0.05; \*\*\*p<0.01

Table 13: log A&E 4 hour wait target met (%) against log Management Spend (£)

|                                                        | <i>Dependent variable:</i>         |                                 |                                 |                                  |                                         |                                                     |
|--------------------------------------------------------|------------------------------------|---------------------------------|---------------------------------|----------------------------------|-----------------------------------------|-----------------------------------------------------|
|                                                        | log A&E 4 hour wait target met (%) |                                 |                                 |                                  |                                         |                                                     |
|                                                        | <i>cross-section</i><br>2016/17    | <i>cross-section</i><br>2017/18 | <i>cross-section</i><br>2018/19 | <i>pooled</i><br>2016/17-2018/19 | <i>fixed effects</i><br>2016/17-2018/19 | <i>lagged dependent variable</i><br>2016/17-2018/19 |
| (1)                                                    | (2)                                | (3)                             | (4)                             | (5)                              | (6)                                     |                                                     |
| log Management spend (£ million)                       | -0.038**<br>(0.019)                | -0.042*<br>(0.025)              | -0.043*<br>(0.026)              | -0.035***<br>(0.012)             | -0.0003<br>(0.011)                      | -0.001<br>(0.008)                                   |
| log Senior doctors (FTE)                               | -0.005<br>(0.040)                  | -0.012<br>(0.051)               | -0.004<br>(0.051)               | -0.005<br>(0.026)                | 0.116<br>(0.071)                        | -0.016<br>(0.017)                                   |
| log NHS staff survey consolidated management score (%) | 0.424**<br>(0.201)                 | 0.884***<br>(0.262)             | 0.747***<br>(0.220)             | 0.645***<br>(0.126)              | 0.285**<br>(0.143)                      | 0.113<br>(0.083)                                    |
| log Beds (total number)                                | 0.009<br>(0.037)                   | -0.007<br>(0.038)               | -0.025<br>(0.036)               | -0.009<br>(0.020)                | -0.021<br>(0.053)                       | -0.018<br>(0.013)                                   |
| Total Operating Cost (£ million)                       | 0.00004<br>(0.0001)                | 0.0001<br>(0.0001)              | 0.0001<br>(0.0001)              | 0.0001<br>(0.00004)              | -0.0001<br>(0.0001)                     | 0.00001<br>(0.00003)                                |
| Total inpatient admissions                             | -0.00000<br>(0.00000)              | -0.00000<br>(0.00000)           | -0.000<br>(0.00000)             | -0.00000<br>(0.00000)            | 0.00000<br>(0.00000)                    | 0.00000<br>(0.00000)                                |
| Female share of inpatient admissions (%)               | 0.0001<br>(0.002)                  | 0.0003<br>(0.003)               | 0.004*<br>(0.003)               | 0.002<br>(0.001)                 | 0.002<br>(0.003)                        | 0.001<br>(0.001)                                    |
| Inpatient admissions age 0-14 (%)                      | -0.007<br>(0.009)                  | 0.004<br>(0.012)                | -0.003<br>(0.011)               | 0.001<br>(0.006)                 | 0.004<br>(0.005)                        | 0.001<br>(0.004)                                    |
| Inpatient admissions age 15-29 (%)                     | -0.004<br>(0.010)                  | 0.003<br>(0.014)                | -0.001<br>(0.013)               | 0.002<br>(0.007)                 | 0.006<br>(0.007)                        | -0.001<br>(0.004)                                   |
| Inpatient admissions age 30-44 (%)                     | -0.013<br>(0.009)                  | 0.001<br>(0.013)                | -0.012<br>(0.013)               | -0.005<br>(0.006)                | 0.006<br>(0.007)                        | -0.001<br>(0.004)                                   |
| Inpatient admissions age 45-59 (%)                     | 0.001<br>(0.010)                   | 0.003<br>(0.013)                | -0.004<br>(0.012)               | 0.003<br>(0.006)                 | 0.014**<br>(0.006)                      | 0.001<br>(0.004)                                    |
| Inpatient admissions age 60-74 (%)                     | -0.013<br>(0.010)                  | 0.012<br>(0.013)                | 0.006<br>(0.012)                | 0.003<br>(0.006)                 | 0.001<br>(0.006)                        | 0.001<br>(0.004)                                    |
| Inpatient admissions age 75-89 (%)                     | 0.0001<br>(0.010)                  | -0.006<br>(0.015)               | -0.016<br>(0.014)               | -0.002<br>(0.007)                | 0.012**<br>(0.006)                      | -0.002<br>(0.004)                                   |
| Inpatient admissions age 90+ (%)                       | -0.025*<br>(0.015)                 | 0.019<br>(0.017)                | 0.027<br>(0.020)                | 0.004<br>(0.010)                 | 0.010<br>(0.009)                        | 0.008<br>(0.006)                                    |
| Specialist status                                      | 0.120<br>(0.093)                   | 0.092<br>(0.106)                | 0.046<br>(0.114)                | 0.082<br>(0.058)                 |                                         | -0.003<br>(0.037)                                   |
| Financial Year 2017/18                                 |                                    |                                 |                                 | -0.007<br>(0.011)                |                                         |                                                     |
| Financial Year 2018/19                                 |                                    |                                 |                                 | -0.010<br>(0.011)                |                                         |                                                     |
| Lagged log A&E 4 hour wait target met (%)              |                                    |                                 |                                 |                                  |                                         | 0.861***<br>(0.037)                                 |
| Constant                                               | 3.398**<br>(1.312)                 | 0.585<br>(1.692)                | 1.749<br>(1.549)                | 1.806**<br>(0.827)               |                                         | 0.259<br>(0.528)                                    |
| Observations                                           | 125                                | 124                             | 122                             | 371                              | 371                                     | 370                                                 |
| R <sup>2</sup>                                         | 0.263                              | 0.278                           | 0.288                           | 0.242                            | 0.074                                   | 0.697                                               |
| Adjusted R <sup>2</sup>                                | 0.162                              | 0.178                           | 0.187                           | 0.206                            | -0.490                                  | 0.683                                               |
| F Statistic                                            | 2.594*** (df = 15; 109)            | 2.778*** (df = 15; 108)         | 2.857*** (df = 15; 106)         | 6.638*** (df = 17; 353)          | 1.307 (df = 14; 230)                    | 50.802*** (df = 16; 353)                            |

Note:

\*p<0.1; \*\*p<0.05; \*\*\*p<0.01



Table 14: Referral to treatment in 18 weeks (%) against Management (FTE)

|                                                    | Dependent variable:                   |                                 |                                 |                                         |                                         |                                                     |                                         |                                         |                                                     |
|----------------------------------------------------|---------------------------------------|---------------------------------|---------------------------------|-----------------------------------------|-----------------------------------------|-----------------------------------------------------|-----------------------------------------|-----------------------------------------|-----------------------------------------------------|
|                                                    | Referral to treatment in 18 weeks (%) |                                 |                                 |                                         |                                         |                                                     |                                         |                                         |                                                     |
|                                                    | cross-section<br>2016/17<br>(1)       | cross-section<br>2017/18<br>(2) | cross-section<br>2018/19<br>(3) | cross-section<br>2016/17-2018/19<br>(4) | fixed effects<br>2016/17-2018/19<br>(5) | lagged dependent variable<br>2016/17-2018/19<br>(6) | cross-section<br>2015/17-2018/19<br>(7) | fixed effects<br>2012/13-2018/19<br>(8) | lagged dependent variable<br>2012/13-2018/19<br>(9) |
| Managers (FTE)                                     | -0.024*<br>(0.013)                    | -0.026<br>(0.017)               | -0.028<br>(0.018)               | -0.024***<br>(0.009)                    | 0.030**<br>(0.015)                      | -0.013*<br>(0.007)                                  |                                         |                                         |                                                     |
| Managers (FTE) squared                             | 0.00004*<br>(0.00002)                 | 0.00003<br>(0.00003)            | 0.00004<br>(0.00003)            | 0.00003***<br>(0.00001)                 | -0.00004<br>(0.00003)                   | 0.00002<br>(0.00001)                                |                                         |                                         |                                                     |
| Managers (FTE - basic definition)                  |                                       |                                 |                                 |                                         |                                         |                                                     | -0.016**<br>(0.006)                     | 0.027**<br>(0.012)                      | -0.011*<br>(0.006)                                  |
| Managers (FTE basic definition) squared            |                                       |                                 |                                 |                                         |                                         |                                                     | 0.00004***<br>(0.00001)                 | -0.00003<br>(0.00002)                   | 0.00003**<br>(0.00001)                              |
| Senior doctors (FTE)                               | -0.018<br>(0.013)                     | -0.025*<br>(0.014)              | -0.033**<br>(0.014)             | -0.023***<br>(0.008)                    | -0.009<br>(0.018)                       | -0.010*<br>(0.006)                                  | -0.007*<br>(0.004)                      | 0.005<br>(0.008)                        | -0.004<br>(0.003)                                   |
| NHS staff survey consolidated management score (%) | 0.542***<br>(0.159)                   | 1.001***<br>(0.197)             | 0.559***<br>(0.181)             | 0.641***<br>(0.100)                     | 0.101<br>(0.139)                        | 0.180**<br>(0.079)                                  | 0.409***<br>(0.050)                     | -0.003<br>(0.067)                       | 0.071*<br>(0.042)                                   |
| Beds (total number)                                | 0.007*<br>(0.004)                     | 0.008*<br>(0.004)               | 0.002<br>(0.004)                | 0.005**<br>(0.002)                      | 0.004<br>(0.006)                        | 0.001<br>(0.002)                                    | 0.003***<br>(0.001)                     | -0.002<br>(0.002)                       | 0.002**<br>(0.001)                                  |
| Total Operating Cost (£ million)                   | 0.005<br>(0.007)                      | 0.013<br>(0.008)                | 0.014<br>(0.009)                | 0.009**<br>(0.004)                      | 0.004<br>(0.011)                        | 0.005<br>(0.003)                                    | 0.0003<br>(0.002)                       | -0.009*<br>(0.005)                      | 0.0001<br>(0.002)                                   |
| Total inpatient admissions                         | -0.00002<br>(0.00002)                 | -0.00004*<br>(0.00002)          | 0.00000<br>(0.00002)            | -0.00001<br>(0.00001)                   | 0.00001<br>(0.00003)                    | -0.00000<br>(0.00001)                               | -0.00001<br>(0.00001)                   | 0.00001<br>(0.00001)                    | -0.00001<br>(0.00001)                               |
| Female share of inpatient admissions (%)           | -0.054<br>(0.116)                     | -0.032<br>(0.126)               | -0.062<br>(0.069)               | -0.038<br>(0.124)                       | -0.119<br>(0.203)                       | -0.075<br>(0.052)                                   | 0.101***<br>(0.039)                     | 0.073<br>(0.053)                        | 0.122***<br>(0.027)                                 |
| Inpatient admissions age 0-14 (%)                  | 0.106<br>(0.466)                      | 0.913<br>(0.585)                | -0.244<br>(0.581)               | 0.244<br>(0.298)                        | -0.654**<br>(0.322)                     | 0.204<br>(0.225)                                    | 0.054<br>(0.160)                        | -0.280*<br>(0.167)                      | 0.213<br>(0.145)                                    |
| Inpatient admissions age 15-29 (%)                 | -0.098<br>(0.497)                     | 0.444<br>(0.628)                | -1.313**<br>(0.631)             | -0.310<br>(0.322)                       | -0.351<br>(0.396)                       | -0.034<br>(0.242)                                   | -0.137<br>(0.171)                       | 0.052<br>(0.217)                        | -0.016<br>(0.154)                                   |
| Inpatient admissions age 30-44 (%)                 | 0.343<br>(0.491)                      | 1.097*<br>(0.630)               | 0.449<br>(0.661)                | 0.596*<br>(0.325)                       | 0.324<br>(0.421)                        | 0.394<br>(0.244)                                    | 0.032<br>(0.174)                        | -0.389*<br>(0.209)                      | 0.232<br>(0.157)                                    |
| Inpatient admissions age 45-59 (%)                 | 0.015<br>(0.512)                      | 0.702<br>(0.634)                | -0.741<br>(0.629)               | -0.002<br>(0.324)                       | -0.208<br>(0.343)                       | 0.085<br>(0.243)                                    | 0.019<br>(0.176)                        | -0.425**<br>(0.210)                     | 0.163<br>(0.159)                                    |
| Inpatient admissions age 60-74 (%)                 | -0.019<br>(0.487)                     | 0.873<br>(0.608)                | -0.300<br>(0.601)               | 0.188<br>(0.312)                        | 0.084<br>(0.367)                        | 0.241<br>(0.236)                                    | 0.060<br>(0.168)                        | -0.131<br>(0.212)                       | 0.237<br>(0.151)                                    |
| Inpatient admissions age 75-89 (%)                 | 0.300<br>(0.528)                      | 0.778<br>(0.647)                | -0.156<br>(0.671)               | 0.275<br>(0.337)                        | 0.190<br>(0.363)                        | 0.083<br>(0.253)                                    | -0.002<br>(0.179)                       | -0.267<br>(0.210)                       | 0.152<br>(0.162)                                    |
| Inpatient admissions age 90+ (%)                   | -0.827<br>(0.715)                     | 0.105<br>(0.879)                | -2.670***<br>(0.995)            | -1.047**<br>(0.481)                     | -0.685<br>(0.603)                       | -0.160<br>(0.361)                                   | -0.476*<br>(0.246)                      | -0.784**<br>(0.329)                     | -0.117<br>(0.224)                                   |
| Specialist status                                  | 1.857<br>(2.322)                      | -1.963<br>(2.620)               | -2.451<br>(2.889)               | -0.700<br>(1.476)                       |                                         | -0.872<br>(1.099)                                   | -1.686**<br>(0.799)                     |                                         | -0.516<br>(0.727)                                   |
| Financial Year 2013/14                             |                                       |                                 |                                 |                                         |                                         |                                                     | -0.615<br>(0.446)                       |                                         |                                                     |
| Financial Year 2014/15                             |                                       |                                 |                                 |                                         |                                         |                                                     | -1.333***<br>(0.469)                    |                                         |                                                     |
| Financial Year 2015/16                             |                                       |                                 |                                 |                                         |                                         |                                                     | -3.667***<br>(0.498)                    |                                         |                                                     |
| Financial Year 2016/17                             |                                       |                                 |                                 |                                         |                                         |                                                     | -4.106***<br>(0.551)                    |                                         |                                                     |
| Financial Year 2017/18                             |                                       |                                 |                                 | -2.869***<br>(0.545)                    |                                         |                                                     | -7.076***<br>(0.563)                    |                                         |                                                     |
| Financial Year 2018/19                             |                                       |                                 |                                 | -3.203***<br>(0.576)                    |                                         |                                                     | -7.283***<br>(0.582)                    |                                         |                                                     |
| Lagged Referral to treatment in 18 weeks (%)       |                                       |                                 |                                 |                                         |                                         | 0.752**<br>(0.040)                                  |                                         |                                         | 0.735***<br>(0.029)                                 |
| Constant                                           | 52.583<br>(49.755)                    | -50.508<br>(58.995)             | 101.660*<br>(60.006)            | 40.408<br>(30.930)                      |                                         | -0.673<br>(23.564)                                  | 66.336***<br>(16.602)                   |                                         | -2.738<br>(15.070)                                  |
| Observations                                       | 148                                   | 143                             | 131                             | 422                                     | 422                                     | 410                                                 | 986                                     | 986                                     | 816                                                 |
| R <sup>2</sup>                                     | 0.207                                 | 0.332                           | 0.324                           | 0.313                                   | 0.066                                   | 0.609                                               | 0.408                                   | 0.032                                   | 0.594                                               |
| Adjusted R <sup>2</sup>                            | 0.111                                 | 0.248                           | 0.229                           | 0.282                                   | -0.548                                  | 0.592                                               | 0.395                                   | -0.171                                  | 0.586                                               |
| F Statistic                                        | 2.144*** (df = 16; 131)               | 3.920*** (df = 16; 126)         | 3.409*** (df = 16; 114)         | 10.203*** (df = 18; 403)                | 1.199 (df = 15; 254)                    | 35.871*** (df = 17; 392)                            | 30.196*** (df = 22; 963)                | 1.800** (df = 15; 814)                  | 68.777*** (df = 17; 798)                            |

Note:

\*p<0.1; \*\*p<0.05; \*\*\*p<0.01

Table 15: log Referral to treatment in 18 weeks (%) against log Management (FTE)

|                                                        | <i>Dependent variable:</i>                |                                        |                                        |                                         |                                                |                                                            |                                         |                                                |                                                            |
|--------------------------------------------------------|-------------------------------------------|----------------------------------------|----------------------------------------|-----------------------------------------|------------------------------------------------|------------------------------------------------------------|-----------------------------------------|------------------------------------------------|------------------------------------------------------------|
|                                                        | log Referral to treatment in 18 weeks (%) |                                        |                                        |                                         |                                                |                                                            |                                         |                                                |                                                            |
|                                                        | <i>cross-section</i><br>2016/17<br>(1)    | <i>cross-section</i><br>2017/18<br>(2) | <i>cross-section</i><br>2018/19<br>(3) | <i>pooled</i><br>2016/17-2018/19<br>(4) | <i>fixed effects</i><br>2016/17-2018/19<br>(5) | <i>lagged dependent variable</i><br>2016/17-2018/19<br>(6) | <i>pooled</i><br>2012/13-2018/19<br>(7) | <i>fixed effects</i><br>2012/13-2018/19<br>(8) | <i>lagged dependent variable</i><br>2012/13-2018/19<br>(9) |
| log Managers (FTE)                                     | -0.003<br>(0.010)                         | -0.016<br>(0.014)                      | -0.002<br>(0.015)                      | -0.007<br>(0.007)                       | 0.019*<br>(0.010)                              | -0.006<br>(0.005)                                          |                                         |                                                |                                                            |
| log Managers (FTE - basic definition)                  |                                           |                                        |                                        |                                         |                                                |                                                            | -0.004<br>(0.004)                       | 0.014<br>(0.008)                               | -0.003<br>(0.003)                                          |
| log Senior doctors (FTE)                               | -0.031<br>(0.023)                         | -0.043<br>(0.030)                      | -0.069**<br>(0.030)                    | -0.044***<br>(0.016)                    | -0.057<br>(0.055)                              | -0.021*<br>(0.012)                                         | -0.016**<br>(0.008)                     | 0.029<br>(0.024)                               | -0.013*<br>(0.007)                                         |
| log NHS staff survey consolidated management score (%) | 0.440***<br>(0.121)                       | 0.793***<br>(0.152)                    | 0.393***<br>(0.135)                    | 0.502***<br>(0.076)                     | 0.086<br>(0.107)                               | 0.143**<br>(0.061)                                         | 0.281***<br>(0.036)                     | -0.012<br>(0.048)                              | 0.049<br>(0.031)                                           |
| log Beds (total number)                                | 0.002<br>(0.015)                          | 0.004<br>(0.017)                       | 0.007<br>(0.016)                       | 0.004<br>(0.009)                        | 0.071*<br>(0.038)                              | 0.0003<br>(0.007)                                          | 0.001<br>(0.005)                        | -0.001<br>(0.017)                              | 0.002<br>(0.004)                                           |
| Total Operating Cost (£ million)                       | 0.00001<br>(0.00004)                      | 0.0001<br>(0.0001)                     | 0.00002<br>(0.00002)                   | 0.00003<br>(0.00003)                    | 0.00004<br>(0.00004)                           | 0.00001<br>(0.00002)                                       | -0.00000<br>(0.00002)                   | -0.0001*<br>(0.00004)                          | 0.00000<br>(0.00001)                                       |
| Total inpatient admissions                             | 0.00000<br>(0.00000)                      | -0.00000<br>(0.00000)                  | 0.00000<br>(0.00000)                   | 0.00000<br>(0.00000)                    | 0.00000<br>(0.00000)                           | 0.00000<br>(0.00000)                                       | 0.00000<br>(0.00000)                    | 0.00000<br>(0.00000)                           | 0.00000<br>(0.00000)                                       |
| Female share of inpatient admissions (%)               | -0.0003<br>(0.001)                        | 0.0001<br>(0.001)                      | -0.001<br>(0.001)                      | -0.0002<br>(0.001)                      | -0.001<br>(0.002)                              | -0.001<br>(0.001)                                          | 0.001***<br>(0.0005)                    | 0.001<br>(0.001)                               | 0.001***<br>(0.0003)                                       |
| Inpatient admissions age 0-14 (%)                      | 0.003<br>(0.005)                          | 0.009<br>(0.007)                       | -0.003<br>(0.003)                      | 0.003<br>(0.003)                        | -0.007*<br>(0.004)                             | 0.003<br>(0.003)                                           | 0.001<br>(0.002)                        | -0.003*<br>(0.002)                             | 0.003<br>(0.002)                                           |
| Inpatient admissions age 15-29 (%)                     | 0.0004<br>(0.006)                         | 0.002<br>(0.008)                       | -0.017**<br>(0.007)                    | -0.004<br>(0.004)                       | -0.005<br>(0.005)                              | -0.0004<br>(0.003)                                         | -0.001<br>(0.002)                       | 0.001<br>(0.003)                               | -0.0001<br>(0.002)                                         |
| Inpatient admissions age 30-44 (%)                     | 0.004<br>(0.006)                          | 0.010<br>(0.007)                       | 0.006<br>(0.008)                       | 0.007*<br>(0.004)                       | 0.005<br>(0.005)                               | 0.005*<br>(0.003)                                          | 0.001<br>(0.002)                        | -0.004*<br>(0.002)                             | 0.003<br>(0.002)                                           |
| Inpatient admissions age 45-59 (%)                     | 0.003<br>(0.006)                          | 0.007<br>(0.004)                       | -0.008<br>(0.007)                      | 0.001<br>(0.004)                        | -0.002<br>(0.004)                              | 0.002<br>(0.003)                                           | 0.001<br>(0.002)                        | -0.005**<br>(0.002)                            | 0.002<br>(0.002)                                           |
| Inpatient admissions age 60-74 (%)                     | 0.0003<br>(0.006)                         | 0.007<br>(0.007)                       | -0.004<br>(0.007)                      | 0.002<br>(0.004)                        | 0.001<br>(0.004)                               | 0.003<br>(0.003)                                           | 0.001<br>(0.002)                        | -0.002<br>(0.002)                              | 0.003<br>(0.002)                                           |
| Inpatient admissions age 75-89 (%)                     | 0.005<br>(0.006)                          | 0.007<br>(0.008)                       | -0.002<br>(0.008)                      | 0.004<br>(0.004)                        | 0.002<br>(0.004)                               | 0.001<br>(0.003)                                           | 0.0005<br>(0.002)                       | -0.003<br>(0.002)                              | 0.002<br>(0.002)                                           |
| Inpatient admissions age 90+ (%)                       | -0.009<br>(0.008)                         | -0.002<br>(0.010)                      | -0.032***<br>(0.012)                   | -0.013**<br>(0.006)                     | -0.008<br>(0.007)                              | -0.002<br>(0.004)                                          | -0.006**<br>(0.003)                     | -0.010***<br>(0.004)                           | -0.002<br>(0.003)                                          |
| Specialist status                                      | 0.007<br>(0.033)                          | -0.042<br>(0.039)                      | -0.043<br>(0.042)                      | -0.023<br>(0.021)                       |                                                | -0.018<br>(0.016)                                          | -0.028**<br>(0.011)                     |                                                | -0.011<br>(0.010)                                          |
| Financial Year 2013/14                                 |                                           |                                        |                                        |                                         |                                                |                                                            | -0.007<br>(0.005)                       |                                                |                                                            |
| Financial Year 2014/15                                 |                                           |                                        |                                        |                                         |                                                |                                                            | -0.016***<br>(0.005)                    |                                                |                                                            |
| Financial Year 2015/16                                 |                                           |                                        |                                        |                                         |                                                |                                                            | -0.042***<br>(0.006)                    |                                                |                                                            |
| Financial Year 2016/17                                 |                                           |                                        |                                        |                                         |                                                |                                                            | -0.047***<br>(0.006)                    |                                                |                                                            |
| Financial Year 2017/18                                 |                                           |                                        |                                        | -0.035***<br>(0.006)                    |                                                |                                                            | -0.081***<br>(0.006)                    |                                                |                                                            |
| Financial Year 2018/19                                 |                                           |                                        |                                        | -0.041***<br>(0.007)                    |                                                |                                                            | -0.086***<br>(0.007)                    |                                                |                                                            |
| Lagged log Referral to treatment in 18 weeks (%)       |                                           |                                        |                                        |                                         |                                                | 0.751***<br>(0.041)                                        |                                         |                                                | 0.744***<br>(0.029)                                        |
| Constant                                               | 2.601***<br>(0.794)                       | 0.734<br>(0.947)                       | 3.690***<br>(0.912)                    | 2.447***<br>(0.493)                     |                                                | 0.468<br>(0.392)                                           | 3.391***<br>(0.250)                     |                                                | 0.717***<br>(0.249)                                        |
| Observations                                           | 148                                       | 143                                    | 131                                    | 422                                     | 422                                            | 410                                                        | 986                                     | 986                                            | 816                                                        |
| R <sup>2</sup>                                         | 0.178                                     | 0.321                                  | 0.316                                  | 0.300                                   | 0.070                                          | 0.591                                                      | 0.391                                   | 0.029                                          | 0.582                                                      |
| Adjusted R <sup>2</sup>                                | 0.085                                     | 0.240                                  | 0.227                                  | 0.270                                   | -0.535                                         | 0.575                                                      | 0.377                                   | -0.174                                         | 0.573                                                      |
| F Statistic                                            | 1.910** (df = 15; 132)                    | 3.996*** (df = 15; 127)                | 3.543*** (df = 15; 115)                | 10.167*** (df = 17; 404)                | 1.378 (df = 14; 255)                           | 35.527*** (df = 16; 393)                                   | 29.440*** (df = 21; 964)                | 1.738** (df = 14; 815)                         | 69.474*** (df = 16; 799)                                   |

Note:

\*p<0.1; \*\*p<0.05; \*\*\*p<0.01

Table 16: Referral to treatment in 18 weeks (%) against Management Spend (£)

|                                                    | <i>Dependent variable:</i>            |                                  |                                  |                                   |                                          |                                                      |
|----------------------------------------------------|---------------------------------------|----------------------------------|----------------------------------|-----------------------------------|------------------------------------------|------------------------------------------------------|
|                                                    | Referral to treatment in 18 weeks (%) |                                  |                                  |                                   |                                          |                                                      |
|                                                    | <i>cross-section<br/>2016/17</i>      | <i>cross-section<br/>2017/18</i> | <i>cross-section<br/>2018/19</i> | <i>pooled<br/>2016/17-2018/19</i> | <i>fixed effects<br/>2016/17-2018/19</i> | <i>lagged dependent variable<br/>2016/17-2018/19</i> |
| (1)                                                | (2)                                   | (3)                              | (4)                              | (5)                               | (6)                                      |                                                      |
| Management spend (£ million)                       | -0.392<br>(0.261)                     | -0.169<br>(0.299)                | -0.187<br>(0.335)                | -0.197<br>(0.165)                 | 0.499**<br>(0.240)                       | -0.179<br>(0.120)                                    |
| Management spend (£ million) squared               | 0.000<br>(0.000)                      | 0.000<br>(0.000)                 | 0.000<br>(0.000)                 | 0.000<br>(0.000)                  | -0.000<br>(0.000)                        | 0.000<br>(0.000)                                     |
| Senior doctors (FTE)                               | -0.015<br>(0.013)                     | -0.021<br>(0.014)                | -0.026*<br>(0.014)               | -0.019**<br>(0.008)               | -0.007<br>(0.018)                        | -0.009<br>(0.006)                                    |
| NHS staff survey consolidated management score (%) | 0.554***<br>(0.159)                   | 0.987***<br>(0.202)              | 0.516***<br>(0.185)              | 0.630***<br>(0.101)               | 0.118<br>(0.139)                         | 0.178**<br>(0.080)                                   |
| Beds (total number)                                | 0.007*<br>(0.004)                     | 0.008*<br>(0.004)                | 0.002<br>(0.004)                 | 0.005**<br>(0.002)                | 0.004<br>(0.006)                         | 0.001<br>(0.002)                                     |
| Total Operating Cost (£ million)                   | 0.003<br>(0.007)                      | 0.010<br>(0.009)                 | 0.009<br>(0.009)                 | 0.007<br>(0.005)                  | 0.005<br>(0.011)                         | 0.004<br>(0.003)                                     |
| Total inpatient admissions                         | -0.00002<br>(0.00002)                 | -0.00004*<br>(0.00002)           | -0.00000<br>(0.00002)            | -0.00002<br>(0.00001)             | 0.00001<br>(0.00003)                     | -0.00000<br>(0.00001)                                |
| Female share of inpatient admissions (%)           | -0.053<br>(0.117)                     | -0.027<br>(0.127)                | -0.067<br>(0.126)                | -0.035<br>(0.069)                 | -0.111<br>(0.202)                        | -0.072<br>(0.052)                                    |
| Inpatient admissions age 0-14 (%)                  | 0.117<br>(0.468)                      | 0.873<br>(0.591)                 | -0.251<br>(0.589)                | 0.239<br>(0.300)                  | -0.644**<br>(0.321)                      | 0.211<br>(0.225)                                     |
| Inpatient admissions age 15-29 (%)                 | -0.071<br>(0.499)                     | 0.443<br>(0.636)                 | -1.267*<br>(0.645)               | -0.281<br>(0.325)                 | -0.370<br>(0.395)                        | -0.021<br>(0.243)                                    |
| Inpatient admissions age 30-44 (%)                 | 0.340<br>(0.492)                      | 1.042<br>(0.636)                 | 0.437<br>(0.667)                 | 0.578*<br>(0.326)                 | 0.312<br>(0.420)                         | 0.399<br>(0.243)                                     |
| Inpatient admissions age 45-59 (%)                 | 0.040<br>(0.514)                      | 0.689<br>(0.642)                 | -0.724<br>(0.640)                | 0.013<br>(0.327)                  | -0.173<br>(0.354)                        | 0.097<br>(0.244)                                     |
| Inpatient admissions age 60-74 (%)                 | -0.010<br>(0.490)                     | 0.821<br>(0.615)                 | -0.309<br>(0.610)                | 0.175<br>(0.314)                  | 0.083<br>(0.366)                         | 0.242<br>(0.236)                                     |
| Inpatient admissions age 75-89 (%)                 | 0.306<br>(0.530)                      | 0.764<br>(0.655)                 | -0.143<br>(0.678)                | 0.289<br>(0.339)                  | 0.210<br>(0.361)                         | 0.101<br>(0.252)                                     |
| Inpatient admissions age 90+ (%)                   | -0.751<br>(0.718)                     | 0.166<br>(0.887)                 | -2.629**<br>(1.013)              | -0.989**<br>(0.484)               | -0.708<br>(0.601)                        | -0.130<br>(0.361)                                    |
| Specialist status                                  | 2.017<br>(2.331)                      | -1.486<br>(2.633)                | -2.198<br>(2.907)                | -0.360<br>(1.479)                 |                                          | -0.680<br>(1.096)                                    |
| Financial Year 2017/18                             |                                       |                                  |                                  | -2.958***<br>(0.557)              |                                          |                                                      |
| Financial Year 2018/19                             |                                       |                                  |                                  | -3.295***<br>(0.589)              |                                          |                                                      |
| Lagged Referral to treatment in 18 weeks (%)       |                                       |                                  |                                  |                                   |                                          | 0.758***<br>(0.040)                                  |
| Constant                                           | 50.214<br>(49.977)                    | -48.348<br>(59.951)              | 102.706*<br>(61.000)             | 39.723<br>(31.188)                |                                          | -2.363<br>(23.614)                                   |
| Observations                                       | 148                                   | 143                              | 131                              | 422                               | 422                                      | 410                                                  |
| R <sup>2</sup>                                     | 0.201                                 | 0.320                            | 0.311                            | 0.303                             | 0.070                                    | 0.607                                                |
| Adjusted R <sup>2</sup>                            | 0.103                                 | 0.233                            | 0.214                            | 0.272                             | -0.542                                   | 0.590                                                |
| F Statistic                                        | 2.055** (df = 16; 131)                | 3.703*** (df = 16; 126)          | 3.214*** (df = 16; 114)          | 9.749*** (df = 18; 403)           | 1.273 (df = 15; 254)                     | 35.621*** (df = 17; 392)                             |

Note:

\*p<0.1; \*\*p<0.05; \*\*\*p<0.01

Table 17: log Referral to treatment in 18 weeks (%) against log Management Spend (£)

|                                                        | <i>Dependent variable:</i>                |                                 |                                 |                                  |                                         |                                                     |
|--------------------------------------------------------|-------------------------------------------|---------------------------------|---------------------------------|----------------------------------|-----------------------------------------|-----------------------------------------------------|
|                                                        | log Referral to treatment in 18 weeks (%) |                                 |                                 |                                  |                                         |                                                     |
|                                                        | <i>cross-section</i><br>2016/17           | <i>cross-section</i><br>2017/18 | <i>cross-section</i><br>2018/19 | <i>pooled</i><br>2016/17-2018/19 | <i>fixed effects</i><br>2016/17-2018/19 | <i>lagged dependent variable</i><br>2016/17-2018/19 |
| (1)                                                    | (2)                                       | (3)                             | (4)                             | (5)                              | (6)                                     |                                                     |
| log Management spend (£ million)                       | -0.003<br>(0.012)                         | -0.006<br>(0.015)               | 0.013<br>(0.016)                | -0.0002<br>(0.008)               | 0.019**<br>(0.009)                      | -0.005<br>(0.006)                                   |
| log Senior doctors (FTE)                               | -0.031<br>(0.023)                         | -0.049<br>(0.031)               | -0.079**<br>(0.030)             | -0.047***<br>(0.016)             | -0.057<br>(0.055)                       | -0.021*<br>(0.012)                                  |
| log NHS staff survey consolidated management score (%) | 0.440***<br>(0.121)                       | 0.774***<br>(0.154)             | 0.359***<br>(0.135)             | 0.489***<br>(0.076)              | 0.093<br>(0.106)                        | 0.142**<br>(0.061)                                  |
| log Beds (total number)                                | 0.003<br>(0.016)                          | 0.003<br>(0.017)                | 0.007<br>(0.016)                | 0.003<br>(0.009)                 | 0.075*<br>(0.038)                       | -0.001<br>(0.007)                                   |
| Total Operating Cost (£ million)                       | 0.00001<br>(0.00004)                      | 0.0001<br>(0.0001)              | 0.00002<br>(0.0001)             | 0.00003<br>(0.00003)             | 0.00004<br>(0.0001)                     | 0.00001<br>(0.00002)                                |
| Total inpatient admissions                             | 0.00000<br>(0.00000)                      | -0.00000<br>(0.00000)           | 0.00000<br>(0.00000)            | 0.00000<br>(0.00000)             | 0.00000<br>(0.00000)                    | 0.00000<br>(0.00000)                                |
| Female share of inpatient admissions (%)               | -0.0003<br>(0.001)                        | 0.0001<br>(0.001)               | -0.001<br>(0.001)               | -0.0002<br>(0.001)               | -0.001<br>(0.002)                       | -0.001<br>(0.001)                                   |
| Inpatient admissions age 0-14 (%)                      | 0.003<br>(0.005)                          | 0.008<br>(0.007)                | -0.003<br>(0.007)               | 0.004<br>(0.003)                 | -0.007*<br>(0.004)                      | 0.003<br>(0.003)                                    |
| Inpatient admissions age 15-29 (%)                     | 0.0004<br>(0.006)                         | 0.002<br>(0.008)                | -0.016**<br>(0.007)             | -0.004<br>(0.004)                | -0.005<br>(0.005)                       | -0.0004<br>(0.003)                                  |
| Inpatient admissions age 30-44 (%)                     | 0.004<br>(0.006)                          | 0.009<br>(0.008)                | 0.005<br>(0.008)                | 0.007*<br>(0.004)                | 0.004<br>(0.005)                        | 0.005*<br>(0.003)                                   |
| Inpatient admissions age 45-59 (%)                     | 0.003<br>(0.006)                          | 0.007<br>(0.008)                | -0.008<br>(0.007)               | 0.002<br>(0.004)                 | -0.002<br>(0.004)                       | 0.002<br>(0.003)                                    |
| Inpatient admissions age 60-74 (%)                     | 0.0003<br>(0.006)                         | 0.007<br>(0.007)                | -0.004<br>(0.007)               | 0.002<br>(0.004)                 | 0.001<br>(0.004)                        | 0.003<br>(0.003)                                    |
| Inpatient admissions age 75-89 (%)                     | 0.005<br>(0.006)                          | 0.007<br>(0.008)                | -0.002<br>(0.008)               | 0.004<br>(0.004)                 | 0.002<br>(0.004)                        | 0.001<br>(0.003)                                    |
| Inpatient admissions age 90+ (%)                       | -0.009<br>(0.008)                         | -0.001<br>(0.010)               | -0.031***<br>(0.012)            | -0.012**<br>(0.006)              | -0.008<br>(0.007)                       | -0.002<br>(0.004)                                   |
| Specialist status                                      | 0.007<br>(0.033)                          | -0.040<br>(0.039)               | -0.043<br>(0.042)               | -0.022<br>(0.021)                |                                         | -0.018<br>(0.016)                                   |
| Financial Year 2017/18                                 |                                           |                                 |                                 | -0.035***<br>(0.007)             |                                         |                                                     |
| Financial Year 2018/19                                 |                                           |                                 |                                 | -0.042***<br>(0.007)             |                                         |                                                     |
| Lagged log Referral to treatment in 18 weeks (%)       |                                           |                                 |                                 |                                  |                                         | 0.752***<br>(0.041)                                 |
| Constant                                               | 2.591***<br>(0.794)                       | 0.833<br>(0.973)                | 3.858***<br>(0.922)             | 2.486***<br>(0.498)              |                                         | 0.445<br>(0.394)                                    |
| Observations                                           | 148                                       | 143                             | 131                             | 422                              | 422                                     | 410                                                 |
| R <sup>2</sup>                                         | 0.178                                     | 0.314                           | 0.320                           | 0.298                            | 0.076                                   | 0.591                                               |
| Adjusted R <sup>2</sup>                                | 0.085                                     | 0.233                           | 0.231                           | 0.268                            | -0.526                                  | 0.574                                               |
| F Statistic                                            | 1.911** (df = 15; 132)                    | 3.880*** (df = 15; 127)         | 3.603*** (df = 15; 115)         | 10.080*** (df = 17; 404)         | 1.493 (df = 14; 255)                    | 35.478*** (df = 16; 393)                            |

Note:

\*p<0.1; \*\*p<0.05; \*\*\*p<0.01

Table 18: Summary Hospital-level Mortality Indicator against Management (FTE)

|                                                    | <i>Dependent variable:</i>                 |                                 |                                 |                                  |                                         |                                                     |                                  |                                         |                                                     |
|----------------------------------------------------|--------------------------------------------|---------------------------------|---------------------------------|----------------------------------|-----------------------------------------|-----------------------------------------------------|----------------------------------|-----------------------------------------|-----------------------------------------------------|
|                                                    | Summary Hospital-level Mortality Indicator |                                 |                                 |                                  |                                         |                                                     |                                  |                                         |                                                     |
|                                                    | <i>cross-section</i><br>2016/17            | <i>cross-section</i><br>2017/18 | <i>cross-section</i><br>2018/19 | <i>pooled</i><br>2016/17-2018/19 | <i>fixed effects</i><br>2016/17-2018/19 | <i>lagged dependent variable</i><br>2016/17-2018/19 | <i>pooled</i><br>2012/13-2018/19 | <i>fixed effects</i><br>2012/13-2018/19 | <i>lagged dependent variable</i><br>2012/13-2018/19 |
| (1)                                                | (2)                                        | (3)                             | (4)                             | (5)                              | (6)                                     | (7)                                                 | (8)                              | (9)                                     |                                                     |
| Managers (FTE)                                     | -0.0004*<br>(0.0002)                       | -0.0002<br>(0.0003)             | 0.0002<br>(0.0003)              | -0.0001<br>(0.0001)              | -0.0001<br>(0.0002)                     | 0.0001<br>(0.0001)                                  |                                  |                                         |                                                     |
| Managers (FTE) squared                             | 0.00000<br>(0.00000)                       | 0.00000<br>(0.00000)            | -0.00000<br>(0.00000)           | 0.00000<br>(0.00000)             | -0.00000<br>(0.00000)                   | -0.00000<br>(0.00000)                               |                                  |                                         |                                                     |
| Managers (FTE - basic definition)                  |                                            |                                 |                                 |                                  |                                         |                                                     | -0.0002<br>(0.0001)              | -0.0001<br>(0.0002)                     | -0.00004<br>(0.0001)                                |
| Managers (FTE basic definition) squared            |                                            |                                 |                                 |                                  |                                         |                                                     | 0.00000<br>(0.00000)             | 0.00000<br>(0.00000)                    | 0.000<br>(0.00000)                                  |
| Senior doctors (FTE)                               | -0.0002<br>(0.0002)                        | -0.0002<br>(0.0002)             | -0.0001<br>(0.0002)             | -0.0002<br>(0.0001)              | 0.001**<br>(0.0002)                     | -0.00001<br>(0.0001)                                | -0.0001<br>(0.0001)              | 0.0002<br>(0.0001)                      | -0.0001<br>(0.0001)                                 |
| NHS staff survey consolidated management score (%) | -0.001<br>(0.003)                          | -0.003<br>(0.003)               | -0.002<br>(0.003)               | -0.001<br>(0.002)                | 0.003<br>(0.002)                        | 0.0002<br>(0.001)                                   | -0.001<br>(0.001)                | 0.0001<br>(0.001)                       | 0.001<br>(0.001)                                    |
| Beds (total number)                                | 0.0003***<br>(0.0001)                      | 0.0002***<br>(0.0001)           | 0.0002***<br>(0.0001)           | 0.0002***<br>(0.00004)           | 0.00000<br>(0.0001)                     | 0.00004<br>(0.00002)                                | 0.0001***<br>(0.00002)           | 0.00003<br>(0.00003)                    | 0.00003*<br>(0.00002)                               |
| Total Operating Cost (£ million)                   | -0.00003<br>(0.0001)                       | -0.00003<br>(0.0001)            | -0.0001<br>(0.0002)             | -0.00004<br>(0.0001)             | 0.0003*<br>(0.0002)                     | 0.00001<br>(0.00004)                                | -0.0001**<br>(0.00004)           | 0.0001<br>(0.0001)                      | 0.00003<br>(0.00003)                                |
| Total inpatient admissions                         | -0.00000***<br>(0.00000)                   | -0.00000**<br>(0.00000)         | -0.00000*<br>(0.00000)          | -0.00000***<br>(0.00000)         | -0.00000***<br>(0.00000)                | -0.00000**<br>(0.00000)                             | -0.00000**<br>(0.00000)          | -0.00000***<br>(0.00000)                | -0.00000<br>(0.00000)                               |
| Female share of inpatient admissions (%)           | 0.0003<br>(0.002)                          | -0.0002<br>(0.002)              | -0.001<br>(0.003)               | -0.0004<br>(0.001)               | -0.003<br>(0.003)                       | -0.0001<br>(0.001)                                  | -0.00003<br>(0.001)              | 0.0001<br>(0.001)                       | -0.0002<br>(0.0004)                                 |
| Inpatient admissions age 0-14 (%)                  | 0.004<br>(0.009)                           | 0.016<br>(0.010)                | -0.004<br>(0.011)               | 0.003<br>(0.005)                 | -0.006<br>(0.005)                       | 0.0001<br>(0.003)                                   | 0.006*<br>(0.003)                | 0.003<br>(0.003)                        | 0.002<br>(0.002)                                    |
| Inpatient admissions age 15-29 (%)                 | 0.014<br>(0.010)                           | 0.034***<br>(0.011)             | 0.017<br>(0.012)                | 0.019***<br>(0.006)              | -0.008<br>(0.006)                       | 0.007*<br>(0.004)                                   | 0.017***<br>(0.004)              | -0.004<br>(0.004)                       | 0.007**<br>(0.003)                                  |
| Inpatient admissions age 30-44 (%)                 | -0.006<br>(0.009)                          | 0.003<br>(0.011)                | -0.020*<br>(0.012)              | -0.011*<br>(0.006)               | -0.002<br>(0.007)                       | -0.004<br>(0.004)                                   | -0.010***<br>(0.004)             | 0.001<br>(0.004)                        | -0.004<br>(0.003)                                   |
| Inpatient admissions age 45-59 (%)                 | -0.008<br>(0.010)                          | 0.007<br>(0.010)                | -0.016<br>(0.012)               | -0.008<br>(0.006)                | -0.004<br>(0.005)                       | -0.003<br>(0.004)                                   | 0.002<br>(0.004)                 | -0.004<br>(0.003)                       | 0.001<br>(0.003)                                    |
| Inpatient admissions age 60-74 (%)                 | 0.016*<br>(0.009)                          | 0.024**<br>(0.010)              | 0.001<br>(0.011)                | 0.011**<br>(0.006)               | -0.004<br>(0.005)                       | 0.002<br>(0.004)                                    | 0.009**<br>(0.003)               | -0.005<br>(0.003)                       | 0.002<br>(0.002)                                    |
| Inpatient admissions age 75-89 (%)                 | 0.006<br>(0.010)                           | 0.023*<br>(0.012)               | 0.003<br>(0.013)                | 0.007<br>(0.006)                 | 0.002<br>(0.005)                        | 0.003<br>(0.004)                                    | 0.010***<br>(0.004)              | 0.007**<br>(0.003)                      | 0.004<br>(0.003)                                    |
| Inpatient admissions age 90+ (%)                   | -0.017<br>(0.014)                          | -0.002<br>(0.015)               | -0.027<br>(0.019)               | -0.015*<br>(0.009)               | 0.009<br>(0.008)                        | -0.005<br>(0.005)                                   | -0.015***<br>(0.005)             | -0.001<br>(0.005)                       | -0.002<br>(0.004)                                   |
| Financial Year 2013/14                             |                                            |                                 |                                 |                                  |                                         |                                                     | 0.003<br>(0.009)                 |                                         |                                                     |
| Financial Year 2014/15                             |                                            |                                 |                                 |                                  |                                         |                                                     | 0.008<br>(0.009)                 |                                         |                                                     |
| Financial Year 2015/16                             |                                            |                                 |                                 |                                  |                                         |                                                     | 0.017*<br>(0.010)                |                                         |                                                     |
| Financial Year 2016/17                             |                                            |                                 |                                 |                                  |                                         |                                                     | 0.027**<br>(0.013)               |                                         |                                                     |
| Financial Year 2017/18                             |                                            |                                 |                                 | 0.006<br>(0.009)                 |                                         |                                                     | 0.030**<br>(0.013)               |                                         |                                                     |
| Financial Year 2018/19                             |                                            |                                 |                                 | 0.022**<br>(0.010)               |                                         |                                                     | 0.040***<br>(0.013)              |                                         |                                                     |
| Lagged Summary Hospital-level Mortality Indicator  |                                            |                                 |                                 |                                  |                                         |                                                     |                                  |                                         | 0.821***<br>(0.034)                                 |
| Constant                                           | 0.695<br>(0.931)                           | -0.502<br>(0.963)               | 1.572<br>(1.052)                | 0.808<br>(0.532)                 |                                         | 0.114<br>(0.335)                                    | 0.533<br>(0.326)                 |                                         | 0.029<br>(0.236)                                    |
| Observations                                       | 134                                        | 129                             | 114                             | 377                              | 377                                     | 376                                                 | 893                              | 893                                     | 758                                                 |
| R <sup>2</sup>                                     | 0.502                                      | 0.534                           | 0.460                           | 0.476                            | 0.110                                   | 0.795                                               | 0.457                            | 0.048                                   | 0.755                                               |
| Adjusted R <sup>2</sup>                            | 0.439                                      | 0.473                           | 0.377                           | 0.451                            | -0.481                                  | 0.786                                               | 0.444                            | -0.151                                  | 0.749                                               |
| F Statistic                                        | 7.946*** (df = 15; 118)                    | 8.644*** (df = 15; 113)         | 5.555*** (df = 15; 98)          | 19.187*** (df = 17; 359)         | 1.859** (df = 15; 226)                  | 86.922*** (df = 16; 359)                            | 34.927*** (df = 21; 871)         | 2.480*** (df = 15; 738)                 | 142.387*** (df = 16; 741)                           |

Note:

\*p<0.1; \*\*p<0.05; \*\*\*p<0.01

Table 19: log Summary Hospital-level Mortality Indicator against log Management (FTE)

|                                                        | <i>Dependent variable:</i>                     |                                 |                                 |                                  |                                         |                                                     |                                  |                                         |                                                     |
|--------------------------------------------------------|------------------------------------------------|---------------------------------|---------------------------------|----------------------------------|-----------------------------------------|-----------------------------------------------------|----------------------------------|-----------------------------------------|-----------------------------------------------------|
|                                                        | log Summary Hospital-level Mortality Indicator |                                 |                                 |                                  |                                         |                                                     |                                  |                                         |                                                     |
|                                                        | <i>cross-section</i><br>2016/17                | <i>cross-section</i><br>2017/18 | <i>cross-section</i><br>2018/19 | <i>pooled</i><br>2016/17-2018/19 | <i>fixed effects</i><br>2016/17-2018/19 | <i>lagged dependent variable</i><br>2016/17-2018/19 | <i>pooled</i><br>2012/13-2018/19 | <i>fixed effects</i><br>2012/13-2018/19 | <i>lagged dependent variable</i><br>2012/13-2018/19 |
| (1)                                                    | (2)                                            | (3)                             | (4)                             | (5)                              | (6)                                     | (7)                                                 | (8)                              | (9)                                     |                                                     |
| log Managers (FTE)                                     | -0.028*<br>(0.015)                             | -0.024<br>(0.019)               | -0.006<br>(0.023)               | -0.021**<br>(0.010)              | -0.021*<br>(0.012)                      | 0.003<br>(0.006)                                    |                                  |                                         |                                                     |
| log Managers (FTE - basic definition)                  |                                                |                                 |                                 |                                  |                                         |                                                     | -0.022***<br>(0.007)             | -0.005<br>(0.012)                       | -0.004<br>(0.005)                                   |
| log Senior doctors (FTE)                               | -0.076*<br>(0.043)                             | -0.086*<br>(0.048)              | -0.051<br>(0.055)               | -0.073***<br>(0.027)             | 0.085<br>(0.066)                        | -0.003<br>(0.016)                                   | -0.066***<br>(0.015)             | 0.027<br>(0.032)                        | -0.011<br>(0.011)                                   |
| log NHS staff survey consolidated management score (%) | 0.013<br>(0.194)                               | -0.098<br>(0.204)               | -0.048<br>(0.202)               | -0.020<br>(0.110)                | 0.147<br>(0.143)                        | 0.013<br>(0.067)                                    | -0.004<br>(0.062)                | 0.012<br>(0.065)                        | 0.049<br>(0.042)                                    |
| log Beds (total number)                                | 0.187***<br>(0.055)                            | 0.168***<br>(0.051)             | 0.161***<br>(0.051)             | 0.169***<br>(0.029)              | 0.012<br>(0.060)                        | 0.035**<br>(0.017)                                  | 0.146***<br>(0.017)              | 0.034<br>(0.024)                        | 0.022*<br>(0.013)                                   |
| Total Operating Cost (£ million)                       | -0.00002<br>(0.0001)                           | -0.00003<br>(0.0001)            | -0.0001<br>(0.0001)             | -0.00004<br>(0.00004)            | 0.0003**<br>(0.0001)                    | 0.00000<br>(0.00002)                                | -0.0001***<br>(0.00002)          | 0.0002**<br>(0.0001)                    | 0.00001<br>(0.00002)                                |
| Total inpatient admissions                             | -0.00000**<br>(0.00000)                        | -0.00000<br>(0.00000)           | -0.00000<br>(0.00000)           | -0.00000**<br>(0.00000)          | -0.00000***<br>(0.00000)                | -0.00000**<br>(0.00000)                             | -0.00000*<br>(0.00000)           | -0.00000***<br>(0.00000)                | -0.00000<br>(0.00000)                               |
| Female share of inpatient admissions (%)               | 0.0002<br>(0.002)                              | 0.00004<br>(0.002)              | -0.001<br>(0.003)               | -0.0005<br>(0.001)               | -0.003<br>(0.003)                       | -0.0001<br>(0.001)                                  | -0.001<br>(0.001)                | -0.0001<br>(0.001)                      | -0.0001<br>(0.0004)                                 |
| Inpatient admissions age 0-14 (%)                      | 0.002<br>(0.009)                               | 0.014<br>(0.010)                | -0.001<br>(0.011)               | 0.003<br>(0.005)                 | -0.007<br>(0.005)                       | 0.0001<br>(0.003)                                   | 0.006*<br>(0.003)                | 0.003<br>(0.003)                        | 0.002<br>(0.002)                                    |
| Inpatient admissions age 15-29 (%)                     | 0.014<br>(0.010)                               | 0.033***<br>(0.011)             | 0.020*<br>(0.012)               | 0.020***<br>(0.006)              | -0.009<br>(0.006)                       | 0.007*<br>(0.004)                                   | 0.017***<br>(0.004)              | -0.004<br>(0.004)                       | 0.007**<br>(0.003)                                  |
| Inpatient admissions age 30-44 (%)                     | -0.011<br>(0.009)                              | -0.001<br>(0.011)               | -0.019<br>(0.012)               | -0.012**<br>(0.006)              | -0.001<br>(0.007)                       | -0.004<br>(0.004)                                   | -0.011***<br>(0.004)             | 0.0004<br>(0.004)                       | -0.004*<br>(0.003)                                  |
| Inpatient admissions age 45-59 (%)                     | -0.010<br>(0.010)                              | 0.007<br>(0.011)                | -0.012<br>(0.012)               | -0.007<br>(0.006)                | -0.003<br>(0.005)                       | -0.003<br>(0.004)                                   | 0.001<br>(0.004)                 | -0.005<br>(0.003)                       | 0.001<br>(0.003)                                    |
| Inpatient admissions age 60-74 (%)                     | 0.014<br>(0.009)                               | 0.021**<br>(0.011)              | 0.004<br>(0.011)                | 0.012**<br>(0.006)               | -0.005<br>(0.005)                       | 0.002<br>(0.003)                                    | 0.009**<br>(0.003)               | -0.004<br>(0.003)                       | 0.002<br>(0.003)                                    |
| Inpatient admissions age 75-89 (%)                     | 0.002<br>(0.010)                               | 0.020<br>(0.012)                | 0.006<br>(0.014)                | 0.006<br>(0.006)                 | 0.0003<br>(0.005)                       | 0.003<br>(0.004)                                    | 0.009**<br>(0.004)               | 0.006*<br>(0.003)                       | 0.004<br>(0.003)                                    |
| Inpatient admissions age 90+ (%)                       | -0.013<br>(0.014)                              | 0.001<br>(0.015)                | -0.024<br>(0.019)               | -0.012<br>(0.009)                | -0.012<br>(0.008)                       | -0.003<br>(0.005)                                   | -0.012**<br>(0.005)              | -0.001<br>(0.005)                       | -0.002<br>(0.004)                                   |
| Financial Year 2013/14                                 |                                                |                                 |                                 |                                  |                                         |                                                     | 0.004<br>(0.009)                 |                                         |                                                     |
| Financial Year 2014/15                                 |                                                |                                 |                                 |                                  |                                         |                                                     | 0.011<br>(0.009)                 |                                         |                                                     |
| Financial Year 2015/16                                 |                                                |                                 |                                 |                                  |                                         |                                                     | 0.018*<br>(0.010)                |                                         |                                                     |
| Financial Year 2016/17                                 |                                                |                                 |                                 |                                  |                                         |                                                     | 0.024*<br>(0.013)                |                                         |                                                     |
| Financial Year 2017/18                                 |                                                |                                 |                                 | 0.007<br>(0.009)                 |                                         |                                                     | 0.028**<br>(0.013)               |                                         |                                                     |
| Financial Year 2018/19                                 |                                                |                                 |                                 | 0.024**<br>(0.010)               |                                         |                                                     | 0.040***<br>(0.014)              |                                         |                                                     |
| Lagged log Summary Hospital-level Mortality Indicator  |                                                |                                 |                                 |                                  |                                         |                                                     | 0.829***<br>(0.033)              |                                         | 0.757**<br>(0.025)                                  |
| Constant                                               | -0.807<br>(1.295)                              | -1.567<br>(1.297)               | -0.255<br>(1.407)               | -0.743<br>(0.721)                |                                         |                                                     | -0.300<br>(0.441)                | -0.881**<br>(0.430)                     | -0.431<br>(0.310)                                   |
| Observations                                           | 134                                            | 129                             | 114                             | 377                              | 377                                     | 376                                                 | 893                              | 893                                     | 758                                                 |
| R <sup>2</sup>                                         | 0.516                                          | 0.555                           | 0.490                           | 0.505                            | 0.098                                   | 0.815                                               | 0.496                            | 0.947                                   | 0.770                                               |
| Adjusted R <sup>2</sup>                                | 0.459                                          | 0.500                           | 0.417                           | 0.483                            | -0.494                                  | 0.808                                               | 0.484                            | -0.150                                  | 0.765                                               |
| F Statistic                                            | 9.050*** (df = 14; 119)                        | 10.147*** (df = 14; 114)        | 6.781*** (df = 14; 99)          | 22.951*** (df = 16; 360)         | 1.765** (df = 14; 227)                  | 105.882*** (df = 15; 360)                           | 42.830*** (df = 20; 872)         | 2.629*** (df = 14; 730)                 | 165.484*** (df = 15; 742)                           |

Note:

\*p<0.1; \*\*p<0.05; \*\*\*p<0.01

Table 20: Summary Hospital-level Mortality Indicator against Management Spend (£)

|                                                    | <i>Dependent variable:</i>                 |                                  |                                  |                                   |                                          |                                                      |
|----------------------------------------------------|--------------------------------------------|----------------------------------|----------------------------------|-----------------------------------|------------------------------------------|------------------------------------------------------|
|                                                    | Summary Hospital-level Mortality Indicator |                                  |                                  |                                   |                                          |                                                      |
|                                                    | <i>cross-section<br/>2016/17</i>           | <i>cross-section<br/>2017/18</i> | <i>cross-section<br/>2018/19</i> | <i>pooled<br/>2016/17-2018/19</i> | <i>fixed effects<br/>2016/17-2018/19</i> | <i>lagged dependent variable<br/>2016/17-2018/19</i> |
| (1)                                                | (2)                                        | (3)                              | (4)                              | (5)                               | (6)                                      |                                                      |
| Management spend (£ million)                       | -0.007<br>(0.005)                          | -0.001<br>(0.005)                | 0.006<br>(0.006)                 | -0.0004<br>(0.003)                | 0.004<br>(0.004)                         | 0.003*<br>(0.002)                                    |
| Management spend (£ million) squared               | 0.000<br>(0.000)                           | -0.000<br>(0.000)                | -0.000<br>(0.000)                | -0.000<br>(0.000)                 | -0.000*<br>(0.000)                       | -0.000*<br>(0.000)                                   |
| Senior doctors (FTE)                               | -0.0002<br>(0.0002)                        | -0.0002<br>(0.0002)              | -0.0001<br>(0.0002)              | -0.0001<br>(0.0001)               | 0.0005**<br>(0.0002)                     | -0.00002<br>(0.0001)                                 |
| NHS staff survey consolidated management score (%) | -0.001<br>(0.003)                          | -0.003<br>(0.003)                | -0.002<br>(0.003)                | -0.002<br>(0.002)                 | 0.002<br>(0.002)                         | 0.0003<br>(0.001)                                    |
| Beds (total number)                                | 0.0003***<br>(0.0001)                      | 0.0002***<br>(0.0001)            | 0.0002***<br>(0.0001)            | 0.0002***<br>(0.00004)            | 0.00002<br>(0.0001)                      | 0.00003<br>(0.00002)                                 |
| Total Operating Cost (£ million)                   | -0.0001<br>(0.0001)                        | -0.00003<br>(0.0001)             | -0.0001<br>(0.0002)              | -0.0001<br>(0.0001)               | 0.0003<br>(0.0002)                       | 0.00002<br>(0.00004)                                 |
| Total inpatient admissions                         | -0.00000***<br>(0.00000)                   | -0.00000**<br>(0.00000)          | -0.00000*<br>(0.00000)           | -0.00000***<br>(0.00000)          | -0.00000***<br>(0.00000)                 | -0.00000**<br>(0.00000)                              |
| Female share of inpatient admissions (%)           | 0.0004<br>(0.002)                          | 0.0002<br>(0.002)                | -0.001<br>(0.003)                | -0.0001<br>(0.001)                | -0.003<br>(0.003)                        | -0.00002<br>(0.001)                                  |
| Inpatient admissions age 0-14 (%)                  | 0.005<br>(0.009)                           | 0.016*<br>(0.010)                | -0.003<br>(0.011)                | 0.003<br>(0.005)                  | -0.006<br>(0.005)                        | 0.0005<br>(0.003)                                    |
| Inpatient admissions age 15-29 (%)                 | 0.015<br>(0.010)                           | 0.034***<br>(0.011)              | 0.018<br>(0.012)                 | 0.019***<br>(0.006)               | -0.008<br>(0.006)                        | 0.007**<br>(0.004)                                   |
| Inpatient admissions age 30-44 (%)                 | -0.006<br>(0.009)                          | 0.004<br>(0.011)                 | -0.019<br>(0.012)                | -0.010*<br>(0.006)                | -0.001<br>(0.007)                        | -0.003<br>(0.004)                                    |
| Inpatient admissions age 45-59 (%)                 | -0.008<br>(0.010)                          | 0.007<br>(0.010)                 | -0.014<br>(0.012)                | -0.007<br>(0.006)                 | -0.004<br>(0.005)                        | -0.003<br>(0.004)                                    |
| Inpatient admissions age 60-74 (%)                 | 0.016*<br>(0.009)                          | 0.024**<br>(0.011)               | 0.003<br>(0.011)                 | 0.012**<br>(0.006)                | -0.003<br>(0.005)                        | 0.002<br>(0.004)                                     |
| Inpatient admissions age 75-89 (%)                 | 0.007<br>(0.010)                           | 0.023**<br>(0.012)               | 0.004<br>(0.013)                 | 0.008<br>(0.006)                  | 0.001<br>(0.005)                         | 0.003<br>(0.004)                                     |
| Inpatient admissions age 90+ (%)                   | -0.016<br>(0.014)                          | -0.001<br>(0.015)                | -0.026<br>(0.019)                | -0.015*<br>(0.009)                | 0.009<br>(0.008)                         | -0.004<br>(0.005)                                    |
| Financial Year 2017/18                             |                                            |                                  |                                  | 0.006<br>(0.009)                  |                                          |                                                      |
| Financial Year 2018/19                             |                                            |                                  |                                  | 0.022**<br>(0.010)                |                                          |                                                      |
| Lagged Summary Hospital-level Mortality Indicator  |                                            |                                  |                                  |                                   |                                          | 0.822***<br>(0.034)                                  |
| Constant                                           | 0.647<br>(0.932)                           | -0.580<br>(0.974)                | 1.456<br>(1.061)                 | 0.750<br>(0.534)                  |                                          | 0.063<br>(0.334)                                     |
| Observations                                       | 134                                        | 129                              | 114                              | 377                               | 377                                      | 376                                                  |
| R <sup>2</sup>                                     | 0.498                                      | 0.531                            | 0.460                            | 0.474                             | 0.123                                    | 0.796                                                |
| Adjusted R <sup>2</sup>                            | 0.435                                      | 0.468                            | 0.377                            | 0.449                             | -0.460                                   | 0.787                                                |
| F Statistic                                        | 7.816*** (df = 15; 118)                    | 8.522*** (df = 15; 113)          | 5.558*** (df = 15; 98)           | 19.034*** (df = 17; 359)          | 2.105** (df = 15; 226)                   | 87.694*** (df = 16; 359)                             |

Note:

\*p<0.1; \*\*p<0.05; \*\*\*p<0.01

Table 21: log Summary Hospital-level Mortality Indicator against log Management Spend (£)

|                                                        | <i>Dependent variable:</i>                     |                                 |                                 |                                  |                                         |                                                     |
|--------------------------------------------------------|------------------------------------------------|---------------------------------|---------------------------------|----------------------------------|-----------------------------------------|-----------------------------------------------------|
|                                                        | log Summary Hospital-level Mortality Indicator |                                 |                                 |                                  |                                         |                                                     |
|                                                        | <i>cross-section</i><br>2016/17                | <i>cross-section</i><br>2017/18 | <i>cross-section</i><br>2018/19 | <i>pooled</i><br>2016/17-2018/19 | <i>fixed effects</i><br>2016/17-2018/19 | <i>lagged dependent variable</i><br>2016/17-2018/19 |
| (1)                                                    | (2)                                            | (3)                             | (4)                             | (5)                              | (6)                                     |                                                     |
| log Management spend (£ million)                       | -0.029<br>(0.018)                              | -0.019<br>(0.022)               | 0.006<br>(0.025)                | -0.015<br>(0.012)                | -0.016<br>(0.011)                       | 0.003<br>(0.007)                                    |
| log Senior doctors (FTE)                               | -0.073*<br>(0.043)                             | -0.086*<br>(0.048)              | -0.057<br>(0.055)               | -0.074***<br>(0.027)             | 0.083<br>(0.066)                        | -0.004<br>(0.016)                                   |
| log NHS staff survey consolidated management score (%) | 0.010<br>(0.195)                               | -0.112<br>(0.206)               | -0.076<br>(0.202)               | -0.033<br>(0.111)                | 0.142<br>(0.143)                        | 0.013<br>(0.067)                                    |
| log Beds (total number)                                | 0.184***<br>(0.056)                            | 0.162***<br>(0.051)             | 0.156***<br>(0.051)             | 0.163***<br>(0.029)              | 0.011<br>(0.060)                        | 0.035**<br>(0.017)                                  |
| Total Operating Cost (£ million)                       | -0.00001<br>(0.0001)                           | -0.00002<br>(0.0001)            | -0.0001<br>(0.0001)             | -0.00004<br>(0.00004)            | 0.0003**<br>(0.0001)                    | 0.00000<br>(0.00002)                                |
| Total inpatient admissions                             | -0.00000**<br>(0.00000)                        | -0.00000<br>(0.00000)           | -0.00000<br>(0.00000)           | -0.00000**<br>(0.00000)          | -0.00000***<br>(0.00000)                | -0.00000**<br>(0.00000)                             |
| Female share of inpatient admissions (%)               | 0.0004<br>(0.002)                              | 0.0003<br>(0.002)               | -0.001<br>(0.003)               | -0.0002<br>(0.001)               | -0.004<br>(0.003)                       | -0.0001<br>(0.001)                                  |
| Inpatient admissions age 0-14 (%)                      | 0.003<br>(0.009)                               | 0.015<br>(0.010)                | -0.001<br>(0.011)               | 0.003<br>(0.005)                 | -0.007<br>(0.005)                       | 0.00003<br>(0.003)                                  |
| Inpatient admissions age 15-29 (%)                     | 0.014<br>(0.010)                               | 0.033***<br>(0.011)             | 0.020*<br>(0.012)               | 0.020***<br>(0.006)              | -0.009<br>(0.006)                       | 0.007*<br>(0.004)                                   |
| Inpatient admissions age 30-44 (%)                     | -0.011<br>(0.009)                              | -0.001<br>(0.011)               | -0.020<br>(0.012)               | -0.012**<br>(0.006)              | -0.001<br>(0.007)                       | -0.004<br>(0.004)                                   |
| Inpatient admissions age 45-59 (%)                     | -0.010<br>(0.010)                              | 0.007<br>(0.011)                | -0.013<br>(0.012)               | -0.007<br>(0.006)                | -0.004<br>(0.005)                       | -0.003<br>(0.004)                                   |
| Inpatient admissions age 60-74 (%)                     | 0.014<br>(0.009)                               | 0.021**<br>(0.011)              | 0.004<br>(0.011)                | 0.012**<br>(0.006)               | -0.004<br>(0.005)                       | 0.002<br>(0.003)                                    |
| Inpatient admissions age 75-89 (%)                     | 0.003<br>(0.010)                               | 0.020<br>(0.012)                | 0.006<br>(0.014)                | 0.007<br>(0.006)                 | -0.00001<br>(0.005)                     | 0.003<br>(0.004)                                    |
| Inpatient admissions age 90+ (%)                       | -0.013<br>(0.014)                              | 0.003<br>(0.015)                | -0.024<br>(0.019)               | -0.011<br>(0.009)                | 0.010<br>(0.008)                        | -0.003<br>(0.005)                                   |
| Financial Year 2017/18                                 |                                                |                                 |                                 | 0.007<br>(0.009)                 |                                         |                                                     |
| Financial Year 2018/19                                 |                                                |                                 |                                 | 0.024**<br>(0.010)               |                                         |                                                     |
| Lagged log Summary Hospital-level Mortality Indicator  |                                                |                                 |                                 |                                  |                                         | 0.828***<br>(0.033)                                 |
| Constant                                               | -0.918<br>(1.296)                              | -1.593<br>(1.340)               | -0.101<br>(1.427)               | -0.766<br>(0.730)                |                                         | -0.287<br>(0.445)                                   |
| Observations                                           | 134                                            | 129                             | 114                             | 377                              | 377                                     | 376                                                 |
| R <sup>2</sup>                                         | 0.513                                          | 0.552                           | 0.489                           | 0.502                            | 0.096                                   | 0.815                                               |
| Adjusted R <sup>2</sup>                                | 0.455                                          | 0.497                           | 0.417                           | 0.480                            | -0.498                                  | 0.808                                               |
| F Statistic                                            | 8.947*** (df = 14; 119)                        | 10.020*** (df = 14; 114)        | 6.780*** (df = 14; 99)          | 22.653*** (df = 16; 360)         | 1.712* (df = 14; 227)                   | 105.874*** (df = 15; 360)                           |

Note:

\*p<0.1; \*\*p<0.05; \*\*\*p<0.01
