# Supplementary material for: The Impact of Management on Hospital Performance
Source: bioRxiv or medRxiv preprint supplement (doi:10.1101/2020.06.02.20119545), 2021-05-25
Supplement: Supplementary file [file media-1.pdf]

# The Impact of Management on Hospital Performance - supplementary appendix

Asaria, Miqdad <sup>\*1,2</sup>, Gershlick, Benjamin<sup>2,3</sup>, McGuire, Alistair<sup>1</sup> and Street, Andrew<sup>1</sup>

<sup>1</sup>Department of Health Policy, London School of Economics and Political Science

<sup>2</sup>Health Foundation, London

<sup>3</sup>NHSE/I, London

## Contents

|          |                                                                                                                                     |           |
|----------|-------------------------------------------------------------------------------------------------------------------------------------|-----------|
| <b>1</b> | <b>Data</b>                                                                                                                         | <b>3</b>  |
| 1.1      | Data sources . . . . .                                                                                                              | 3         |
| 1.2      | Staff survey questions . . . . .                                                                                                    | 3         |
| 1.3      | List of non-specialist NHS hospital trusts in analysis . . . . .                                                                    | 4         |
| <b>2</b> | <b>Descriptive statistics</b>                                                                                                       | <b>9</b>  |
| 2.1      | Change in number of managers over time in NHS . . . . .                                                                             | 9         |
| 2.2      | Distribution of management, control and outcome variables . . . . .                                                                 | 10        |
| 2.3      | Mediators between management input and outcomes . . . . .                                                                           | 13        |
| <b>3</b> | <b>Examining between and within variation in data</b>                                                                               | <b>16</b> |
| 3.1      | Comparison of variation in management measures, controls and outcomes between hospitals versus within hospitals over time . . . . . | 16        |
| 3.2      | Exploring the between and within variation in the relationship between management and outcomes . . . . .                            | 17        |
| <b>4</b> | <b>Alternative specifications of mediation regressions</b>                                                                          | <b>19</b> |
| 4.1      | Number of managers ( $M_1$ ) . . . . .                                                                                              | 19        |
| 4.2      | Number of managers ( $M_3$ ) . . . . .                                                                                              | 20        |
| 4.3      | Spend on managers in £ million ( $M_4$ ) . . . . .                                                                                  | 21        |
| <b>5</b> | <b>Mediation of effect of management quantity on outcomes through NHS staff survey management score</b>                             | <b>22</b> |
| 5.1      | Number of managers ( $M_1$ ) . . . . .                                                                                              | 22        |
| 5.2      | Number of managers ( $M_3$ ) . . . . .                                                                                              | 22        |
| 5.3      | Spend on managers in £ million ( $M_4$ ) . . . . .                                                                                  | 22        |

---

\*Contact Author. Email: m.asaria@lse.ac.uk

|          |                                                                                            |           |
|----------|--------------------------------------------------------------------------------------------|-----------|
| <b>6</b> | <b>Alternative specifications of management regressions</b>                                | <b>23</b> |
| 6.1      | Net financial position (£ million)                                                         | 23        |
| 6.1.1    | Number of managers ( $M_1$ )                                                               | 23        |
| 6.1.2    | Quality of management ( $M_2$ )                                                            | 24        |
| 6.1.3    | Number of managers ( $M_3$ )                                                               | 25        |
| 6.1.4    | Spend on managers in £ million ( $M_4$ )                                                   | 26        |
| 6.2      | Elective waiting time target met (%)                                                       | 27        |
| 6.2.1    | Number of managers ( $M_1$ )                                                               | 27        |
| 6.2.2    | Quality of management ( $M_2$ )                                                            | 28        |
| 6.2.3    | Number of managers ( $M_3$ )                                                               | 29        |
| 6.2.4    | Spend on managers in £ million ( $M_4$ )                                                   | 30        |
| 6.3      | A&E waiting time target met (%)                                                            | 31        |
| 6.3.1    | Number of managers ( $M_1$ )                                                               | 31        |
| 6.3.2    | Quality of management ( $M_2$ )                                                            | 32        |
| 6.3.3    | Number of managers ( $M_3$ )                                                               | 33        |
| 6.3.4    | Spend on managers in £ million ( $M_4$ )                                                   | 34        |
| 6.4      | Total inpatient admissions                                                                 | 35        |
| 6.4.1    | Number of managers ( $M_1$ )                                                               | 35        |
| 6.4.2    | Quality of management ( $M_2$ )                                                            | 36        |
| 6.4.3    | Number of managers ( $M_3$ )                                                               | 37        |
| 6.4.4    | Spend on managers in £ million ( $M_4$ )                                                   | 38        |
| 6.5      | Summary Hospital-level Mortality Indicator                                                 | 39        |
| 6.5.1    | Number of managers ( $M_1$ )                                                               | 39        |
| 6.5.2    | Quality of management ( $M_2$ )                                                            | 40        |
| 6.5.3    | Number of managers ( $M_3$ )                                                               | 41        |
| 6.5.4    | Spend on managers in £ million ( $M_4$ )                                                   | 42        |
| <b>7</b> | <b>Impact of responses to individual questions within the NHS staff survey on outcomes</b> | <b>43</b> |
| 7.1      | Net financial position (£ million)                                                         | 43        |
| 7.2      | Elective waiting time target met (%)                                                       | 44        |
| 7.3      | A&E waiting time target met (%)                                                            | 45        |
| 7.4      | Total inpatient admissions                                                                 | 46        |
| 7.5      | Summary Hospital-level Mortality Indicator                                                 | 47        |

# 1 Data

## 1.1 Data sources

Table 1: Data Sources

| Data                                              | Source                         | URL                                                                                                                                                                                                                                                     |
|---------------------------------------------------|--------------------------------|---------------------------------------------------------------------------------------------------------------------------------------------------------------------------------------------------------------------------------------------------------|
| Inpatient admissions                              | NHS Digital                    | <a href="https://digital.nhs.uk/data-and-information/publications/statistical/hospital-admitted-patient-care-activity/2018-19">https://digital.nhs.uk/data-and-information/publications/statistical/hospital-admitted-patient-care-activity/2018-19</a> |
| Accident and emergency target                     | NHS Digital                    | <a href="https://digital.nhs.uk/data-and-information/publications/statistical/hospital-accident-emergency-activity/2018-19">https://digital.nhs.uk/data-and-information/publications/statistical/hospital-accident-emergency-activity/2018-19</a>       |
| Inpatient admissions referral to treatment target | NHS England                    | <a href="https://www.england.nhs.uk/statistics/statistical-work-areas/rtt-waiting-times/rtt-data-2018-19/">https://www.england.nhs.uk/statistics/statistical-work-areas/rtt-waiting-times/rtt-data-2018-19/</a>                                         |
| NHS staff survey management scores                | NHS survey coordination centre | <a href="https://www.nhsstaffsurveys.com/Page/1064/Latest-Results/2018-Results/">https://www.nhsstaffsurveys.com/Page/1064/Latest-Results/2018-Results/</a>                                                                                             |
| NHS workforce statistics (ESR)                    | NHS Digital                    | <a href="https://digital.nhs.uk/data-and-information/publications/statistical/nhs-workforce-statistics/september-2018">https://digital.nhs.uk/data-and-information/publications/statistical/nhs-workforce-statistics/september-2018</a>                 |
| Summary Hospital-level Mortality Indicator (SHMI) | NHS Digital                    | <a href="https://digital.nhs.uk/data-and-information/publications/clinical-indicators/shmi/">https://digital.nhs.uk/data-and-information/publications/clinical-indicators/shmi/</a>                                                                     |
| Care quality commission rating                    | Care quality commission        | <a href="https://www.cqc.org.uk/about-us/transparency/using-cqc-data">https://www.cqc.org.uk/about-us/transparency/using-cqc-data</a>                                                                                                                   |
| Financial performance of NHS trusts               | NHS Improvement                | <a href="https://improvement.nhs.uk/resources/nhs-providers-trust-accounts-consolidation-tac-data-201718/">https://improvement.nhs.uk/resources/nhs-providers-trust-accounts-consolidation-tac-data-201718/</a>                                         |
| Bed Availability and Occupancy Data Ð Overnight   | NHS England                    | <a href="https://www.england.nhs.uk/statistics/statistical-work-areas/bed-availability-and-occupancy/bed-data-overnight/">https://www.england.nhs.uk/statistics/statistical-work-areas/bed-availability-and-occupancy/bed-data-overnight/</a>           |

## 1.2 Staff survey questions

Table 2: Staff Survey Management Questions

| 7) My immediate manager:                                           | 8) Senior managers:                                                 |
|--------------------------------------------------------------------|---------------------------------------------------------------------|
| a. encourages those who work for her/him to work as a team         | a. I know who the senior managers are here                          |
| b. can be counted on to help me with a difficult task at work      | b. Communication between senior management and staff is effective   |
| c. gives me clear feedback on my work                              | c. Senior managers here try to involve staff in important decisions |
| d. asks for my opinion before making decisions that affect my work | d. Senior managers act on staff feedback                            |
| e. is supportive in a personal crisis                              |                                                                     |
| f. takes a positive interest in my health and well-being           |                                                                     |
| g. values my work                                                  |                                                                     |

### 1.3 List of non-specialist NHS hospital trusts in analysis

Table 3: List of 129 Acute NHS Trusts included in analysis presented in paper with data for 2018/19

| Trust Name                                           | Organisation<br>Code | Managers<br>(% of all staff) | Managers<br>(FTE) | Spend on Management<br>(£ millions) | Staff Survey<br>Management Score |
|------------------------------------------------------|----------------------|------------------------------|-------------------|-------------------------------------|----------------------------------|
| Aintree University Hospital                          | REM                  | 3.27                         | 148.3             | 8.89                                | 63.7                             |
| Airedale                                             | RCF                  | 3.39                         | 85                | 5.06                                | 67.1                             |
| Ashford and St. Peter's Hospitals                    | RTK                  | 2.44                         | 79.5              | 5.39                                | 64.2                             |
| Barking, Havering and Redbridge University Hospitals | RF4                  | 2.57                         | 149.2             | 11.51                               | 63.3                             |
| Barnsley Hospital                                    | RFF                  | 2.52                         | 74.4              | 4.09                                | 65.6                             |
| Barts Health                                         | R1H                  | 2.07                         | 302.1             | 19.76                               | 64.2                             |
| Basildon and Thurrock University Hospitals           | RDD                  | 3.16                         | 133.3             | 8.68                                | 64.0                             |
| Bedford Hospital                                     | RC1                  | 2.34                         | 58.5              | 3.75                                | 64.0                             |
| Blackpool Teaching Hospitals                         | RXL                  | 4.64                         | 288.4             | 15.05                               | 64.5                             |
| Bolton                                               | RMC                  | 1.73                         | 88.5              | 5.74                                | 68.4                             |
| Bradford Teaching Hospitals                          | RAE                  | 2.19                         | 112.8             | 7.39                                | 65.3                             |
| Brighton and Sussex University Hospitals             | RXH                  | 2.63                         | 192.7             | 11.47                               | 64.4                             |
| Buckinghamshire Healthcare                           | RXQ                  | 3.88                         | 197.7             | 11.39                               | 66.2                             |
| Calderdale and Huddersfield                          | RWY                  | 2.42                         | 125.1             | 6.69                                | 63.0                             |
| Cambridge University Hospitals                       | RGT                  | 2.84                         | 262.8             | 16.36                               | 66.6                             |
| Chelsea and Westminster Hospital                     | RQM                  | 4.83                         | 261.7             | 16.06                               | 65.7                             |
| Chesterfield Royal Hospital                          | RFS                  | 1.91                         | 67.1              | 3.81                                | 65.7                             |
| City Hospitals Sunderland                            | RLN                  | 2.46                         | 112.4             | 6.61                                | 65.3                             |
| Colchester Hospital University                       | RDE                  | 2.84                         | 230.8             | 14.27                               | 60.5                             |
| Countess of Chester Hospital                         | RJR                  | 3.11                         | 107.1             | 5.89                                | 63.9                             |
| County Durham and Darlington                         | RXP                  | 3.03                         | 186.6             | 10.52                               | 62.8                             |
| Croydon Health Services                              | RJ6                  | 4.31                         | 139.1             | 8.15                                | 62.2                             |
| Dartford and Gravesham                               | RN7                  | 4.83                         | 139.4             | 7.87                                | 65.5                             |
| Derby Teaching Hospitals                             | RTG                  | 2.81                         | 289.3             | 16.63                               | 64.2                             |
| Doncaster and Bassetlaw Teaching Hospitals           | RP5                  | 3.26                         | 173.7             | 9.42                                | 61.7                             |

Table 3 continued from previous page

| Trust Name                               | Organisation | Managers         | Managers | Spend on Management | Staff Survey     |
|------------------------------------------|--------------|------------------|----------|---------------------|------------------|
|                                          | Code         | (% of all staff) | (FTE)    | (£ millions)        | Management Score |
| Dorset County Hospital                   | RBD          | 3.99             | 90.1     | 5.28                | 66.1             |
| Dudley Group                             | RNA          | 1.3              | 56.1     | 3.43                | 62.8             |
| East and North Hertfordshire             | RWH          | 1.45             | 72.3     | 5.32                | 61.9             |
| East Cheshire                            | RJN          | 3.64             | 80.9     | 4.67                | 67.5             |
| East Kent Hospitals University           | RVV          | 1.73             | 132.8    | 8.44                | 60.5             |
| East Lancashire Hospitals                | RXR          | 3.24             | 238.6    | 13.36               | 67.7             |
| East Sussex Healthcare                   | RXC          | 2.64             | 159.3    | 9.62                | 64.8             |
| Epsom and St Helier University Hospitals | RVR          | 5.67             | 252.5    | 14.94               | 61.4             |
| Frimley Health                           | RDU          | 2.21             | 177      | 11.3                | 68.3             |
| Gateshead Health                         | RR7          | 3.2              | 124.6    | 7.36                | 67.8             |
| George Eliot Hospital                    | RLT          | 2.67             | 53.4     | 3.45                | 62.1             |
| Gloucestershire Hospitals                | RTE          | 2.16             | 140.8    | 8.45                | 62.7             |
| Great Western Hospitals                  | RN3          | 2.32             | 90.7     | 5.82                | 63.9             |
| Guy's and St Thomas'                     | RJ1          | 3.71             | 536.9    | 35.62               | 67.1             |
| Hampshire Hospitals                      | RN5          | 2.9              | 151      | 9.22                | 61.9             |
| Harrogate and District                   | RCD          | 2.58             | 94.5     | 5.48                | 67.0             |
| Hillingdon Hospitals                     | RAS          | 4.33             | 126.2    | 7.83                | 62.9             |
| Homerton University Hospital             | RQX          | 3.12             | 105.3    | 6.64                | 67.9             |
| Hull and East Yorkshire Hospitals        | RWA          | 3.6              | 259.4    | 14.42               | 65.4             |
| Imperial College Healthcare              | RYJ          | 4.56             | 465.5    | 27.69               | 62.6             |
| James Paget University Hospitals         | RGP          | 3.45             | 91.6     | 5.46                | 63.4             |
| Kettering General Hospital               | RNQ          | 3.64             | 125.6    | 7.1                 | 65.0             |
| King's College Hospital                  | RJZ          | 2.63             | 298.3    | 19.7                | 61.7             |
| Kingston Hospital                        | RAX          | 3.37             | 96.8     | 6.77                | 66.9             |
| Lancashire Teaching Hospitals            | RXN          | 2.19             | 151.8    | 9.36                | 63.2             |
| Leeds Teaching Hospitals                 | RR8          | 1.57             | 237.3    | 15.77               | 68.2             |
| Lewisham and Greenwich                   | RJ2          | 3.56             | 197.8    | 12.36               | 65.7             |
| London North West Healthcare             | R1K          | 4.44             | 337.2    | 20.51               | 62.5             |

Table 3 continued from previous page

| Trust Name                               | Organisation | Managers         | Managers | Spend on Management | Staff Survey     |
|------------------------------------------|--------------|------------------|----------|---------------------|------------------|
|                                          | Code         | (% of all staff) | (FTE)    | (£ millions)        | Management Score |
| Luton and Dunstable University Hospital  | RC9          | 4.25             | 158.1    | 9.33                | 67.3             |
| Maidstone and Tunbridge Wells            | RWF          | 3.4              | 167.2    | 9.78                | 62.8             |
| Medway                                   | RPA          | 2.43             | 89       | 5.8                 | 56.5             |
| Mid Cheshire Hospitals                   | RBT          | 2.77             | 102.8    | 5.98                | 65.4             |
| Mid Essex Hospital Services              | RQ8          | 2.73             | 109.1    | 6.71                | 62.7             |
| Mid Yorkshire Hospitals                  | RXF          | 3.35             | 237.5    | 13.19               | 63.3             |
| Milton Keynes University Hospital        | RD8          | 4.51             | 133.5    | 7.99                | 64.2             |
| Newcastle Upon Tyne Hospitals            | RTD          | 1.34             | 170.2    | 9.08                | 66.6             |
| Norfolk and Norwich University Hospitals | RM1          | 1.97             | 133.7    | 8.46                | 61.6             |
| North Bristol                            | RVJ          | 4                | 280.8    | 16.18               | 62.3             |
| North Cumbria University Hospitals       | RNL          | 3.04             | 106.9    | 6.24                | 56.8             |
| North Middlesex University Hospital      | RAP          | 6.1              | 181.7    | 9.92                | 64.5             |
| North Tees and Hartlepool                | RVW          | 3.1              | 140.2    | 8.11                | 66.4             |
| North West Anglia                        | RGN          | 4.01             | 214.1    | 11.69               | 63.3             |
| Northampton General Hospital             | RNS          | 3.83             | 164      | 8.67                | 63.5             |
| Northern Devon Healthcare                | RBZ          | 4.38             | 111.4    | 6.48                | 68.2             |
| Northern Lincolnshire and Goole          | RJL          | 4.91             | 256.5    | 13.82               | 59.4             |
| Northumbria Healthcare                   | RTF          | 4.54             | 310.1    | 17.66               | 68.0             |
| Nottingham University Hospitals          | RX1          | 3.63             | 472.8    | 26.36               | 65.2             |
| Oxford University Hospitals              | RTH          | 2.97             | 314      | 18.56               | 63.8             |
| Pennine Acute Hospitals                  | RW6          | 3.37             | 295.7    | 17.12               | 62.3             |
| Plymouth Hospitals                       | RK9          | 2.28             | 141.8    | 8.99                | 66.4             |
| Poole Hospital                           | RD3          | 2.92             | 98.2     | 5.66                | 65.4             |
| Portsmouth Hospitals                     | RHU          | 7.78             | 493.2    | 24.63               | 65.6             |
| Princess Alexandra Hospital              | RQW          | 5.64             | 168.3    | 10.05               | 66.4             |
| Queen Elizabeth Hospital King's Lynn     | RCX          | 3.96             | 110      | 6.29                | 58.7             |
| Rotherham                                | RFR          | 3.13             | 115.1    | 6.88                | 62.2             |
| Royal Berkshire                          | RHW          | 2.94             | 136.9    | 7.93                | 66.5             |

Table 3 continued from previous page

| Trust Name                                          | Organisation | Managers         | Managers | Spend on Management | Staff Survey     |
|-----------------------------------------------------|--------------|------------------|----------|---------------------|------------------|
|                                                     | Code         | (% of all staff) | (FTE)    | (£ millions)        | Management Score |
| Royal Bournemouth and Christchurch Hospitals        | RDZ          | 2.98             | 118.4    | 7.23                | 69.7             |
| Royal Cornwall Hospitals                            | REF          | 2.42             | 114      | 7.37                | 61.2             |
| Royal Devon and Exeter                              | RH8          | 2.42             | 167.1    | 9.61                | 66.4             |
| Royal Free London                                   | RAL          | 1.6              | 132.9    | 10.05               | 65.2             |
| Royal Liverpool and Broadgreen University Hospitals | RQ6          | 5                | 314.7    | 17.3                | 65.4             |
| Royal Surrey County Hospital                        | RA2          | 4.15             | 149.2    | 9.2                 | 66.5             |
| Royal United Hospitals Bath                         | RD1          | 4                | 177.1    | 10                  | 64.0             |
| Royal Wolverhampton                                 | RL4          | 1.83             | 133      | 8.5                 | 66.4             |
| Salford Royal                                       | RM3          | 3.94             | 285      | 17.4                | 64.8             |
| Salisbury                                           | RNZ          | 2.82             | 81.2     | 4.67                | 65.1             |
| Sandwell and West Birmingham Hospitals              | RXK          | 3.2              | 190.2    | 11.92               | 65.6             |
| Sheffield Teaching Hospitals                        | RHQ          | 2.26             | 315.1    | 19.57               | 65.9             |
| Sherwood Forest Hospitals                           | RK5          | 4.54             | 186      | 10.55               | 67.0             |
| Shrewsbury and Telford Hospital                     | RXW          | 4.84             | 241      | 12.75               | 61.6             |
| South Tees Hospitals                                | RTR          | 2.11             | 156.6    | 9.2                 | 59.4             |
| South Tyneside                                      | RE9          | 2.1              | 58.4     | 3.19                | 63.4             |
| South Warwickshire                                  | RJC          | 3.4              | 133.4    | 7.55                | 66.1             |
| Southend University Hospital                        | RAJ          | 0.26             | 9.8      | 1.03                | 65.4             |
| Southport and Ormskirk Hospital                     | RVY          | 1.9              | 47.8     | 3.33                | 59.1             |
| St George's University Hospitals                    | RJ7          | 2.19             | 176      | 11.94               | 61.4             |
| St Helens and Knowsley Hospitals                    | RBN          | 3.23             | 168.2    | 12.78               | 69.7             |
| Stockport                                           | RWJ          | 3.61             | 162.9    | 9.59                | 63.1             |
| Surrey and Sussex Healthcare                        | RTP          | 2.81             | 102.7    | 6.85                | 70.8             |
| Tameside and Glossop Integrated Care                | RMP          | 2.82             | 95.2     | 6.02                | 64.6             |
| Taunton and Somerset                                | RBA          | 2.57             | 102.7    | 6.11                | 66.0             |
| Torbay and South Devon                              | RA9          | 3.21             | 163.4    | 9.63                | 64.8             |
| United Lincolnshire Hospitals                       | RWD          | 2.26             | 144.8    | 8.84                | 58.5             |
| University College London Hospitals                 | RRV          | 6.2              | 493      | 30.31               | 65.4             |

Table 3 continued from previous page

| Trust Name                                     | Organisation Code | Managers (% of all staff) | Managers (FTE) | Spend on Management (£ millions) | Staff Survey Management Score |
|------------------------------------------------|-------------------|---------------------------|----------------|----------------------------------|-------------------------------|
| University Hospital Southampton                | RHM               | 5.84                      | 563.3          | 28.49                            | 67.9                          |
| University Hospitals Birmingham                | RRK               | 1.85                      | 327.9          | 20.13                            | 63.3                          |
| University Hospitals Bristol                   | RA7               | 2.35                      | 187.7          | 11.98                            | 65.4                          |
| University Hospitals Coventry and Warwickshire | RKB               | 4.54                      | 322.7          | 17.82                            | 65.9                          |
| University Hospitals of Leicester              | RWE               | 1.5                       | 193.3          | 12.79                            | 63.0                          |
| University Hospitals of Morecambe Bay          | RTX               | 3.39                      | 178.6          | 10.23                            | 65.4                          |
| University Hospitals of North Midlands         | RJE               | 2.36                      | 220.5          | 12.97                            | 61.7                          |
| Walsall Healthcare                             | RBK               | 2.78                      | 101.2          | 5.67                             | 63.5                          |
| Warrington and Halton Hospitals                | RWW               | 5.16                      | 180.3          | 9.96                             | 66.2                          |
| West Hertfordshire Hospitals                   | RWG               | 4.02                      | 170.6          | 10.08                            | 67.4                          |
| West Suffolk                                   | RGR               | 4.75                      | 156            | 8.55                             | 67.5                          |
| Western Sussex Hospitals                       | RYR               | 2.04                      | 118.1          | 8.18                             | 66.1                          |
| Weston Area Health                             | RA3               | 1.06                      | 15.2           | 1.03                             | 59.2                          |
| Whittington Hospital                           | RKE               | 4.43                      | 162.8          | 9.68                             | 64.5                          |
| Wirral University Teaching Hospital            | RBL               | 3.39                      | 176.3          | 9.63                             | 60.8                          |
| Worcestershire Acute Hospitals                 | RWP               | 2.45                      | 125.1          | 7.91                             | 60.0                          |
| Wrightington, Wigan and Leigh                  | RRF               | 3.68                      | 159.7          | 9.35                             | 64.0                          |
| Wye Valley                                     | RLQ               | 4.2                       | 110.7          | 6.07                             | 62.2                          |
| Yeovil District Hospital                       | RA4               | 4.04                      | 79.1           | 4.69                             | 68.3                          |
| York Teaching Hospital                         | RCB               | 3.14                      | 220.1          | 12.4                             | 64.4                          |

∞



## 2 Descriptive statistics

### 2.1 Change in number of managers over time in NHS

Figure 1: Managers time series in acute NHS hospital trusts using basic management definition ( $M_1$ )

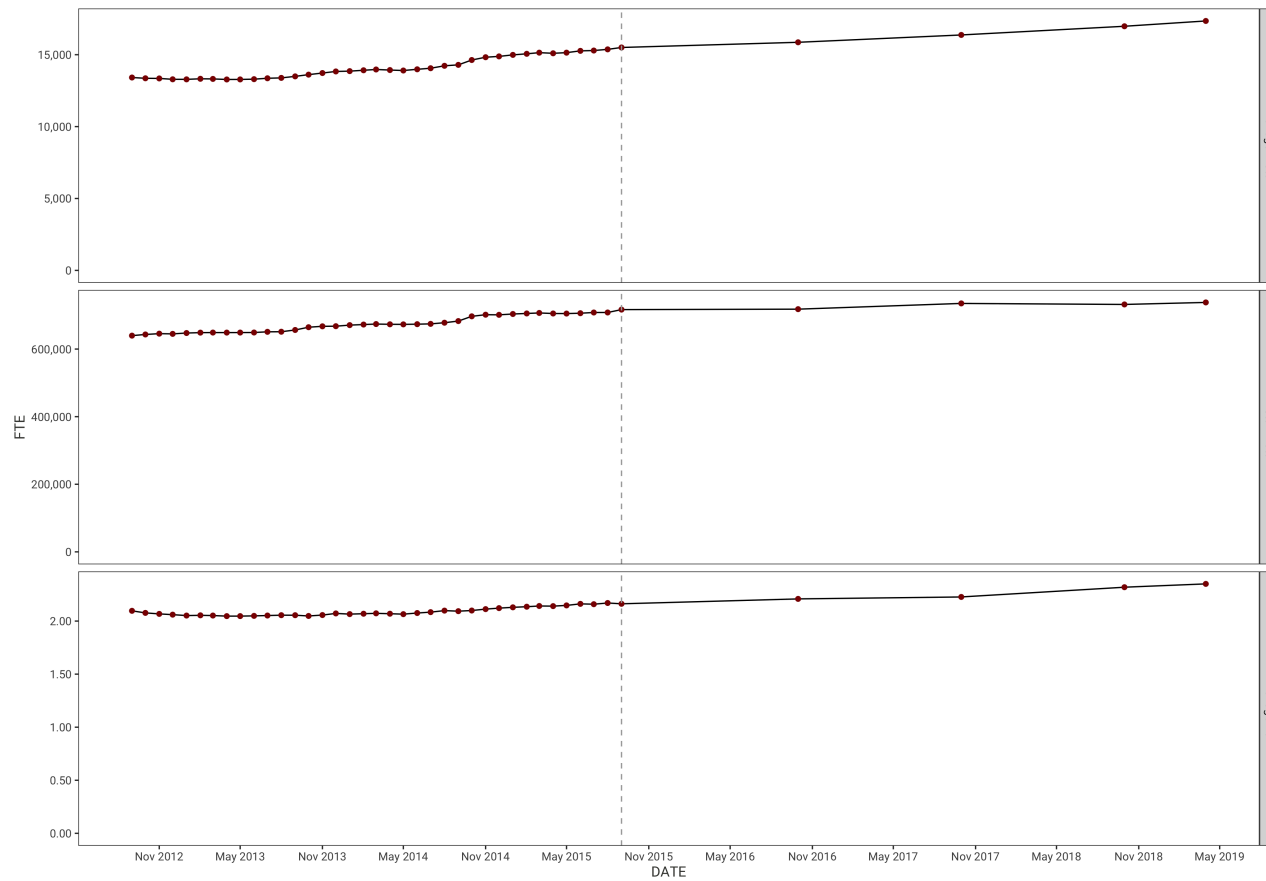

## 2.2 Distribution of management, control and outcome variables

Figure 2: Distribution of key variables across 129 acute NHS hospital trusts in 2016/17

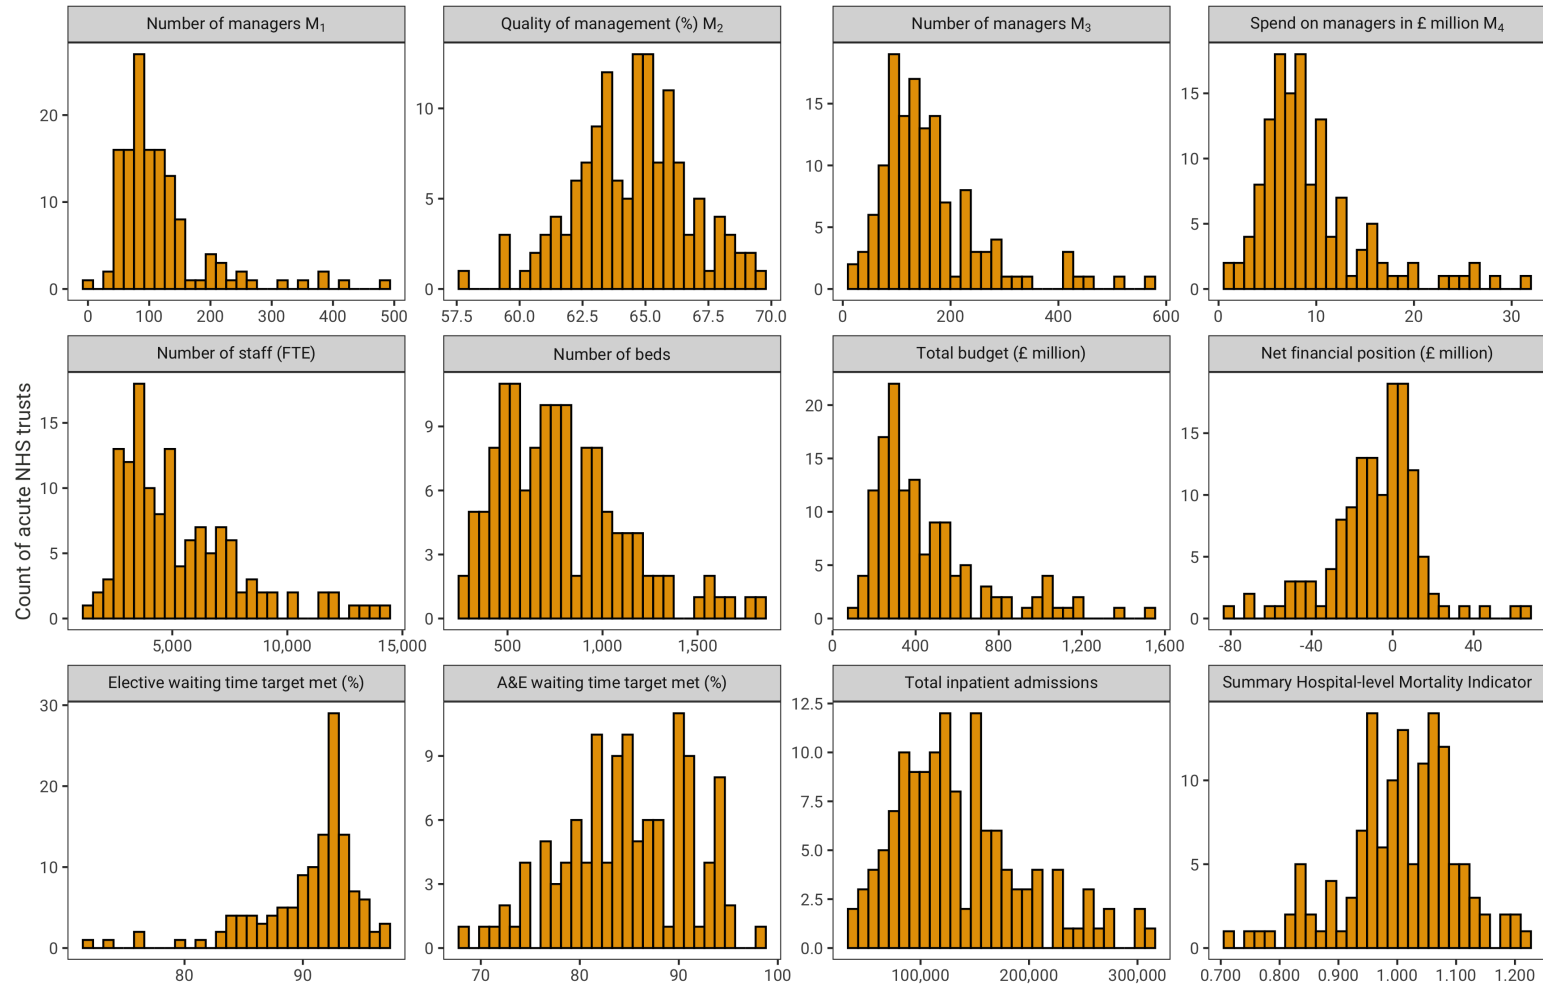

Figure 3: Distribution of key variables across 129 acute NHS hospital trusts in 2017/18

11

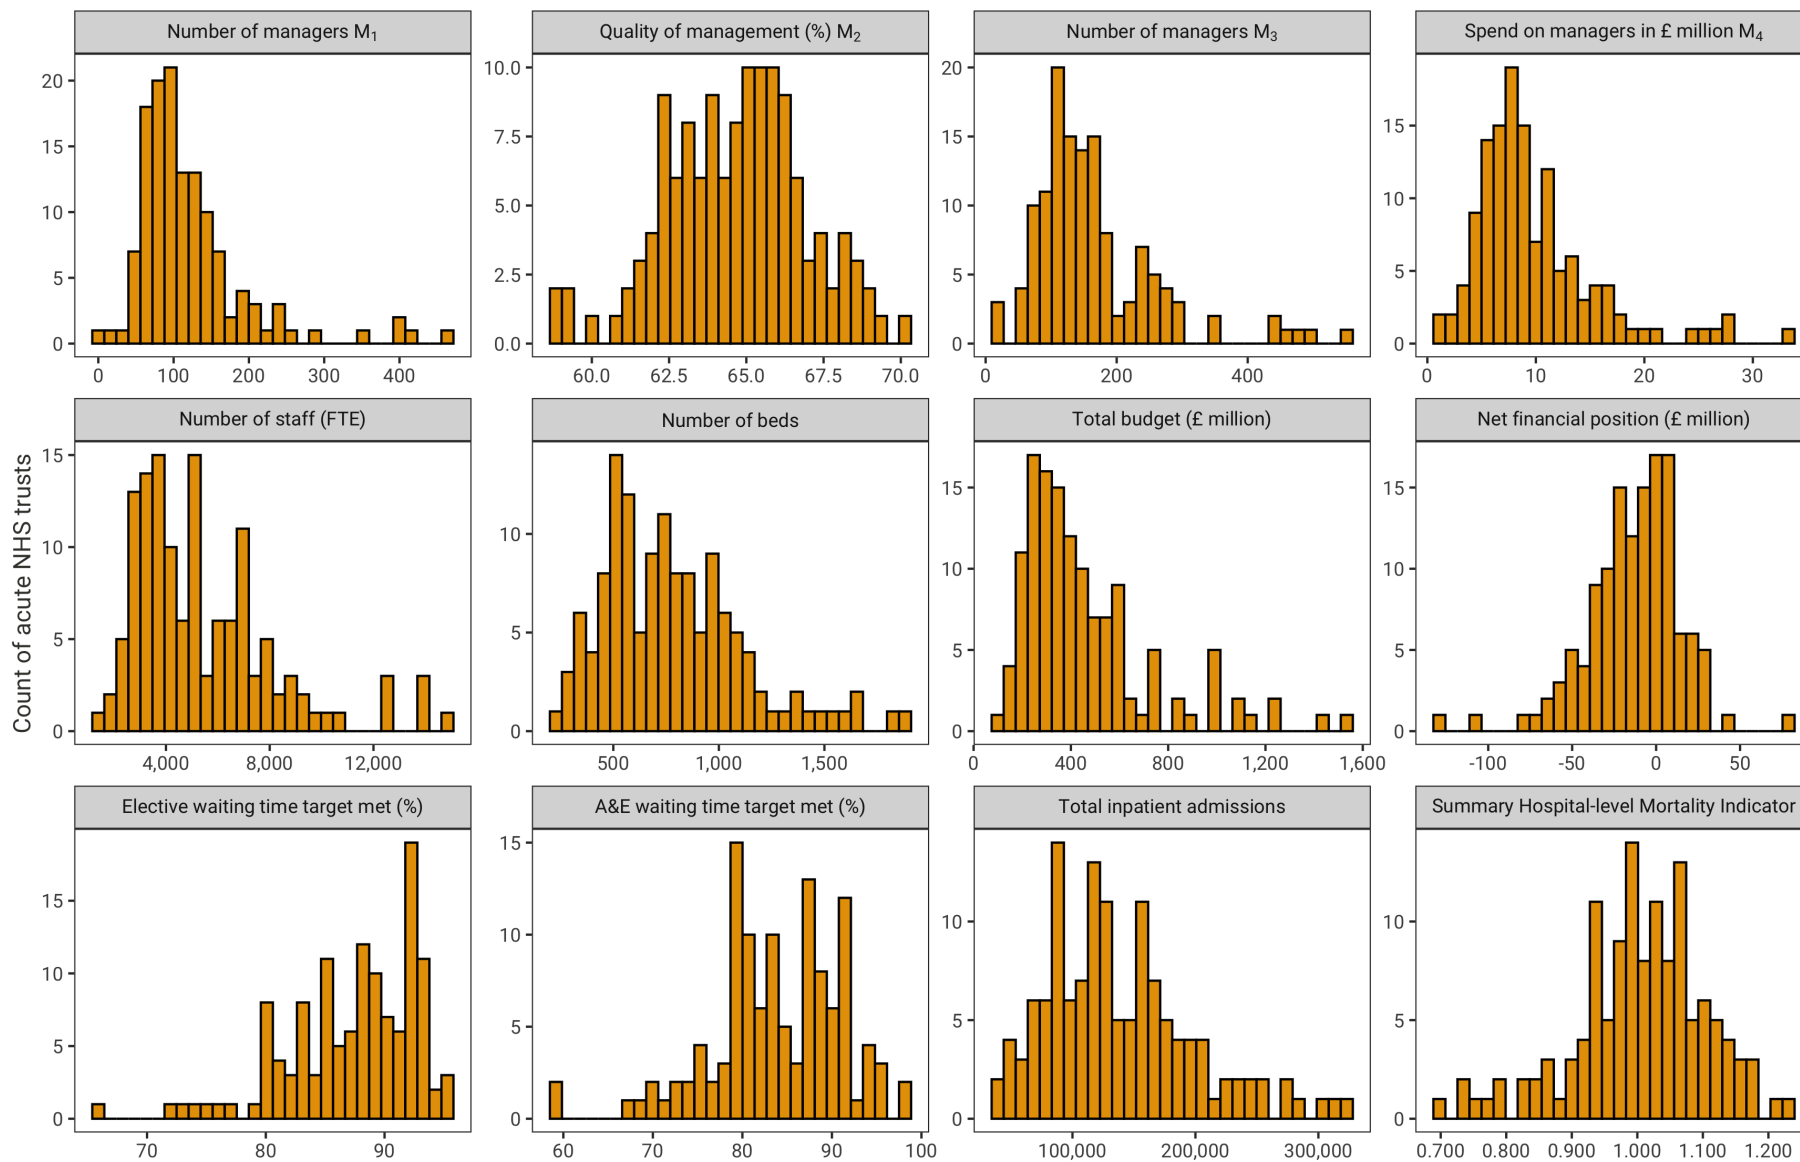

Figure 4: Distribution of key variables across 129 acute NHS hospital trusts in 2018/19

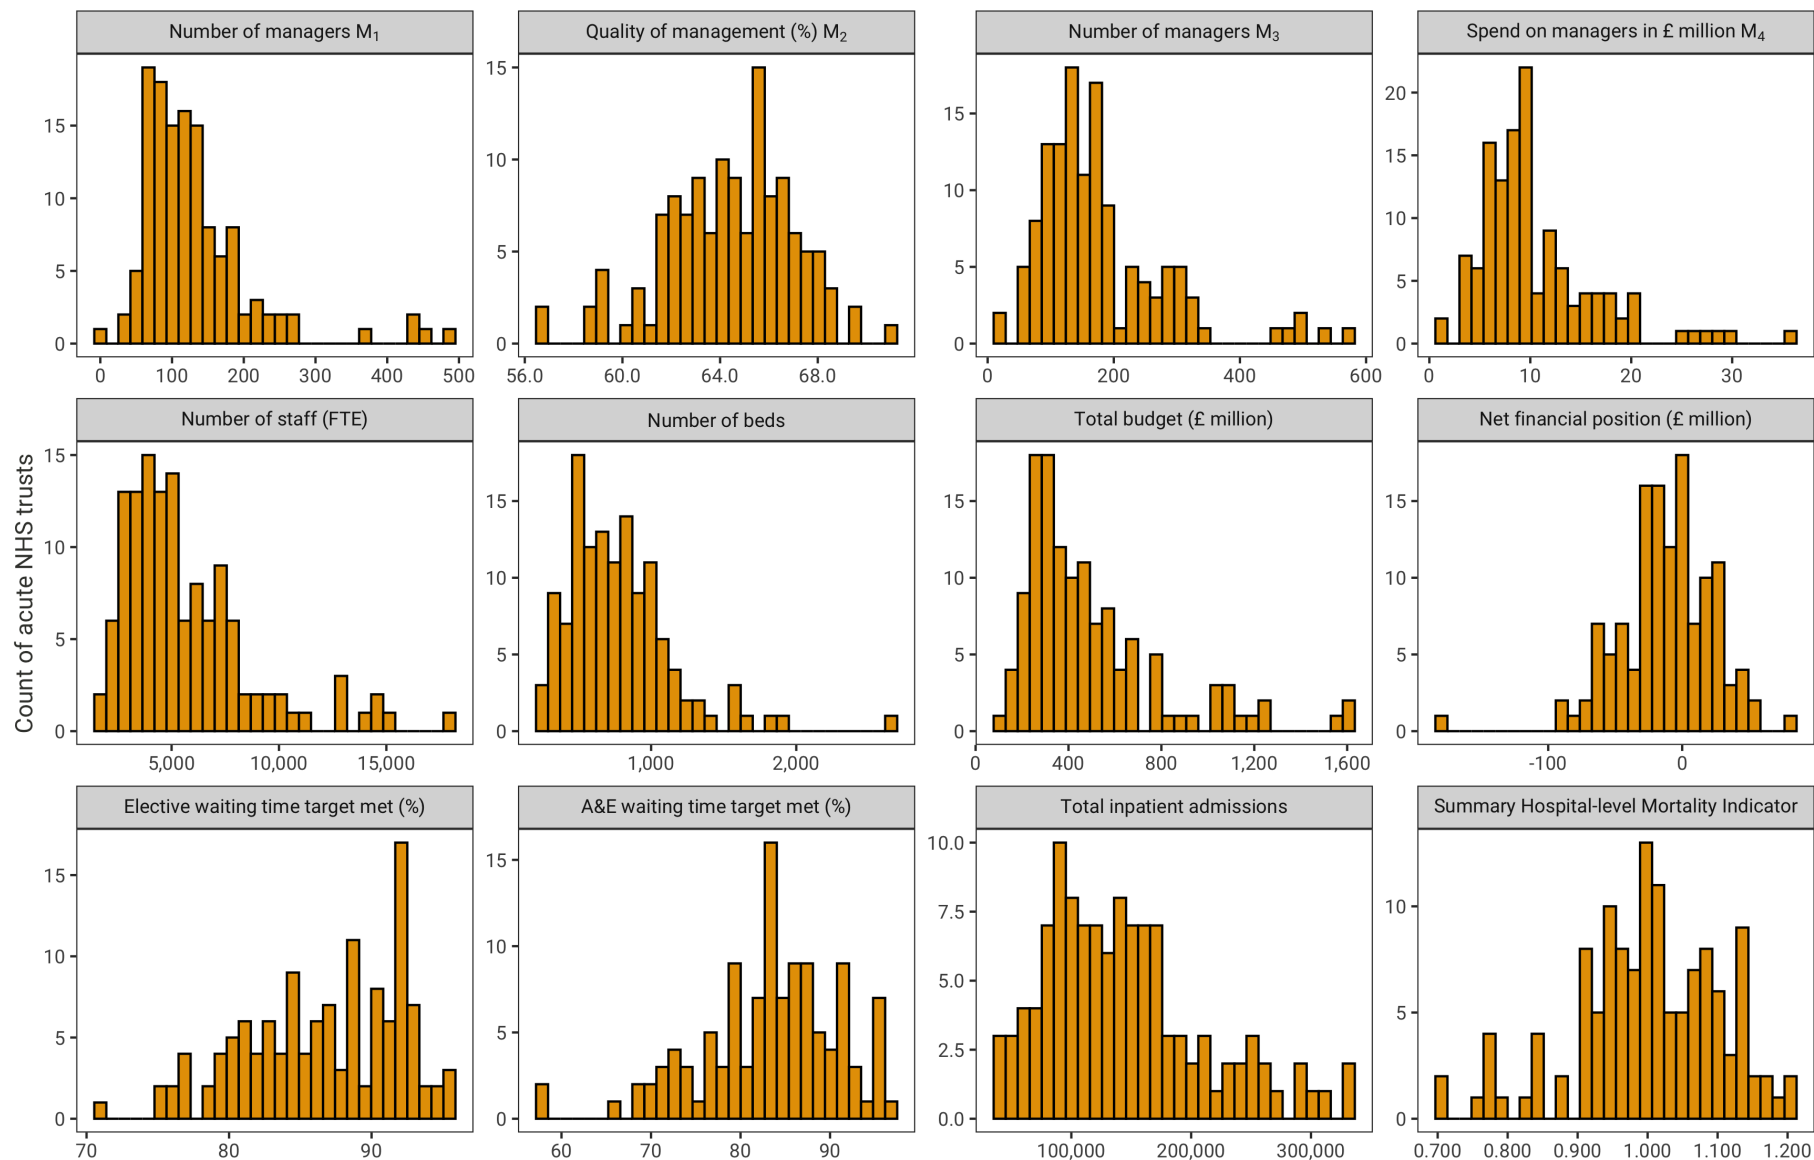

### 2.3 Mediators between management input and outcomes

Figure 5: Relationship between management input (%) and resources to be managed across 129 acute NHS hospital trusts in 2012/13

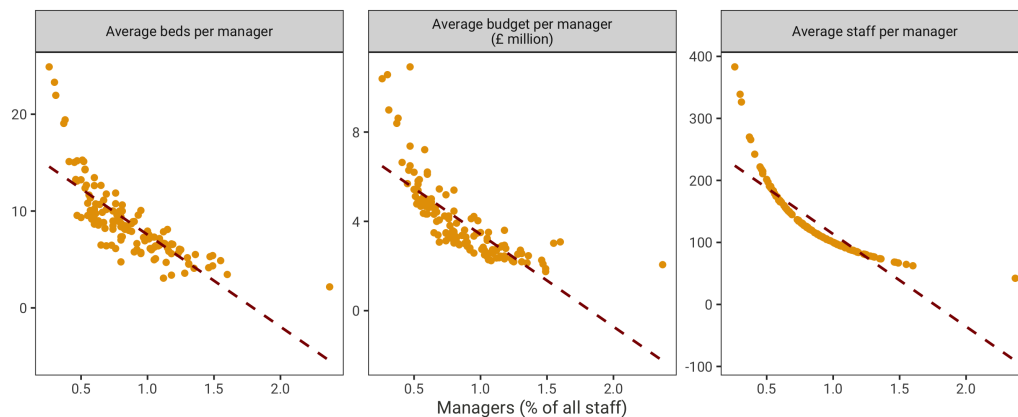

Figure 6: Relationship between management input (%) and resources to be managed across 129 acute NHS hospital trusts in 2013/14

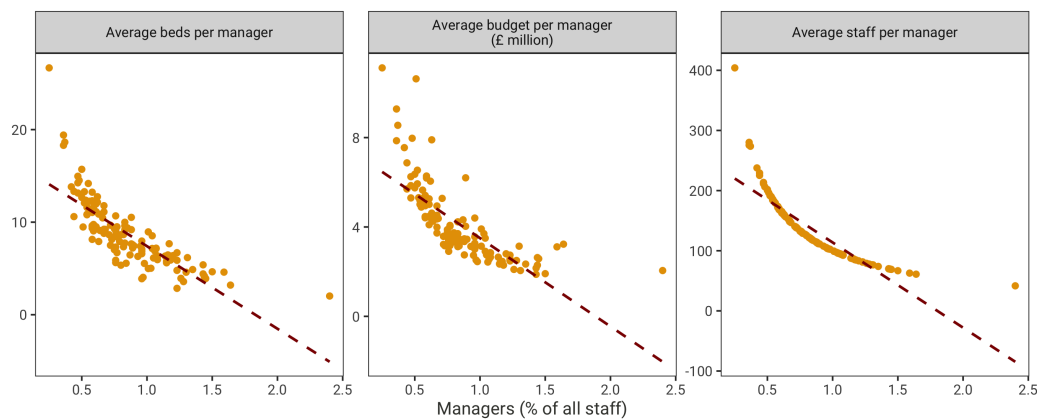

Figure 7: Relationship between management input (%) and resources to be managed across 129 acute NHS hospital trusts in 2014/15

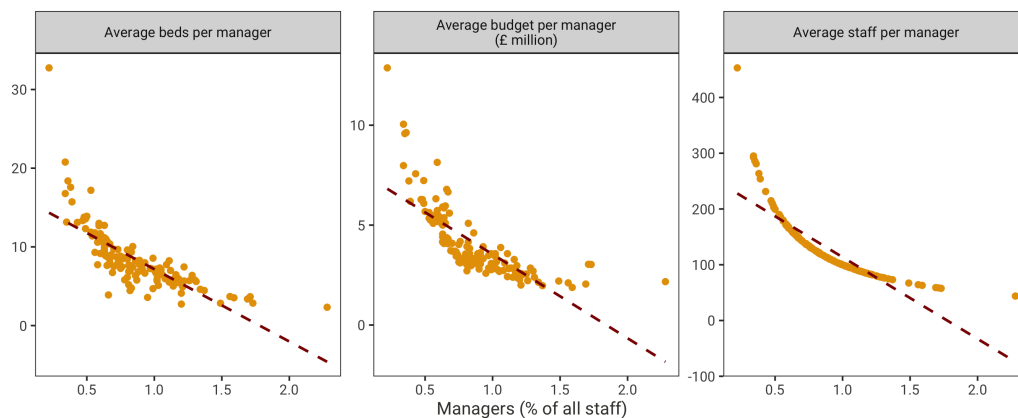

Figure 8: Relationship between management input (%) and resources to be managed across 129 acute NHS hospital trusts in 2015/16

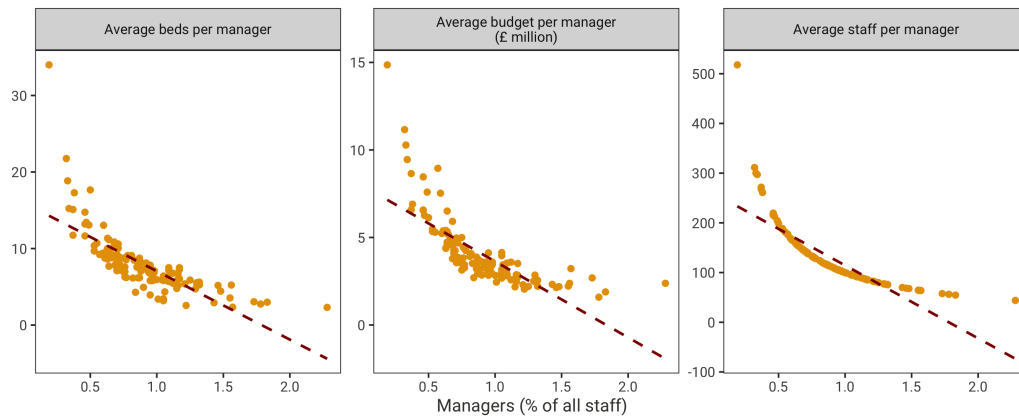

Figure 9: Relationship between management input (%) and resources to be managed across 129 acute NHS hospital trusts in 2016/17

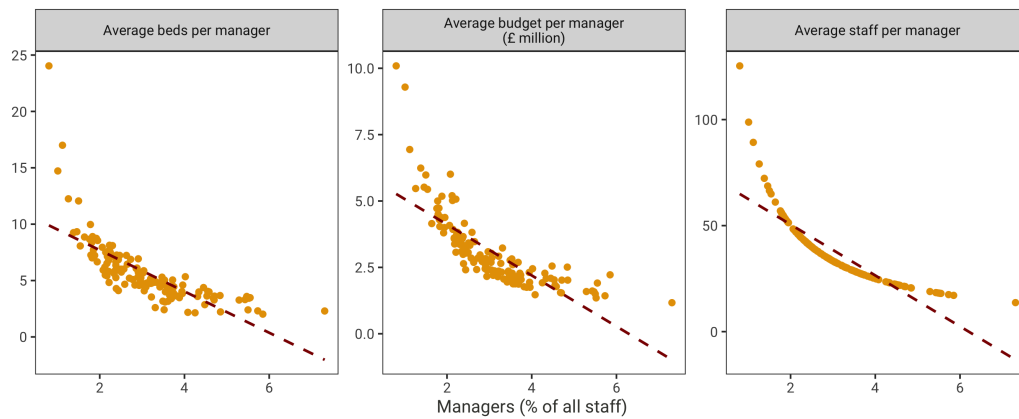

Figure 10: Relationship between management input (%) and resources to be managed across 129 acute NHS hospital trusts in 2017/18

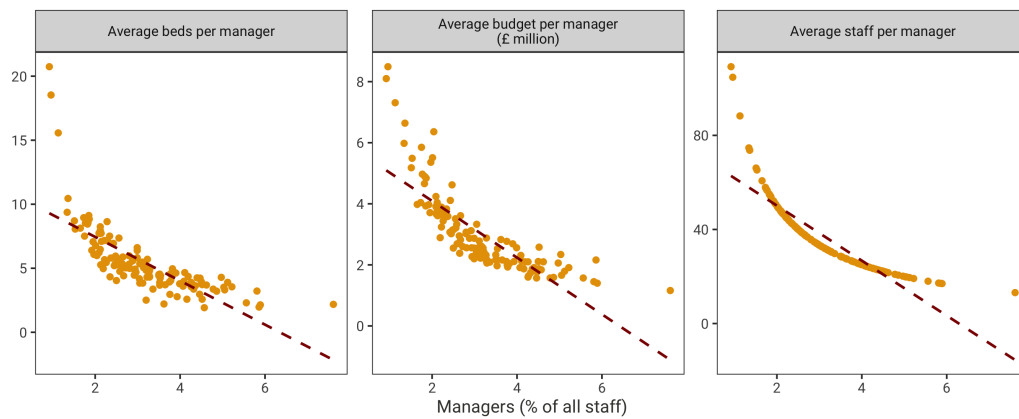

Figure 11: Relationship between management input (%) and resources to be managed across 129 acute NHS hospital trusts in 2018/19

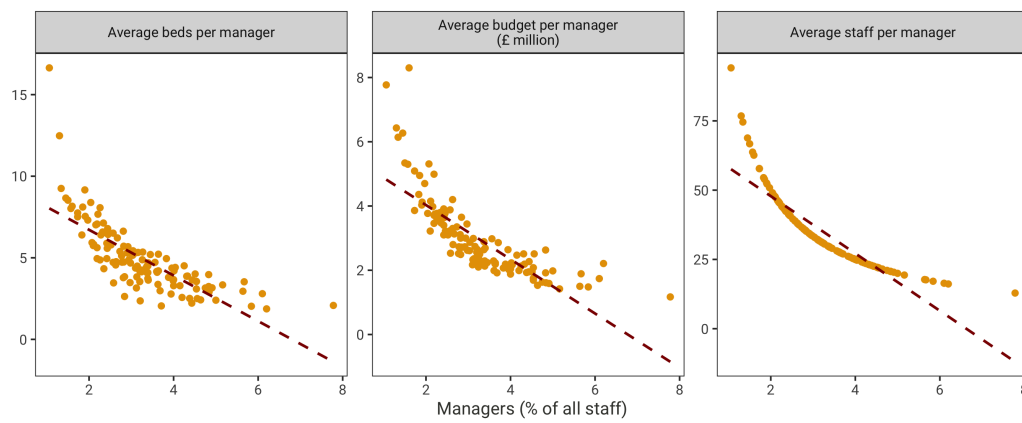

### 3 Examining between and within variation in data

#### 3.1 Comparison of variation in management measures, controls and outcomes between hospitals versus within hospitals over time

Table 4: Overall, between and within variation in management, control and outcome variables 2012/13 – 2018/19

| Variable                                   |         | Mean    | Std. Dev. | Min      | Max      | Observations |
|--------------------------------------------|---------|---------|-----------|----------|----------|--------------|
| Number of managers ( $M_1$ )               | overall | 113.80  | 73.44     | 4        | 492.85   | N = 928      |
|                                            | between |         | 71.48     | 7.29     | 407.60   | n = 134      |
|                                            | within  |         | 21.35     | -33.27   | 234.99   | T-bar = 6.93 |
| Quality of management ( $M_2$ )            | overall | 62.68   | 3.21      | 48.80    | 71       | N = 927      |
|                                            | between |         | 2.08      | 55.27    | 67.59    | n = 134      |
|                                            | within  |         | 2.44      | 53.23    | 68.63    | T-bar = 6.92 |
| Number of managers ( $M_3$ )               | overall | 167.08  | 98.47     | 9.80     | 563.3    | N = 395      |
|                                            | between |         | 100.72    | 10.27    | 562.2    | n = 134      |
|                                            | within  |         | 15.76     | 102.91   | 289.21   | T-bar = 2.95 |
| Spend on managers in £ million ( $M_4$ )   | overall | 9.93    | 5.64      | 1.01     | 35.62    | N = 395      |
|                                            | between |         | 5.75      | 1.11     | 32.45    | n = 134      |
|                                            | within  |         | 0.92      | 6.02     | 16.92    | T-bar = 2.95 |
| Number of staff (FTE)                      | overall | 9397.27 | 5939.77   | 1424     | 35251.25 | N = 923      |
|                                            | between |         | 4604.45   | 2659.53  | 25306.28 | n = 134      |
|                                            | within  |         | 3821.12   | -3648.72 | 19342.24 | T-bar = 6.89 |
| Number of beds                             | overall | 776.98  | 344.79    | 224      | 2658     | N = 926      |
|                                            | between |         | 335.46    | 248.71   | 1894.14  | n = 134      |
|                                            | within  |         | 86.66     | 313.13   | 2163.84  | T-bar = 6.91 |
| Total budget (£ million)                   | overall | 427.46  | 261.87    | 93.53    | 1621.49  | N = 927      |
|                                            | between |         | 255.36    | 106.46   | 1473.48  | n = 134      |
|                                            | within  |         | 64.27     | 37.98    | 1196.07  | T-bar = 6.92 |
| Net financial position (£ million)         | overall | -8.44   | 22.74     | -180.07  | 80.51    | N = 927      |
|                                            | between |         | 16.60     | -73.56   | 33.36    | n = 134      |
|                                            | within  |         | 15.74     | -120.87  | 65.53    | T-bar = 6.92 |
| Elective waiting time target met (%)       | overall | 91.15   | 4.91      | 66.20    | 99.70    | N = 896      |
|                                            | between |         | 2.79      | 83.69    | 96.40    | n = 134      |
|                                            | within  |         | 4.05      | 71.15    | 105.08   | T-bar = 6.69 |
| A&E waiting time target met (%)            | overall | 88.19   | 7.19      | 52       | 100      | N = 823      |
|                                            | between |         | 4.68      | 71       | 97.86    | n = 119      |
|                                            | within  |         | 5.54      | 56.62    | 108.19   | T-bar = 6.92 |
| Total inpatient admissions                 | overall | 130909  | 58086     | 36094    | 332520   | N = 899      |
|                                            | between |         | 56190     | 38731    | 300846   | n = 134      |
|                                            | within  |         | 15352     | 37776    | 247145   | T-bar = 6.71 |
| Summary Hospital-level Mortality Indicator | overall | 1.00    | 0.10      | 0.54     | 1.23     | N = 922      |
|                                            | between |         | 0.09      | 0.68     | 1.160    | n = 134      |
|                                            | within  |         | 0.04      | 0.77     | 1.19     | T-bar = 6.88 |



### 3.2 Exploring the between and within variation in the relationship between management and outcomes

Figure 12: Between variation across 129 acute NHS hospital trusts

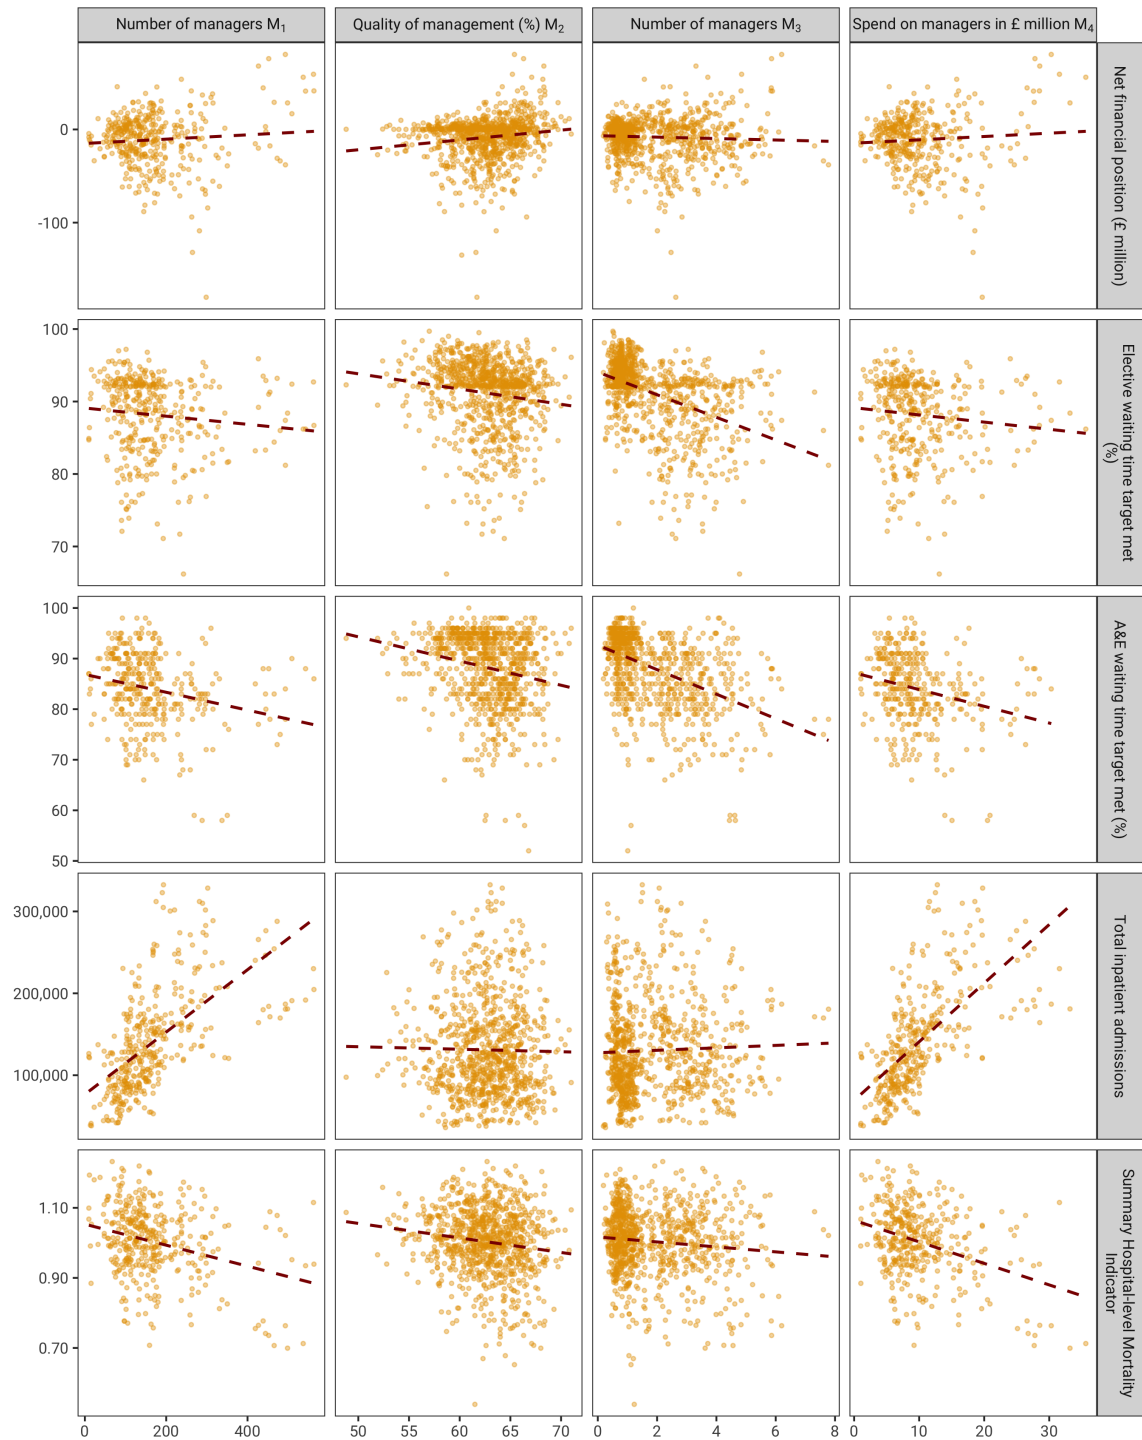

Figure 13: Within variation across 129 acute NHS hospital trusts

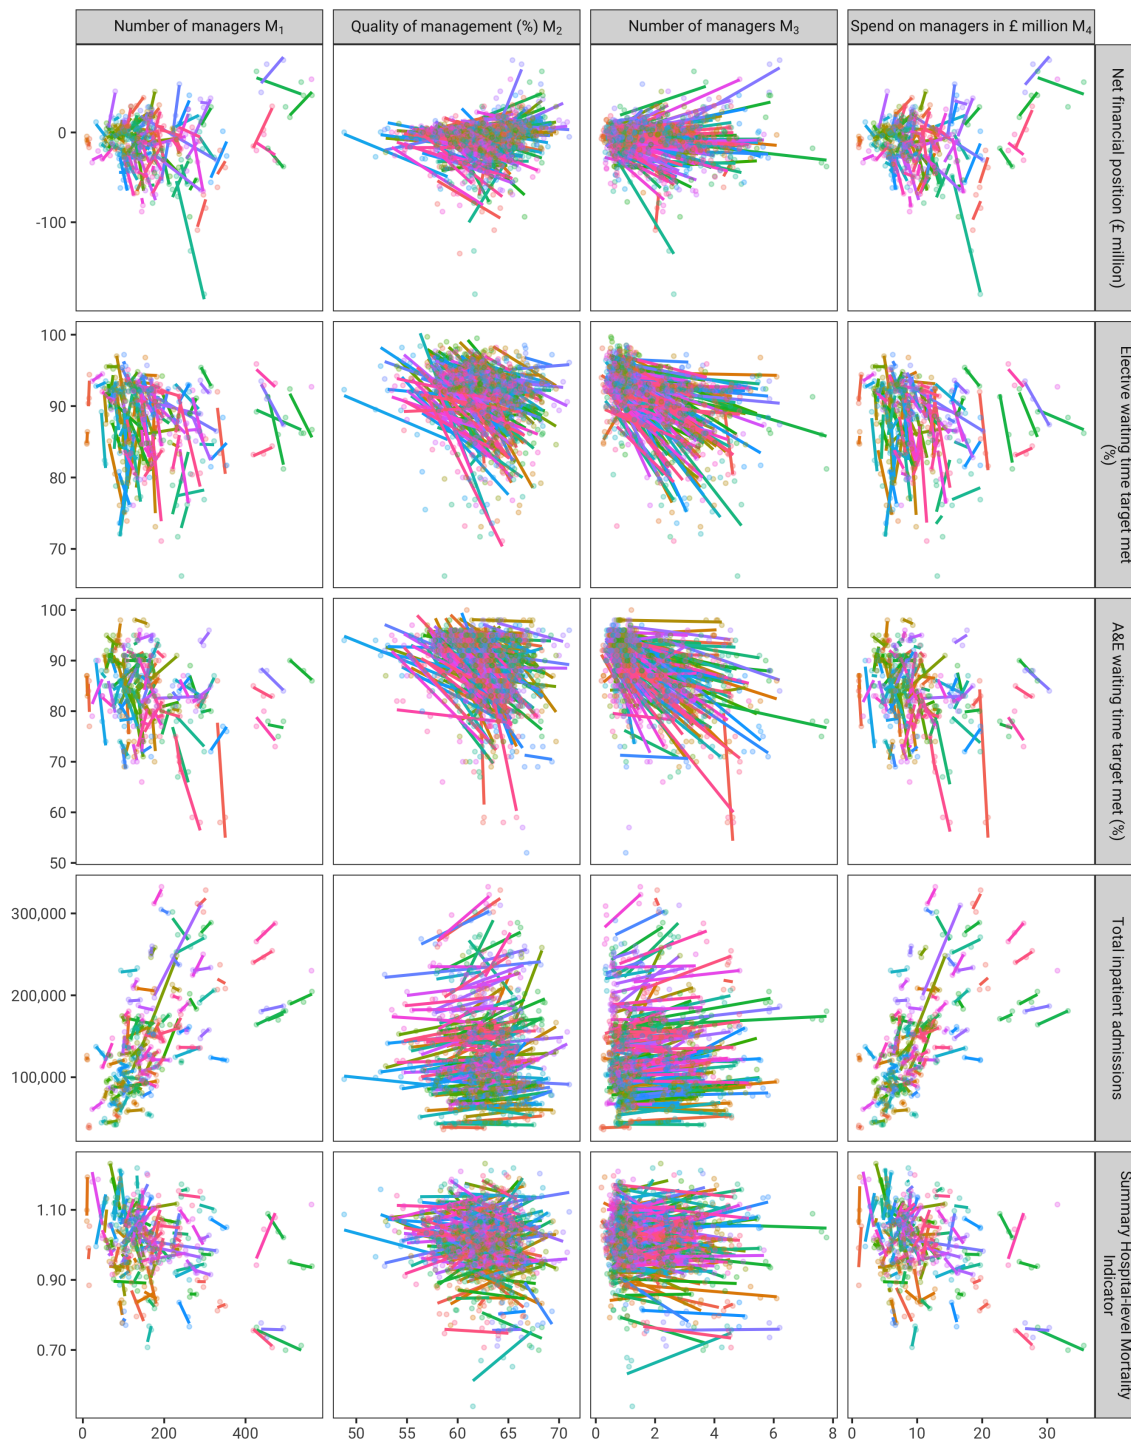

## 4 Alternative specifications of mediation regressions

### 4.1 Number of managers ( $M_1$ )

Table 5: Amount of managerial input and quality of management ( $M_2$ ) 2012/13 – 2018/19

|                              | Quality of management ( $M_2$ ) |                    |                  |                   |                   |                   |                    |                  |                  |                   |
|------------------------------|---------------------------------|--------------------|------------------|-------------------|-------------------|-------------------|--------------------|------------------|------------------|-------------------|
|                              | Pooled<br>(1)                   | Pooled<br>(2)      | Between<br>(3)   | Between<br>(4)    | Within<br>(5)     | Within<br>(6)     | RE<br>(7)          | RE<br>(8)        | Lagged DV<br>(9) | Lagged DV<br>(10) |
| Number of managers ( $M_1$ ) | 0.003<br>(0.002)                | 0.006**<br>(0.003) | 0.003<br>(0.003) | 0.006*<br>(0.004) | -0.005<br>(0.004) | -0.002<br>(0.006) | -0.0005<br>(0.002) | 0.002<br>(0.004) | 0.001<br>(0.001) | 0.002*<br>(0.001) |
| Size and casemix controls    | FALSE                           | TRUE               | FALSE            | TRUE              | FALSE             | TRUE              | FALSE              | TRUE             | FALSE            | TRUE              |
| Observations                 | 927                             | 893                | 134              | 134               | 927               | 893               | 927                | 893              | 792              | 760               |
| R <sup>2</sup>               | 0.356                           | 0.432              | 0.013            | 0.216             | 0.004             | 0.044             | 0.586              | 0.651            | 0.702            | 0.698             |

Note:

\*p<0.1; \*\*p<0.05; \*\*\*p<0.01

Control for number of beds, total budget, number of staff and proportion of admissions by age-sex group

Breusch-Pagan Test - RE vs pooled without controls

p = 0 therefore: RE is preferred to Pooled

Hausman Test - FE vs RE without controls

p = 0.02582 therefore: FE is preferred to RE

Breusch-Pagan Test - RE vs pooled with controls

p = 0 therefore: RE is preferred to Pooled

Hausman Test - FE vs RE with controls

p = 0.08585 therefore: **RE is preferred to FE**

## 4.2 Number of managers ( $M_3$ )

Table 6: Amount of managerial input and quality of management ( $M_2$ ) 2016/17 – 2018/19

|                              | Quality of management ( $M_2$ ) |                   |                  |                   |                   |                  |                  |                  |                  |                    |
|------------------------------|---------------------------------|-------------------|------------------|-------------------|-------------------|------------------|------------------|------------------|------------------|--------------------|
|                              | Pooled                          | Pooled            | Between          | Between           | Within            | Within           | RE               | RE               | Lagged DV        | Lagged DV          |
|                              | (1)                             | (2)               | (3)              | (4)               | (5)               | (6)              | (7)              | (8)              | (9)              | (10)               |
| Number of managers ( $M_3$ ) | 0.003<br>(0.002)                | 0.005*<br>(0.003) | 0.003<br>(0.002) | 0.005*<br>(0.003) | -0.002<br>(0.004) | 0.006<br>(0.005) | 0.002<br>(0.002) | 0.004<br>(0.002) | 0.001<br>(0.001) | -0.0001<br>(0.001) |
| Size and casemix controls    | FALSE                           | TRUE              | FALSE            | TRUE              | FALSE             | TRUE             | FALSE            | TRUE             | FALSE            | TRUE               |
| Observations                 | 395                             | 382               | 134              | 134               | 395               | 382              | 395              | 382              | 394              | 381                |
| R <sup>2</sup>               | 0.014                           | 0.141             | 0.015            | 0.177             | 0.001             | 0.107            | 0.401            | 0.552            | 0.630            | 0.635              |

Note:

\*p<0.1; \*\*p<0.05; \*\*\*p<0.01

Control for number of beds, total budget, number of staff and proportion of admissions by age-sex group

Breusch-Pagan Test - RE vs pooled without controls

p = 0 therefore: RE is preferred to Pooled

Hausman Test - FE vs RE without controls

p = 0 therefore: FE is preferred to RE

Breusch-Pagan Test - RE vs pooled with controls

p = 0 therefore: RE is preferred to Pooled

Hausman Test - FE vs RE with controls

p = 0 therefore: **FE is preferred to RE**

### 4.3 Spend on managers in £ million ( $M_4$ )

Table 7: Amount of managerial input and quality of management ( $M_2$ ) 2016/17 – 2018/19

|                                          | Quality of management ( $M_2$ ) |                    |                  |                   |                   |                  |                  |                  |                  |                   |
|------------------------------------------|---------------------------------|--------------------|------------------|-------------------|-------------------|------------------|------------------|------------------|------------------|-------------------|
|                                          | Pooled                          | Pooled             | Between          | Between           | Within            | Within           | RE               | RE               | Lagged DV        | Lagged DV         |
|                                          | (1)                             | (2)                | (3)              | (4)               | (5)               | (6)              | (7)              | (8)              | (9)              | (10)              |
| Spend on managers in £ million ( $M_4$ ) | 0.046<br>(0.032)                | 0.102**<br>(0.052) | 0.047<br>(0.033) | 0.097*<br>(0.054) | -0.066<br>(0.071) | 0.045<br>(0.087) | 0.026<br>(0.030) | 0.062<br>(0.046) | 0.012<br>(0.012) | 0.0002<br>(0.021) |
| Size and casemix controls                | FALSE                           | TRUE               | FALSE            | TRUE              | FALSE             | TRUE             | FALSE            | TRUE             | FALSE            | TRUE              |
| Observations                             | 395                             | 382                | 134              | 134               | 395               | 382              | 395              | 382              | 394              | 381               |
| R <sup>2</sup>                           | 0.014                           | 0.143              | 0.015            | 0.180             | 0.003             | 0.104            | 0.398            | 0.554            | 0.630            | 0.635             |

Note:

\*p<0.1; \*\*p<0.05; \*\*\*p<0.01

Control for number of beds, total budget, number of staff and proportion of admissions by age-sex group

Breusch-Pagan Test - RE vs pooled without controls

p = 0 therefore: RE is preferred to Pooled

Hausman Test - FE vs RE without controls

p = 0 therefore: FE is preferred to RE

Breusch-Pagan Test - RE vs pooled with controls

p = 0 therefore: RE is preferred to Pooled

Hausman Test - FE vs RE with controls

p = 0 therefore: **FE is preferred to RE**

## 5 Mediation of effect of management quantity on outcomes through NHS staff survey management score

### 5.1 Number of managers ( $M_1$ )

Table 8: Managerial quality and Number of managers ( $M_1$ ) 2012/13 – 2018/19

|                              | Quality of management ( $M_2$ ) |                   |                   |                   |                  |                   |                   |                  |                   |                   |                   |                   |
|------------------------------|---------------------------------|-------------------|-------------------|-------------------|------------------|-------------------|-------------------|------------------|-------------------|-------------------|-------------------|-------------------|
|                              | overall                         | 7a                | 7b                | 7c                | 7d               | 7e                | 7f                | 7g               | 8a                | 8b                | 8c                | 8d                |
|                              | (1)                             | (2)               | (3)               | (4)               | (5)              | (6)               | (7)               | (8)              | (9)               | (10)              | (11)              | (12)              |
| Number of managers ( $M_1$ ) | -0.002<br>(0.006)               | -0.002<br>(0.005) | -0.001<br>(0.005) | -0.001<br>(0.005) | 0.001<br>(0.006) | -0.002<br>(0.004) | 0.0002<br>(0.005) | 0.003<br>(0.004) | 0.0003<br>(0.006) | -0.003<br>(0.008) | -0.001<br>(0.008) | -0.004<br>(0.008) |
| Observations                 | 893                             | 893               | 893               | 893               | 893              | 893               | 513               | 513              | 893               | 893               | 893               | 893               |
| R <sup>2</sup>               | 0.044                           | 0.028             | 0.034             | 0.028             | 0.022            | 0.021             | 0.044             | 0.032            | 0.047             | 0.042             | 0.043             | 0.044             |

*Note:* Control for hospital fixed effects, number of beds, total budget, number of staff and proportion of admissions by age-sex group \*p<0.1; \*\*p<0.05; \*\*\*p<0.01

### 5.2 Number of managers ( $M_3$ )

Table 9: Managerial quality and Number of managers ( $M_3$ ) 2016/17 – 2018/19

|                              | Quality of management ( $M_2$ ) |                  |                  |                   |                  |                  |                   |                  |                   |                  |                  |                  |
|------------------------------|---------------------------------|------------------|------------------|-------------------|------------------|------------------|-------------------|------------------|-------------------|------------------|------------------|------------------|
|                              | overall                         | 7a               | 7b               | 7c                | 7d               | 7e               | 7f                | 7g               | 8a                | 8b               | 8c               | 8d               |
|                              | (1)                             | (2)              | (3)              | (4)               | (5)              | (6)              | (7)               | (8)              | (9)               | (10)             | (11)             | (12)             |
| Number of managers ( $M_3$ ) | 0.006<br>(0.005)                | 0.006<br>(0.006) | 0.003<br>(0.006) | 0.011*<br>(0.006) | 0.005<br>(0.005) | 0.004<br>(0.005) | -0.004<br>(0.006) | 0.003<br>(0.006) | 0.013*<br>(0.007) | 0.008<br>(0.009) | 0.010<br>(0.009) | 0.008<br>(0.010) |
| Observations                 | 382                             | 382              | 382              | 382               | 382              | 382              | 382               | 382              | 382               | 382              | 382              | 382              |
| R <sup>2</sup>               | 0.107                           | 0.073            | 0.088            | 0.118             | 0.102            | 0.104            | 0.081             | 0.080            | 0.096             | 0.078            | 0.070            | 0.091            |

*Note:* Control for hospital fixed effects, number of beds, total budget, number of staff and proportion of admissions by age-sex group \*p<0.1; \*\*p<0.05; \*\*\*p<0.01

### 5.3 Spend on managers in £ million ( $M_4$ )

Table 10: Managerial quality and Spend on managers in £ million ( $M_4$ ) 2016/17 – 2018/19

|                                          | Quality of management ( $M_2$ ) |                  |                   |                  |                  |                  |                   |                   |                  |                  |                  |                  |
|------------------------------------------|---------------------------------|------------------|-------------------|------------------|------------------|------------------|-------------------|-------------------|------------------|------------------|------------------|------------------|
|                                          | overall                         | 7a               | 7b                | 7c               | 7d               | 7e               | 7f                | 7g                | 8a               | 8b               | 8c               | 8d               |
|                                          | (1)                             | (2)              | (3)               | (4)              | (5)              | (6)              | (7)               | (8)               | (9)              | (10)             | (11)             | (12)             |
| Spend on managers in £ million ( $M_4$ ) | 0.045<br>(0.087)                | 0.061<br>(0.103) | -0.008<br>(0.093) | 0.109<br>(0.109) | 0.052<br>(0.083) | 0.001<br>(0.083) | -0.118<br>(0.117) | -0.028<br>(0.094) | 0.190<br>(0.116) | 0.046<br>(0.160) | 0.087<br>(0.149) | 0.082<br>(0.152) |
| Observations                             | 382                             | 382              | 382               | 382              | 382              | 382              | 382               | 382               | 382              | 382              | 382              | 382              |
| R <sup>2</sup>                           | 0.104                           | 0.071            | 0.087             | 0.111            | 0.100            | 0.102            | 0.083             | 0.079             | 0.093            | 0.076            | 0.068            | 0.090            |

*Note:* Control for hospital fixed effects, number of beds, total budget, number of staff and proportion of admissions by age-sex group \*p<0.1; \*\*p<0.05; \*\*\*p<0.01

## 6 Alternative specifications of management regressions

### 6.1 Net financial position (£ million)

#### 6.1.1 Number of managers ( $M_1$ )

Table 11: Amount of managerial input and Net financial position (£ million) 2012/13 – 2018/19

|                              | Net financial position (£ million) |                   |                  |                   |                   |                   |                  |                  |                  |                  |
|------------------------------|------------------------------------|-------------------|------------------|-------------------|-------------------|-------------------|------------------|------------------|------------------|------------------|
|                              | Pooled                             | Pooled            | Between          | Between           | Within            | Within            | RE               | RE               | Lagged DV        | Lagged DV        |
|                              | (1)                                | (2)               | (3)              | (4)               | (5)               | (6)               | (7)              | (8)              | (9)              | (10)             |
| Number of managers ( $M_1$ ) | 0.020<br>(0.027)                   | 0.053*<br>(0.030) | 0.021<br>(0.020) | 0.046*<br>(0.026) | -0.007<br>(0.057) | -0.011<br>(0.047) | 0.012<br>(0.026) | 0.032<br>(0.033) | 0.004<br>(0.010) | 0.017<br>(0.015) |
| Size and casemix controls    | FALSE                              | TRUE              | FALSE            | TRUE              | FALSE             | TRUE              | FALSE            | TRUE             | FALSE            | TRUE             |
| Observations                 | 927                                | 893               | 134              | 134               | 927               | 893               | 927              | 893              | 792              | 760              |
| R <sup>2</sup>               | 0.086                              | 0.166             | 0.008            | 0.360             | 0.0001            | 0.032             | 0.145            | 0.173            | 0.614            | 0.616            |

Note:

\*p<0.1; \*\*p<0.05; \*\*\*p<0.01

Control for number of beds, total budget, number of staff and proportion of admissions by age-sex group

Breusch-Pagan Test - RE vs pooled without controls

p = 0 therefore: RE is preferred to Pooled

Hausman Test - FE vs RE without controls

p = 0.39186 therefore: RE is preferred to FE

Breusch-Pagan Test - RE vs pooled with controls

p = 0 therefore: RE is preferred to Pooled

Hausman Test - FE vs RE with controls

p = 0.0053 therefore: **FE is preferred to RE**

### 6.1.2 Quality of management ( $M_2$ )

Table 12: Amount of managerial input and Net financial position (£ million) 2012/13 – 2018/19

|                                 | Net financial position (£ million) |                     |                     |                     |                  |                  |                     |                     |                     |                     |
|---------------------------------|------------------------------------|---------------------|---------------------|---------------------|------------------|------------------|---------------------|---------------------|---------------------|---------------------|
|                                 | Pooled                             | Pooled              | Between             | Between             | Within           | Within           | RE                  | RE                  | Lagged DV           | Lagged DV           |
|                                 | (1)                                | (2)                 | (3)                 | (4)                 | (5)              | (6)              | (7)                 | (8)                 | (9)                 | (10)                |
| Quality of management ( $M_2$ ) | 3.121***<br>(0.364)                | 2.844***<br>(0.360) | 4.268***<br>(0.585) | 3.751***<br>(0.565) | 0.835<br>(0.561) | 0.433<br>(0.441) | 1.593***<br>(0.433) | 1.209***<br>(0.409) | 1.255***<br>(0.214) | 1.161***<br>(0.214) |
| Size and casemix controls       | FALSE                              | TRUE                | FALSE               | TRUE                | FALSE            | TRUE             | FALSE               | TRUE                | FALSE               | TRUE                |
| Observations                    | 927                                | 893                 | 134                 | 134                 | 927              | 893              | 927                 | 893                 | 792                 | 760                 |
| R <sup>2</sup>                  | 0.208                              | 0.251               | 0.287               | 0.519               | 0.008            | 0.034            | 0.169               | 0.186               | 0.629               | 0.627               |

Note:

\*p<0.1; \*\*p<0.05; \*\*\*p<0.01

Control for number of beds, total budget, number of staff and proportion of admissions by age-sex group

Breusch-Pagan Test - RE vs pooled without controls

p = 0 therefore: RE is preferred to Pooled

Hausman Test - FE vs RE without controls

p = 0 therefore: FE is preferred to RE

Breusch-Pagan Test - RE vs pooled with controls

p = 0 therefore: RE is preferred to Pooled

Hausman Test - FE vs RE with controls

p = 3e-05 therefore: **FE is preferred to RE**



### 6.1.3 Number of managers ( $M_3$ )

Table 13: Amount of managerial input and Net financial position (£ million) 2016/17 – 2018/19

|                              | Net financial position (£ million) |                   |                  |                    |                   |                  |                  |                   |                   |                  |
|------------------------------|------------------------------------|-------------------|------------------|--------------------|-------------------|------------------|------------------|-------------------|-------------------|------------------|
|                              | Pooled                             | Pooled            | Between          | Between            | Within            | Within           | RE               | RE                | Lagged DV         | Lagged DV        |
|                              | (1)                                | (2)               | (3)              | (4)                | (5)               | (6)              | (7)              | (8)               | (9)               | (10)             |
| Number of managers ( $M_3$ ) | 0.024<br>(0.032)                   | 0.062*<br>(0.037) | 0.037<br>(0.023) | 0.066**<br>(0.033) | -0.054<br>(0.088) | 0.124<br>(0.120) | 0.020<br>(0.034) | 0.076*<br>(0.042) | 0.023*<br>(0.013) | 0.023<br>(0.018) |
| Size and casemix controls    | FALSE                              | TRUE              | FALSE            | TRUE               | FALSE             | TRUE             | FALSE            | TRUE              | FALSE             | TRUE             |
| Observations                 | 395                                | 382               | 134              | 134                | 395               | 382              | 395              | 382               | 394               | 381              |
| R <sup>2</sup>               | 0.012                              | 0.166             | 0.020            | 0.207              | 0.004             | 0.062            | 0.018            | 0.073             | 0.645             | 0.659            |

*Note:*

\*p<0.1; \*\*p<0.05; \*\*\*p<0.01

Control for number of beds, total budget, number of staff and proportion of admissions by age-sex group

Breusch-Pagan Test - RE vs pooled without controls

p = 0 therefore: RE is preferred to Pooled

Hausman Test - FE vs RE without controls

p = 0.11259 therefore: RE is preferred to FE

Breusch-Pagan Test - RE vs pooled with controls

p = 0 therefore: RE is preferred to Pooled

Hausman Test - FE vs RE with controls

p = 0.37903 therefore: **RE is preferred to FE**

### 6.1.4 Spend on managers in £ million ( $M_4$ )

Table 14: Amount of managerial input and Net financial position (£ million) 2016/17 – 2018/19

|                                          | Net financial position (£ million) |                   |                  |                    |                   |                  |                  |                   |                   |                  |
|------------------------------------------|------------------------------------|-------------------|------------------|--------------------|-------------------|------------------|------------------|-------------------|-------------------|------------------|
|                                          | Pooled                             | Pooled            | Between          | Between            | Within            | Within           | RE               | RE                | Lagged DV         | Lagged DV        |
|                                          | (1)                                | (2)               | (3)              | (4)                | (5)               | (6)              | (7)              | (8)               | (9)               | (10)             |
| Spend on managers in £ million ( $M_4$ ) | 0.376<br>(0.608)                   | 1.261*<br>(0.753) | 0.599<br>(0.400) | 1.359**<br>(0.638) | -0.916<br>(1.564) | 2.022<br>(2.345) | 0.312<br>(0.634) | 1.474*<br>(0.866) | 0.413*<br>(0.240) | 0.433<br>(0.361) |
| Size and casemix controls                | FALSE                              | TRUE              | FALSE            | TRUE               | FALSE             | TRUE             | FALSE            | TRUE              | FALSE             | TRUE             |
| Observations                             | 395                                | 382               | 134              | 134                | 395               | 382              | 395              | 382               | 394               | 381              |
| R <sup>2</sup>                           | 0.011                              | 0.167             | 0.017            | 0.210              | 0.004             | 0.062            | 0.017            | 0.073             | 0.645             | 0.659            |

Note:

\*p<0.1; \*\*p<0.05; \*\*\*p<0.01

Control for number of beds, total budget, number of staff and proportion of admissions by age-sex group

Breusch-Pagan Test - RE vs pooled without controls

p = 0 therefore: RE is preferred to Pooled

Hausman Test - FE vs RE without controls

p = 0.11944 therefore: RE is preferred to FE

Breusch-Pagan Test - RE vs pooled with controls

p = 0 therefore: RE is preferred to Pooled

Hausman Test - FE vs RE with controls

p = 0.32934 therefore: RE is preferred to FE

## 6.2 Elective waiting time target met (%)

### 6.2.1 Number of managers ( $M_1$ )

Table 15: Amount of managerial input and Elective waiting time target met (%) 2012/13 – 2018/19

|                              | Elective waiting time target met (%) |                  |                    |                    |                  |                  |                   |                  |                   |                  |
|------------------------------|--------------------------------------|------------------|--------------------|--------------------|------------------|------------------|-------------------|------------------|-------------------|------------------|
|                              | Pooled                               | Pooled           | Between            | Between            | Within           | Within           | RE                | RE               | Lagged DV         | Lagged DV        |
|                              | (1)                                  | (2)              | (3)                | (4)                | (5)              | (6)              | (7)               | (8)              | (9)               | (10)             |
| Number of managers ( $M_1$ ) | -0.005<br>(0.003)                    | 0.002<br>(0.005) | -0.006*<br>(0.003) | 0.00000<br>(0.005) | 0.006<br>(0.006) | 0.011<br>(0.007) | -0.003<br>(0.004) | 0.004<br>(0.005) | -0.001<br>(0.002) | 0.002<br>(0.002) |
| Size and casemix controls    | FALSE                                | TRUE             | FALSE              | TRUE               | FALSE            | TRUE             | FALSE             | TRUE             | FALSE             | TRUE             |
| Observations                 | 896                                  | 865              | 134                | 134                | 896              | 865              | 896               | 865              | 744               | 715              |
| R <sup>2</sup>               | 0.361                                | 0.402            | 0.022              | 0.280              | 0.002            | 0.021            | 0.543             | 0.598            | 0.635             | 0.642            |

Note:

\*p<0.1; \*\*p<0.05; \*\*\*p<0.01

Control for number of beds, total budget, number of staff and proportion of admissions by age-sex group

Breusch-Pagan Test - RE vs pooled without controls

p = 0 therefore: RE is preferred to Pooled

Hausman Test - FE vs RE without controls

p = 0 therefore: FE is preferred to RE

Breusch-Pagan Test - RE vs pooled with controls

p = 0 therefore: RE is preferred to Pooled

Hausman Test - FE vs RE with controls

p = 0 therefore: **FE is preferred to RE**

## 6.2.2 Quality of management ( $M_2$ )

Table 16: Amount of managerial input and Elective waiting time target met (%) 2012/13 – 2018/19

|                                 | Elective waiting time target met (%) |                     |                     |                     |                  |                   |                    |                   |                     |                     |
|---------------------------------|--------------------------------------|---------------------|---------------------|---------------------|------------------|-------------------|--------------------|-------------------|---------------------|---------------------|
|                                 | Pooled                               | Pooled              | Between             | Between             | Within           | Within            | RE                 | RE                | Lagged DV           | Lagged DV           |
|                                 | (1)                                  | (2)                 | (3)                 | (4)                 | (5)              | (6)               | (7)                | (8)               | (9)                 | (10)                |
| Quality of management ( $M_2$ ) | 0.405***<br>(0.071)                  | 0.352***<br>(0.073) | 0.592***<br>(0.104) | 0.547***<br>(0.105) | 0.024<br>(0.097) | -0.020<br>(0.093) | 0.180**<br>(0.078) | 0.130*<br>(0.076) | 0.194***<br>(0.045) | 0.182***<br>(0.049) |
| Size and casemix controls       | FALSE                                | TRUE                | FALSE               | TRUE                | FALSE            | TRUE              | FALSE              | TRUE              | FALSE               | TRUE                |
| Observations                    | 896                                  | 865                 | 134                 | 134                 | 896              | 865               | 896                | 865               | 744                 | 715                 |
| R <sup>2</sup>                  | 0.400                                | 0.432               | 0.196               | 0.411               | 0.0002           | 0.018             | 0.546              | 0.599             | 0.644               | 0.649               |

Note:

\*p<0.1; \*\*p<0.05; \*\*\*p<0.01

Control for number of beds, total budget, number of staff and proportion of admissions by age-sex group

Breusch-Pagan Test - RE vs pooled without controls

p = 0 therefore: RE is preferred to Pooled

Hausman Test - FE vs RE without controls

p = 0 therefore: FE is preferred to RE

Breusch-Pagan Test - RE vs pooled with controls

p = 0 therefore: RE is preferred to Pooled

Hausman Test - FE vs RE with controls

p = 0 therefore: **FE is preferred to RE**

### 6.2.3 Number of managers ( $M_3$ )

Table 17: Amount of managerial input and Elective waiting time target met (%) 2016/17 – 2018/19

|                              | Elective waiting time target met (%) |                   |                   |                   |                  |                  |                   |                   |                    |                   |
|------------------------------|--------------------------------------|-------------------|-------------------|-------------------|------------------|------------------|-------------------|-------------------|--------------------|-------------------|
|                              | Pooled                               | Pooled            | Between           | Between           | Within           | Within           | RE                | RE                | Lagged DV          | Lagged DV         |
|                              | (1)                                  | (2)               | (3)               | (4)               | (5)              | (6)              | (7)               | (8)               | (9)                | (10)              |
| Number of managers ( $M_3$ ) | -0.005<br>(0.004)                    | -0.003<br>(0.005) | -0.004<br>(0.004) | -0.003<br>(0.006) | 0.003<br>(0.011) | 0.013<br>(0.017) | -0.003<br>(0.003) | -0.003<br>(0.005) | -0.003*<br>(0.001) | -0.004<br>(0.003) |
| Size and casemix controls    | FALSE                                | TRUE              | FALSE             | TRUE              | FALSE            | TRUE             | FALSE             | TRUE              | FALSE              | TRUE              |
| Observations                 | 384                                  | 371               | 134               | 134               | 384              | 371              | 384               | 371               | 373                | 360               |
| R <sup>2</sup>               | 0.107                                | 0.234             | 0.007             | 0.180             | 0.0004           | 0.067            | 0.515             | 0.596             | 0.613              | 0.635             |

Note:

\*p<0.1; \*\*p<0.05; \*\*\*p<0.01

Control for number of beds, total budget, number of staff and proportion of admissions by age-sex group

Breusch-Pagan Test - RE vs pooled without controls

p = 0 therefore: RE is preferred to Pooled

Hausman Test - FE vs RE without controls

p = 0.34332 therefore: RE is preferred to FE

Breusch-Pagan Test - RE vs pooled with controls

p = 0 therefore: RE is preferred to Pooled

Hausman Test - FE vs RE with controls

p = 0.00416 therefore: **FE is preferred to RE**

### 6.2.4 Spend on managers in £ million ( $M_4$ )

Table 18: Amount of managerial input and Elective waiting time target met (%) 2016/17 – 2018/19

|                                          | Elective waiting time target met (%) |                   |                   |                   |                  |                  |                   |                   |           |           |                   |
|------------------------------------------|--------------------------------------|-------------------|-------------------|-------------------|------------------|------------------|-------------------|-------------------|-----------|-----------|-------------------|
|                                          | Pooled                               | Pooled            | Between           | Between           | Within           | Within           | RE                | RE                | Lagged DV | Lagged DV |                   |
|                                          | (1)                                  | (2)               | (3)               | (4)               | (5)              | (6)              | (7)               | (8)               | (9)       | (10)      |                   |
| Spend on managers in £ million ( $M_4$ ) | -0.079<br>(0.063)                    | -0.077<br>(0.112) | -0.068<br>(0.069) | -0.064<br>(0.112) | 0.098<br>(0.188) | 0.317<br>(0.275) | -0.051<br>(0.055) | -0.043<br>(0.106) | -0.042*   | (0.025)   | -0.083<br>(0.051) |
| Size and casemix controls                | FALSE                                | TRUE              | FALSE             | TRUE              | FALSE            | TRUE             | FALSE             | TRUE              | FALSE     | TRUE      |                   |
| Observations                             | 384                                  | 371               | 134               | 134               | 384              | 371              | 384               | 371               | 373       | 360       |                   |
| R <sup>2</sup>                           | 0.107                                | 0.234             | 0.007             | 0.181             | 0.001            | 0.069            | 0.515             | 0.595             | 0.612     | 0.635     |                   |

Note:

\*p<0.1; \*\*p<0.05; \*\*\*p<0.01

Control for number of beds, total budget, number of staff and proportion of admissions by age-sex group

Breusch-Pagan Test - RE vs pooled without controls

p = 0 therefore: RE is preferred to Pooled

Hausman Test - FE vs RE without controls

p = 0.34516 therefore: RE is preferred to FE

Breusch-Pagan Test - RE vs pooled with controls

p = 0 therefore: RE is preferred to Pooled

Hausman Test - FE vs RE with controls

p = 0.00483 therefore: **FE is preferred to RE**

### 6.3 A&E waiting time target met (%)

#### 6.3.1 Number of managers ( $M_1$ )

Table 19: Amount of managerial input and A&E waiting time target met (%) 2012/13 – 2018/19

|                              | A&E waiting time target met (%) |         |         |         |         |         |          |         |           |           |
|------------------------------|---------------------------------|---------|---------|---------|---------|---------|----------|---------|-----------|-----------|
|                              | Pooled                          | Pooled  | Between | Between | Within  | Within  | RE       | RE      | Lagged DV | Lagged DV |
|                              | (1)                             | (2)     | (3)     | (4)     | (5)     | (6)     | (7)      | (8)     | (9)       | (10)      |
| Number of managers ( $M_1$ ) | -0.010*                         | -0.006  | -0.012* | -0.006  | -0.013  | -0.016  | -0.012** | -0.010  | -0.004    | -0.002    |
|                              | (0.005)                         | (0.006) | (0.006) | (0.010) | (0.010) | (0.010) | (0.005)  | (0.007) | (0.002)   | (0.003)   |
| Size and casemix controls    | FALSE                           | TRUE    | FALSE   | TRUE    | FALSE   | TRUE    | FALSE    | TRUE    | FALSE     | TRUE      |
| Observations                 | 823                             | 817     | 119     | 119     | 823     | 817     | 823      | 817     | 701       | 697       |
| R <sup>2</sup>               | 0.323                           | 0.363   | 0.029   | 0.225   | 0.004   | 0.034   | 0.485    | 0.499   | 0.646     | 0.654     |

Note:

\*p<0.1; \*\*p<0.05; \*\*\*p<0.01

Control for number of beds, total budget, number of staff and proportion of admissions by age-sex group

Breusch-Pagan Test - RE vs pooled without controls

p = 0 therefore: RE is preferred to Pooled

Hausman Test - FE vs RE without controls

p = 0.84398 therefore: RE is preferred to FE

Breusch-Pagan Test - RE vs pooled with controls

p = 0 therefore: RE is preferred to Pooled

Hausman Test - FE vs RE with controls

p = 0 therefore: **FE is preferred to RE**

### 6.3.2 Quality of management ( $M_2$ )

Table 20: Amount of managerial input and A&E waiting time target met (%) 2012/13 – 2018/19

|                                 | A&E waiting time target met (%) |                     |                    |                     |                  |                  |                    |                    |                  |                    |
|---------------------------------|---------------------------------|---------------------|--------------------|---------------------|------------------|------------------|--------------------|--------------------|------------------|--------------------|
|                                 | Pooled                          | Pooled              | Between            | Between             | Within           | Within           | RE                 | RE                 | Lagged DV        | Lagged DV          |
|                                 | (1)                             | (2)                 | (3)                | (4)                 | (5)              | (6)              | (7)                | (8)                | (9)              | (10)               |
| Quality of management ( $M_2$ ) | 0.376**<br>(0.166)              | 0.456***<br>(0.118) | 0.500**<br>(0.208) | 0.771***<br>(0.214) | 0.110<br>(0.102) | 0.122<br>(0.107) | 0.187**<br>(0.093) | 0.189**<br>(0.087) | 0.101<br>(0.074) | 0.144**<br>(0.067) |
| Size and casemix controls       | FALSE                           | TRUE                | FALSE              | TRUE                | FALSE            | TRUE             | FALSE              | TRUE               | FALSE            | TRUE               |
| Observations                    | 823                             | 817                 | 119                | 119                 | 823              | 817              | 823                | 817                | 701              | 697                |
| R <sup>2</sup>                  | 0.330                           | 0.385               | 0.047              | 0.307               | 0.002            | 0.033            | 0.485              | 0.500              | 0.646            | 0.656              |

Note:

\*p<0.1; \*\*p<0.05; \*\*\*p<0.01

Control for number of beds, total budget, number of staff and proportion of admissions by age-sex group

Breusch-Pagan Test - RE vs pooled without controls

p = 0 therefore: RE is preferred to Pooled

Hausman Test - FE vs RE without controls

p = 0.05094 therefore: RE is preferred to FE

Breusch-Pagan Test - RE vs pooled with controls

p = 0 therefore: RE is preferred to Pooled

Hausman Test - FE vs RE with controls

p = 0 therefore: **FE is preferred to RE**



### 6.3.3 Number of managers ( $M_3$ )

Table 21: Amount of managerial input and A&E waiting time target met (%) 2016/17 – 2018/19

|                              | A&E waiting time target met (%) |                    |                      |                     |                  |                   |                     |                   |                   |                   |
|------------------------------|---------------------------------|--------------------|----------------------|---------------------|------------------|-------------------|---------------------|-------------------|-------------------|-------------------|
|                              | Pooled                          | Pooled             | Between              | Between             | Within           | Within            | RE                  | RE                | Lagged DV         | Lagged DV         |
|                              | (1)                             | (2)                | (3)                  | (4)                 | (5)              | (6)               | (7)                 | (8)               | (9)               | (10)              |
| Number of managers ( $M_3$ ) | -0.017***<br>(0.007)            | -0.017*<br>(0.009) | -0.018***<br>(0.006) | -0.019**<br>(0.009) | 0.004<br>(0.018) | -0.023<br>(0.024) | -0.014**<br>(0.006) | -0.015<br>(0.009) | -0.004<br>(0.003) | -0.004<br>(0.003) |
| Size and casemix controls    | FALSE                           | TRUE               | FALSE                | TRUE                | FALSE            | TRUE              | FALSE               | TRUE              | FALSE             | TRUE              |
| Observations                 | 353                             | 353                | 119                  | 119                 | 353              | 353               | 353                 | 353               | 352               | 352               |
| R <sup>2</sup>               | 0.062                           | 0.128              | 0.066                | 0.150               | 0.0003           | 0.054             | 0.147               | 0.186             | 0.678             | 0.690             |

Note:

\*p<0.1; \*\*p<0.05; \*\*\*p<0.01

Control for number of beds, total budget, number of staff and proportion of admissions by age-sex group

Breusch-Pagan Test - RE vs pooled without controls

p = 0 therefore: RE is preferred to Pooled

Hausman Test - FE vs RE without controls

p = 0 therefore: FE is preferred to RE

Breusch-Pagan Test - RE vs pooled with controls

p = 0 therefore: RE is preferred to Pooled

Hausman Test - FE vs RE with controls

p = 0.00767 therefore: **FE is preferred to RE**

### 6.3.4 Spend on managers in £ million ( $M_4$ )

Table 22: Amount of managerial input and A&E waiting time target met (%) 2016/17 – 2018/19

|                                          | A&E waiting time target met (%) |                     |                      |                     |                   |                   |                     |                    |                   |                   |
|------------------------------------------|---------------------------------|---------------------|----------------------|---------------------|-------------------|-------------------|---------------------|--------------------|-------------------|-------------------|
|                                          | Pooled                          | Pooled              | Between              | Between             | Within            | Within            | RE                  | RE                 | Lagged DV         | Lagged DV         |
|                                          | (1)                             | (2)                 | (3)                  | (4)                 | (5)               | (6)               | (7)                 | (8)                | (9)               | (10)              |
| Spend on managers in £ million ( $M_4$ ) | -0.323***<br>(0.113)            | -0.359**<br>(0.181) | -0.334***<br>(0.111) | -0.399**<br>(0.181) | -0.042<br>(0.322) | -0.604<br>(0.417) | -0.286**<br>(0.112) | -0.352*<br>(0.180) | -0.077<br>(0.050) | -0.093<br>(0.071) |
| Size and casemix controls                | FALSE                           | TRUE                | FALSE                | TRUE                | FALSE             | TRUE              | FALSE               | TRUE               | FALSE             | TRUE              |
| Observations                             | 353                             | 353                 | 119                  | 119                 | 353               | 353               | 353                 | 353                | 352               | 352               |
| R <sup>2</sup>                           | 0.068                           | 0.132               | 0.072                | 0.155               | 0.0001            | 0.062             | 0.152               | 0.188              | 0.679             | 0.691             |

Note:

\*p<0.1; \*\*p<0.05; \*\*\*p<0.01

Control for number of beds, total budget, number of staff and proportion of admissions by age-sex group

34

Breusch-Pagan Test - RE vs pooled without controls

p = 0 therefore: RE is preferred to Pooled

Hausman Test - FE vs RE without controls

p = 0 therefore: FE is preferred to RE

Breusch-Pagan Test - RE vs pooled with controls

p = 0 therefore: RE is preferred to Pooled

Hausman Test - FE vs RE with controls

p = 0.00321 therefore: **FE is preferred to RE**

## 6.4 Total inpatient admissions

### 6.4.1 Number of managers ( $M_1$ )

Table 23: Amount of managerial input and Total inpatient admissions 2012/13 – 2018/19

|                              | Total inpatient admissions |                   |                        |                   |                        |                    |                        |                    |                      |                  |
|------------------------------|----------------------------|-------------------|------------------------|-------------------|------------------------|--------------------|------------------------|--------------------|----------------------|------------------|
|                              | Pooled                     | Pooled            | Between                | Between           | Within                 | Within             | RE                     | RE                 | Lagged DV            | Lagged DV        |
|                              | (1)                        | (2)               | (3)                    | (4)               | (5)                    | (6)                | (7)                    | (8)                | (9)                  | (10)             |
| Number of managers ( $M_1$ ) | 465.793***<br>(64.305)     | 7.290<br>(40.084) | 467.450***<br>(55.357) | 9.781<br>(33.194) | 205.396***<br>(64.956) | 16.981<br>(30.135) | 243.579***<br>(57.095) | 12.405<br>(27.222) | 21.840***<br>(7.151) | 4.719<br>(8.338) |
| Size and casemix controls    | FALSE                      | TRUE              | FALSE                  | TRUE              | FALSE                  | TRUE               | FALSE                  | TRUE               | FALSE                | TRUE             |
| Observations                 | 899                        | 893               | 134                    | 134               | 899                    | 893                | 899                    | 893                | 749                  | 745              |
| R <sup>2</sup>               | 0.351                      | 0.885             | 0.351                  | 0.913             | 0.084                  | 0.606              | 0.371                  | 0.745              | 0.965                | 0.968            |

Note:

\*p<0.1; \*\*p<0.05; \*\*\*p<0.01

Control for number of beds, total budget, number of staff and proportion of admissions by age-sex group

Breusch-Pagan Test - RE vs pooled without controls

p = 0 therefore: RE is preferred to Pooled

Hausman Test - FE vs RE without controls

p = 6e-05 therefore: FE is preferred to RE

Breusch-Pagan Test - RE vs pooled with controls

p = 0 therefore: RE is preferred to Pooled

Hausman Test - FE vs RE with controls

p = 0 therefore: **FE is preferred to RE**

### 6.4.2 Quality of management ( $M_2$ )

Table 24: Amount of managerial input and Total inpatient admissions 2012/13 – 2018/19

|                                 | Total inpatient admissions  |                       |                            |                       |                           |                      |                           |                       |                      |                      |
|---------------------------------|-----------------------------|-----------------------|----------------------------|-----------------------|---------------------------|----------------------|---------------------------|-----------------------|----------------------|----------------------|
|                                 | Pooled<br>(1)               | Pooled<br>(2)         | Between<br>(3)             | Between<br>(4)        | Within<br>(5)             | Within<br>(6)        | RE<br>(7)                 | RE<br>(8)             | Lagged DV<br>(9)     | Lagged DV<br>(10)    |
| Quality of management ( $M_2$ ) | -2,930.598**<br>(1,388.259) | -466.941<br>(433.209) | -3,897.992*<br>(2,318.771) | -540.942<br>(816.263) | -1,167.568**<br>(533.118) | -80.677<br>(224.766) | -1,214.839**<br>(524.251) | -182.481<br>(217.796) | 148.641<br>(181.704) | -75.529<br>(178.410) |
| Size and casemix controls       | FALSE                       | TRUE                  | FALSE                      | TRUE                  | FALSE                     | TRUE                 | FALSE                     | TRUE                  | FALSE                | TRUE                 |
| Observations                    | 899                         | 893                   | 134                        | 134                   | 899                       | 893                  | 899                       | 893                   | 749                  | 745                  |
| R <sup>2</sup>                  | 0.040                       | 0.885                 | 0.021                      | 0.913                 | 0.020                     | 0.605                | 0.308                     | 0.746                 | 0.964                | 0.968                |

Note:

\*p<0.1; \*\*p<0.05; \*\*\*p<0.01

Control for number of beds, total budget, number of staff and proportion of admissions by age-sex group

36

Breusch-Pagan Test - RE vs pooled without controls

p = 0 therefore: RE is preferred to Pooled

Hausman Test - FE vs RE without controls

p = 0.21314 therefore: RE is preferred to FE

Breusch-Pagan Test - RE vs pooled with controls

p = 0 therefore: RE is preferred to Pooled

Hausman Test - FE vs RE with controls

p = 0 therefore: **FE is preferred to RE**

### 6.4.3 Number of managers ( $M_3$ )

Table 25: Amount of managerial input and Total inpatient admissions 2016/17 – 2018/19

|                              | Total inpatient admissions |                    |                        |                     |                        |                     |                        |                     |                     |                    |
|------------------------------|----------------------------|--------------------|------------------------|---------------------|------------------------|---------------------|------------------------|---------------------|---------------------|--------------------|
|                              | Pooled                     | Pooled             | Between                | Between             | Within                 | Within              | RE                     | RE                  | Lagged DV           | Lagged DV          |
|                              | (1)                        | (2)                | (3)                    | (4)                 | (5)                    | (6)                 | (7)                    | (8)                 | (9)                 | (10)               |
| Number of managers ( $M_3$ ) | 379.882***<br>(52.668)     | -7.277<br>(29.271) | 360.834***<br>(42.826) | -12.737<br>(25.185) | 299.485**<br>(148.081) | -46.927<br>(40.476) | 329.424***<br>(79.560) | -37.985<br>(32.397) | 17.716**<br>(7.058) | 12.758*<br>(7.440) |
| Size and casemix controls    | FALSE                      | TRUE               | FALSE                  | TRUE                | FALSE                  | TRUE                | FALSE                  | TRUE                | FALSE               | TRUE               |
| Observations                 | 382                        | 382                | 134                    | 134                 | 382                    | 382                 | 382                    | 382                 | 381                 | 381                |
| R <sup>2</sup>               | 0.358                      | 0.897              | 0.350                  | 0.910               | 0.177                  | 0.656               | 0.345                  | 0.722               | 0.972               | 0.974              |

Note:

\*p<0.1; \*\*p<0.05; \*\*\*p<0.01

Control for number of beds, total budget, number of staff and proportion of admissions by age-sex group

Breusch-Pagan Test - RE vs pooled without controls

p = 0 therefore: RE is preferred to Pooled

Hausman Test - FE vs RE without controls

p = 0.45683 therefore: RE is preferred to FE

Breusch-Pagan Test - RE vs pooled with controls

p = 0 therefore: RE is preferred to Pooled

Hausman Test - FE vs RE with controls

p = 0 therefore: **FE is preferred to RE**

#### 6.4.4 Spend on managers in £ million ( $M_4$ )

Table 26: Amount of managerial input and Total inpatient admissions 2016/17 – 2018/19

|                                          | Total inpatient admissions |                      |                           |                       |                            |                       |                             |                       |                         |                        |
|------------------------------------------|----------------------------|----------------------|---------------------------|-----------------------|----------------------------|-----------------------|-----------------------------|-----------------------|-------------------------|------------------------|
|                                          | Pooled                     | Pooled               | Between                   | Between               | Within                     | Within                | RE                          | RE                    | Lagged DV               | Lagged DV              |
|                                          | (1)                        | (2)                  | (3)                       | (4)                   | (5)                        | (6)                   | (7)                         | (8)                   | (9)                     | (10)                   |
| Spend on managers in £ million ( $M_4$ ) | 7,146.755***<br>(934.153)  | -93.800<br>(569.005) | 6,733.398***<br>(726.613) | -224.583<br>(494.799) | 5,521.627**<br>(2,536.941) | -453.417<br>(686.583) | 6,112.432***<br>(1,377.492) | -489.215<br>(558.165) | 364.667***<br>(139.232) | 299.041**<br>(150.472) |
| Size and casemix controls                | FALSE                      | TRUE                 | FALSE                     | TRUE                  | FALSE                      | TRUE                  | FALSE                       | TRUE                  | FALSE                   | TRUE                   |
| Observations                             | 382                        | 382                  | 134                       | 134                   | 382                        | 382                   | 382                         | 382                   | 381                     | 381                    |
| R <sup>2</sup>                           | 0.409                      | 0.897                | 0.394                     | 0.910                 | 0.202                      | 0.654                 | 0.374                       | 0.721                 | 0.973                   | 0.974                  |

Note:

\*p<0.1; \*\*p<0.05; \*\*\*p<0.01

Control for number of beds, total budget, number of staff and proportion of admissions by age-sex group

38

Breusch-Pagan Test - RE vs pooled without controls

p = 0 therefore: RE is preferred to Pooled

Hausman Test - FE vs RE without controls

p = 0.60647 therefore: RE is preferred to FE

Breusch-Pagan Test - RE vs pooled with controls

p = 0 therefore: RE is preferred to Pooled

Hausman Test - FE vs RE with controls

p = 0 therefore: **FE is preferred to RE**

## 6.5 Summary Hospital-level Mortality Indicator

### 6.5.1 Number of managers ( $M_1$ )

Table 27: Amount of managerial input and Summary Hospital-level Mortality Indicator 2012/13 – 2018/19

|                              | Summary Hospital-level Mortality Indicator |                     |                        |                     |                      |                     |                     |                      |                       |                       |
|------------------------------|--------------------------------------------|---------------------|------------------------|---------------------|----------------------|---------------------|---------------------|----------------------|-----------------------|-----------------------|
|                              | Pooled                                     | Pooled              | Between                | Between             | Within               | Within              | RE                  | RE                   | Lagged DV             | Lagged DV             |
|                              | (1)                                        | (2)                 | (3)                    | (4)                 | (5)                  | (6)                 | (7)                 | (8)                  | (9)                   | (10)                  |
| Number of managers ( $M_1$ ) | -0.0004***<br>(0.0001)                     | -0.0001<br>(0.0001) | -0.0004***<br>(0.0001) | -0.0001<br>(0.0001) | -0.00002<br>(0.0001) | 0.00000<br>(0.0001) | -0.0002<br>(0.0001) | -0.00003<br>(0.0001) | -0.0001*<br>(0.00003) | -0.00003<br>(0.00003) |
| Size and casemix controls    | FALSE                                      | TRUE                | FALSE                  | TRUE                | FALSE                | TRUE                | FALSE               | TRUE                 | FALSE                 | TRUE                  |
| Observations                 | 922                                        | 888                 | 134                    | 134                 | 922                  | 888                 | 922                 | 888                  | 787                   | 755                   |
| R <sup>2</sup>               | 0.101                                      | 0.445               | 0.132                  | 0.594               | 0.0001               | 0.034               | 0.026               | 0.137                | 0.739                 | 0.751                 |

Note:

\*p<0.1; \*\*p<0.05; \*\*\*p<0.01

Control for number of beds, total budget, number of staff and proportion of admissions by age-sex group

Breusch-Pagan Test - RE vs pooled without controls

p = 0 therefore: RE is preferred to Pooled

Hausman Test - FE vs RE without controls

p = 0.00198 therefore: FE is preferred to RE

Breusch-Pagan Test - RE vs pooled with controls

p = 0 therefore: RE is preferred to Pooled

Hausman Test - FE vs RE with controls

p = 0.00029 therefore: **FE is preferred to RE**

### 6.5.2 Quality of management ( $M_2$ )

Table 28: Amount of managerial input and Summary Hospital-level Mortality Indicator 2012/13 – 2018/19

|                                 | Summary Hospital-level Mortality Indicator |                   |                      |                   |                    |                   |                   |                    |                   |                  |
|---------------------------------|--------------------------------------------|-------------------|----------------------|-------------------|--------------------|-------------------|-------------------|--------------------|-------------------|------------------|
|                                 | Pooled                                     | Pooled            | Between              | Between           | Within             | Within            | RE                | RE                 | Lagged DV         | Lagged DV        |
|                                 | (1)                                        | (2)               | (3)                  | (4)               | (5)                | (6)               | (7)               | (8)                | (9)               | (10)             |
| Quality of management ( $M_2$ ) | -0.006***<br>(0.002)                       | -0.001<br>(0.002) | -0.010***<br>(0.003) | -0.001<br>(0.003) | -0.0001<br>(0.001) | 0.0001<br>(0.001) | -0.001<br>(0.001) | -0.0003<br>(0.001) | 0.0001<br>(0.001) | 0.001<br>(0.001) |
| Size and casemix controls       | FALSE                                      | TRUE              | FALSE                | TRUE              | FALSE              | TRUE              | FALSE             | TRUE               | FALSE             | TRUE             |
| Observations                    | 922                                        | 888               | 134                  | 134               | 922                | 888               | 922               | 888                | 787               | 755              |
| R <sup>2</sup>                  | 0.030                                      | 0.442             | 0.058                | 0.589             | 0.00002            | 0.034             | 0.019             | 0.136              | 0.738             | 0.751            |

Note:

\*p<0.1; \*\*p<0.05; \*\*\*p<0.01

Control for number of beds, total budget, number of staff and proportion of admissions by age-sex group

Breusch-Pagan Test - RE vs pooled without controls

p = 0 therefore: RE is preferred to Pooled

Hausman Test - FE vs RE without controls

p = 0.01217 therefore: FE is preferred to RE

Breusch-Pagan Test - RE vs pooled with controls

p = 0 therefore: RE is preferred to Pooled

Hausman Test - FE vs RE with controls

p = 0.00035 therefore: **FE is preferred to RE**



### 6.5.3 Number of managers ( $M_3$ )

Table 29: Amount of managerial input and Summary Hospital-level Mortality Indicator 2016/17 – 2018/19

|                              | Summary Hospital-level Mortality Indicator |                     |                        |                      |                     |                     |                       |                     |                       |                      |
|------------------------------|--------------------------------------------|---------------------|------------------------|----------------------|---------------------|---------------------|-----------------------|---------------------|-----------------------|----------------------|
|                              | Pooled                                     | Pooled              | Between                | Between              | Within              | Within              | RE                    | RE                  | Lagged DV             | Lagged DV            |
|                              | (1)                                        | (2)                 | (3)                    | (4)                  | (5)                 | (6)                 | (7)                   | (8)                 | (9)                   | (10)                 |
| Number of managers ( $M_3$ ) | -0.0003***<br>(0.0001)                     | -0.0001<br>(0.0001) | -0.0003***<br>(0.0001) | -0.00004<br>(0.0001) | -0.0001<br>(0.0001) | -0.0003<br>(0.0002) | -0.0002**<br>(0.0001) | -0.0001<br>(0.0001) | -0.00001<br>(0.00003) | 0.00001<br>(0.00003) |
| Size and casemix controls    | FALSE                                      | TRUE                | FALSE                  | TRUE                 | FALSE               | TRUE                | FALSE                 | TRUE                | FALSE                 | TRUE                 |
| Observations                 | 390                                        | 377                 | 134                    | 134                  | 390                 | 377                 | 390                   | 377                 | 389                   | 376                  |
| R <sup>2</sup>               | 0.088                                      | 0.456               | 0.077                  | 0.494                | 0.002               | 0.040               | 0.214                 | 0.415               | 0.781                 | 0.794                |

Note:

\*p<0.1; \*\*p<0.05; \*\*\*p<0.01

Control for number of beds, total budget, number of staff and proportion of admissions by age-sex group

41

Breusch-Pagan Test - RE vs pooled without controls

p = 0 therefore: RE is preferred to Pooled

Hausman Test - FE vs RE without controls

p = 0 therefore: FE is preferred to RE

Breusch-Pagan Test - RE vs pooled with controls

p = 0 therefore: RE is preferred to Pooled

Hausman Test - FE vs RE with controls

p = 0.00011 therefore: **FE is preferred to RE**

### 6.5.4 Spend on managers in £ million ( $M_4$ )

Table 30: Amount of managerial input and Summary Hospital-level Mortality Indicator 2016/17 – 2018/19

|                                          | Summary Hospital-level Mortality Indicator |                   |                      |                   |                   |                   |                      |                   |                     |                   |
|------------------------------------------|--------------------------------------------|-------------------|----------------------|-------------------|-------------------|-------------------|----------------------|-------------------|---------------------|-------------------|
|                                          | Pooled                                     | Pooled            | Between              | Between           | Within            | Within            | RE                   | RE                | Lagged DV           | Lagged DV         |
|                                          | (1)                                        | (2)               | (3)                  | (4)               | (5)               | (6)               | (7)                  | (8)               | (9)                 | (10)              |
| Spend on managers in £ million ( $M_4$ ) | -0.006***<br>(0.002)                       | -0.002<br>(0.002) | -0.005***<br>(0.001) | -0.001<br>(0.002) | -0.002<br>(0.002) | -0.005<br>(0.004) | -0.005***<br>(0.002) | -0.002<br>(0.002) | -0.0003<br>(0.0005) | 0.0003<br>(0.001) |
| Size and casemix controls                | FALSE                                      | TRUE              | FALSE                | TRUE              | FALSE             | TRUE              | FALSE                | TRUE              | FALSE               | TRUE              |
| Observations                             | 390                                        | 377               | 134                  | 134               | 390               | 377               | 390                  | 377               | 389                 | 376               |
| R <sup>2</sup>                           | 0.121                                      | 0.456             | 0.110                | 0.494             | 0.002             | 0.040             | 0.224                | 0.419             | 0.781               | 0.794             |

Note:

\*p<0.1; \*\*p<0.05; \*\*\*p<0.01

Control for number of beds, total budget, number of staff and proportion of admissions by age-sex group

Breusch-Pagan Test - RE vs pooled without controls

p = 0 therefore: RE is preferred to Pooled

Hausman Test - FE vs RE without controls

p = 0 therefore: FE is preferred to RE

Breusch-Pagan Test - RE vs pooled with controls

p = 0 therefore: RE is preferred to Pooled

Hausman Test - FE vs RE with controls

p = 0.00015 therefore: **FE is preferred to RE**

## 7 Impact of responses to individual questions within the NHS staff survey on outcomes

### 7.1 Net financial position (£ million)

Table 31: Managerial quality and Net financial position (£ million) 2012/13 – 2018/19

|                | Net financial position (£ million) |                  |                  |                  |                  |                  |                   |                  |                     |                  |                  |                  |
|----------------|------------------------------------|------------------|------------------|------------------|------------------|------------------|-------------------|------------------|---------------------|------------------|------------------|------------------|
|                | overall                            | 7a               | 7b               | 7c               | 7d               | 7e               | 7f                | 7g               | 8a                  | 8b               | 8c               | 8d               |
|                | (1)                                | (2)              | (3)              | (4)              | (5)              | (6)              | (7)               | (8)              | (9)                 | (10)             | (11)             | (12)             |
| overall        | 0.433<br>(0.441)                   |                  |                  |                  |                  |                  |                   |                  |                     |                  |                  |                  |
| 7a             |                                    | 0.225<br>(0.463) |                  |                  |                  |                  |                   |                  |                     |                  |                  |                  |
| 7b             |                                    |                  | 0.297<br>(0.393) |                  |                  |                  |                   |                  |                     |                  |                  |                  |
| 7c             |                                    |                  |                  | 0.272<br>(0.389) |                  |                  |                   |                  |                     |                  |                  |                  |
| 7d             |                                    |                  |                  |                  | 0.301<br>(0.385) |                  |                   |                  |                     |                  |                  |                  |
| 7e             |                                    |                  |                  |                  |                  | 0.375<br>(0.473) |                   |                  |                     |                  |                  |                  |
| 7f             |                                    |                  |                  |                  |                  |                  | 1.114*<br>(0.614) |                  |                     |                  |                  |                  |
| 7g             |                                    |                  |                  |                  |                  |                  |                   | 1.258<br>(0.850) |                     |                  |                  |                  |
| 8a             |                                    |                  |                  |                  |                  |                  |                   |                  | 0.968***<br>(0.346) |                  |                  |                  |
| 8b             |                                    |                  |                  |                  |                  |                  |                   |                  |                     | 0.357<br>(0.260) |                  |                  |
| 8c             |                                    |                  |                  |                  |                  |                  |                   |                  |                     |                  | 0.431<br>(0.280) |                  |
| 8d             |                                    |                  |                  |                  |                  |                  |                   |                  |                     |                  |                  | 0.336<br>(0.274) |
| Observations   | 893                                | 893              | 893              | 893              | 893              | 893              | 513               | 513              | 893                 | 893              | 893              | 893              |
| R <sup>2</sup> | 0.034                              | 0.032            | 0.033            | 0.033            | 0.033            | 0.033            | 0.039             | 0.040            | 0.047               | 0.035            | 0.037            | 0.035            |

Note:

Control for hospital fixed effects, number of beds, total budget, number of staff and proportion of admissions by age-sex group \*p<0.1; \*\*p<0.05; \*\*\*p<0.01

## 7.2 Elective waiting time target met (%)

Table 32: Managerial quality and Elective waiting time target met (%) 2012/13 – 2018/19

|                | Elective waiting time target met (%) |                   |                   |                   |                  |                   |                  |                  |                   |                    |                  |                   |
|----------------|--------------------------------------|-------------------|-------------------|-------------------|------------------|-------------------|------------------|------------------|-------------------|--------------------|------------------|-------------------|
|                | overall                              | 7a                | 7b                | 7c                | 7d               | 7e                | 7f               | 7g               | 8a                | 8b                 | 8c               | 8d                |
|                | (1)                                  | (2)               | (3)               | (4)               | (5)              | (6)               | (7)              | (8)              | (9)               | (10)               | (11)             | (12)              |
| overall        | -0.020<br>(0.093)                    |                   |                   |                   |                  |                   |                  |                  |                   |                    |                  |                   |
| 7a             |                                      | -0.003<br>(0.087) |                   |                   |                  |                   |                  |                  |                   |                    |                  |                   |
| 7b             |                                      |                   | -0.025<br>(0.079) |                   |                  |                   |                  |                  |                   |                    |                  |                   |
| 7c             |                                      |                   |                   | -0.017<br>(0.080) |                  |                   |                  |                  |                   |                    |                  |                   |
| 7d             |                                      |                   |                   |                   | 0.055<br>(0.073) |                   |                  |                  |                   |                    |                  |                   |
| 7e             |                                      |                   |                   |                   |                  | -0.005<br>(0.091) |                  |                  |                   |                    |                  |                   |
| 7f             |                                      |                   |                   |                   |                  |                   | 0.177<br>(0.108) |                  |                   |                    |                  |                   |
| 7g             |                                      |                   |                   |                   |                  |                   |                  | 0.171<br>(0.129) |                   |                    |                  |                   |
| 8a             |                                      |                   |                   |                   |                  |                   |                  |                  | 0.0002<br>(0.085) |                    |                  |                   |
| 8b             |                                      |                   |                   |                   |                  |                   |                  |                  |                   | -0.0003<br>(0.063) |                  |                   |
| 8c             |                                      |                   |                   |                   |                  |                   |                  |                  |                   |                    | 0.012<br>(0.065) |                   |
| 8d             |                                      |                   |                   |                   |                  |                   |                  |                  |                   |                    |                  | -0.017<br>(0.064) |
| Observations   | 865                                  | 865               | 865               | 865               | 865              | 865               | 497              | 497              | 865               | 865                | 865              | 865               |
| R <sup>2</sup> | 0.018                                | 0.017             | 0.018             | 0.017             | 0.018            | 0.017             | 0.064            | 0.063            | 0.017             | 0.017              | 0.017            | 0.018             |

Note:

Control for hospital fixed effects, number of beds, total budget, number of staff and proportion of admissions by age-sex group \*p<0.1; \*\*p<0.05; \*\*\*p<0.01

### 7.3 A&E waiting time target met (%)

Table 33: Managerial quality and A&E waiting time target met (%) 2012/13 – 2018/19

|                | A&E waiting time target met (%) |                  |                   |                  |                  |                  |                   |                  |                  |                  |                  |                  |
|----------------|---------------------------------|------------------|-------------------|------------------|------------------|------------------|-------------------|------------------|------------------|------------------|------------------|------------------|
|                | overall                         | 7a               | 7b                | 7c               | 7d               | 7e               | 7f                | 7g               | 8a               | 8b               | 8c               | 8d               |
|                | (1)                             | (2)              | (3)               | (4)              | (5)              | (6)              | (7)               | (8)              | (9)              | (10)             | (11)             | (12)             |
| overall        | 0.122<br>(0.107)                |                  |                   |                  |                  |                  |                   |                  |                  |                  |                  |                  |
| 7a             |                                 | 0.150<br>(0.111) |                   |                  |                  |                  |                   |                  |                  |                  |                  |                  |
| 7b             |                                 |                  | 0.185*<br>(0.106) |                  |                  |                  |                   |                  |                  |                  |                  |                  |
| 7c             |                                 |                  |                   | 0.126<br>(0.105) |                  |                  |                   |                  |                  |                  |                  |                  |
| 7d             |                                 |                  |                   |                  | 0.078<br>(0.093) |                  |                   |                  |                  |                  |                  |                  |
| 7e             |                                 |                  |                   |                  |                  | 0.103<br>(0.111) |                   |                  |                  |                  |                  |                  |
| 7f             |                                 |                  |                   |                  |                  |                  | 0.315*<br>(0.166) |                  |                  |                  |                  |                  |
| 7g             |                                 |                  |                   |                  |                  |                  |                   | 0.274<br>(0.176) |                  |                  |                  |                  |
| 8a             |                                 |                  |                   |                  |                  |                  |                   |                  | 0.008<br>(0.080) |                  |                  |                  |
| 8b             |                                 |                  |                   |                  |                  |                  |                   |                  |                  | 0.105<br>(0.071) |                  |                  |
| 8c             |                                 |                  |                   |                  |                  |                  |                   |                  |                  |                  | 0.097<br>(0.077) |                  |
| 8d             |                                 |                  |                   |                  |                  |                  |                   |                  |                  |                  |                  | 0.099<br>(0.081) |
| Observations   | 817                             | 817              | 817               | 817              | 817              | 817              | 469               | 469              | 817              | 817              | 817              | 817              |
| R <sup>2</sup> | 0.033                           | 0.033            | 0.035             | 0.033            | 0.031            | 0.031            | 0.041             | 0.037            | 0.030            | 0.034            | 0.034            | 0.034            |

Note:

Control for hospital fixed effects, number of beds, total budget, number of staff and proportion of admissions by age-sex group \*p<0.1; \*\*p<0.05; \*\*\*p<0.01

## 7.4 Total inpatient admissions

Table 34: Managerial quality and Total inpatient admissions 2012/13 – 2018/19

|                | Total inpatient admissions |                      |                      |                      |                      |                       |                      |                      |                      |                      |                     |                    |
|----------------|----------------------------|----------------------|----------------------|----------------------|----------------------|-----------------------|----------------------|----------------------|----------------------|----------------------|---------------------|--------------------|
|                | overall                    | 7a                   | 7b                   | 7c                   | 7d                   | 7e                    | 7f                   | 7g                   | 8a                   | 8b                   | 8c                  | 8d                 |
|                | (1)                        | (2)                  | (3)                  | (4)                  | (5)                  | (6)                   | (7)                  | (8)                  | (9)                  | (10)                 | (11)                | (12)               |
| overall        | -80.677<br>(224.766)       |                      |                      |                      |                      |                       |                      |                      |                      |                      |                     |                    |
| 7a             |                            | -24.288<br>(221.843) |                      |                      |                      |                       |                      |                      |                      |                      |                     |                    |
| 7b             |                            |                      | -55.074<br>(202.367) |                      |                      |                       |                      |                      |                      |                      |                     |                    |
| 7c             |                            |                      |                      | -21.672<br>(194.115) |                      |                       |                      |                      |                      |                      |                     |                    |
| 7d             |                            |                      |                      |                      | -91.820<br>(195.681) |                       |                      |                      |                      |                      |                     |                    |
| 7e             |                            |                      |                      |                      |                      | -160.548<br>(218.805) |                      |                      |                      |                      |                     |                    |
| 7f             |                            |                      |                      |                      |                      |                       | 278.452<br>(293.980) |                      |                      |                      |                     |                    |
| 7g             |                            |                      |                      |                      |                      |                       |                      | 192.878<br>(346.803) |                      |                      |                     |                    |
| 8a             |                            |                      |                      |                      |                      |                       |                      |                      | -84.524<br>(187.298) |                      |                     |                    |
| 8b             |                            |                      |                      |                      |                      |                       |                      |                      |                      | -48.983<br>(148.326) |                     |                    |
| 8c             |                            |                      |                      |                      |                      |                       |                      |                      |                      |                      | -2.974<br>(152.845) |                    |
| 8d             |                            |                      |                      |                      |                      |                       |                      |                      |                      |                      |                     | 6.363<br>(154.966) |
| Observations   | 893                        | 893                  | 893                  | 893                  | 893                  | 893                   | 513                  | 513                  | 893                  | 893                  | 893                 | 893                |
| R <sup>2</sup> | 0.605                      | 0.605                | 0.605                | 0.605                | 0.605                | 0.605                 | 0.438                | 0.437                | 0.605                | 0.605                | 0.605               | 0.605              |

Note:

\*p<0.1; \*\*p<0.05; \*\*\*p<0.01  
Control for hospital fixed effects, number of beds, total budget, number of staff and proportion of admissions by age-sex group

## 7.5 Summary Hospital-level Mortality Indicator

Table 35: Managerial quality and Summary Hospital-level Mortality Indicator 2012/13 – 2018/19

|                | Summary Hospital-level Mortality Indicator |                  |                  |                   |                   |                  |                  |                  |                    |                   |                   |                    |
|----------------|--------------------------------------------|------------------|------------------|-------------------|-------------------|------------------|------------------|------------------|--------------------|-------------------|-------------------|--------------------|
|                | overall                                    | 7a               | 7b               | 7c                | 7d                | 7e               | 7f               | 7g               | 8a                 | 8b                | 8c                | 8d                 |
|                | (1)                                        | (2)              | (3)              | (4)               | (5)               | (6)              | (7)              | (8)              | (9)                | (10)              | (11)              | (12)               |
| overall        | 0.0001<br>(0.001)                          |                  |                  |                   |                   |                  |                  |                  |                    |                   |                   |                    |
| 7a             |                                            | 0.001<br>(0.001) |                  |                   |                   |                  |                  |                  |                    |                   |                   |                    |
| 7b             |                                            |                  | 0.001<br>(0.001) |                   |                   |                  |                  |                  |                    |                   |                   |                    |
| 7c             |                                            |                  |                  | 0.0004<br>(0.001) |                   |                  |                  |                  |                    |                   |                   |                    |
| 7d             |                                            |                  |                  |                   | 0.0004<br>(0.001) |                  |                  |                  |                    |                   |                   |                    |
| 7e             |                                            |                  |                  |                   |                   | 0.001<br>(0.001) |                  |                  |                    |                   |                   |                    |
| 7f             |                                            |                  |                  |                   |                   |                  | 0.001<br>(0.002) |                  |                    |                   |                   |                    |
| 7g             |                                            |                  |                  |                   |                   |                  |                  | 0.001<br>(0.002) |                    |                   |                   |                    |
| 8a             |                                            |                  |                  |                   |                   |                  |                  |                  | 0.00003<br>(0.001) |                   |                   |                    |
| 8b             |                                            |                  |                  |                   |                   |                  |                  |                  |                    | -0.001<br>(0.001) |                   |                    |
| 8c             |                                            |                  |                  |                   |                   |                  |                  |                  |                    |                   | -0.001<br>(0.001) |                    |
| 8d             |                                            |                  |                  |                   |                   |                  |                  |                  |                    |                   |                   | -0.0005<br>(0.001) |
| Observations   | 888                                        | 888              | 888              | 888               | 888               | 888              | 508              | 508              | 888                | 888               | 888               | 888                |
| R <sup>2</sup> | 0.034                                      | 0.035            | 0.035            | 0.034             | 0.034             | 0.035            | 0.050            | 0.050            | 0.034              | 0.035             | 0.034             | 0.034              |

Note:

Control for hospital fixed effects, number of beds, total budget, number of staff and proportion of admissions by age-sex group \*p<0.1; \*\*p<0.05; \*\*\*p<0.01
